# Supplementary material for: Entomological and parasitological impacts of indoor residual spraying with DDT, alphacypermethrin and deltamethrin in the western foothill area of Madagascar
Source: Malar J. 2014 Jan 14;13:21. doi: 10.1186/1475-2875-13-21 (PMC3906765; doi:10.1186/1475-2875-13-21)
Supplement: Additional file 1: Table S1 — MahasoloParasito 2002–2005.xls. Crude demographic, parasitological and clinical data collected during the whole study. Each of the 5,174 lines concerns one schoolchild in the sheet 1. The 34 columns are detailed in the sheet 2. [file 1475-2875-13-21-S1.xls]

## Sheet: Parasito
Code	Commune	School	Date	Passage	Sex	Age	Temperature	Fever	AttckPf	AttackPm	AttackPo	AttackPv	AttackPsp	Spleen	Weight	PF	falc	PFGam	GamFalc	PM	mala	PMGam	GamMala	PO	oval	POGam	GamOval	PV	viva	PVGam	gamViva	PlasmoIndex
1M1	1	EPP Maevarano	2002-11-20	1	1	8	36.9	0	0	0	0	0	0	0	17	0	0	0	0	0	0	0	0	0	0	0	0	0	0	0	0	0
2M1	1	EPP Maevarano	2002-11-20	1	0	10	36.2	0	0	0	0	0	0	0	29	0	0	0	0	0	0	0	0	0	0	0	0	0	0	0	0	0
3M1	1	EPP Maevarano	2002-11-20	1	1	10	36.3	0	0	0	0	0	0	0	37	0	0	0	0	0	0	0	0	0	0	0	0	0	0	0	0	0
4M1	1	EPP Maevarano	2002-11-20	1	1	6	36.4	0	0	0	0	0	0	0	17	0	0	0	0	0	0	0	0	0	0	0	0	0	0	0	0	0
5M1	1	EPP Maevarano	2002-11-20	1	1	6	36.8	0	0	0	0	0	0	0	17	0	0	0	0	0	0	0	0	0	0	0	0	0	0	0	0	0
6M1	1	EPP Maevarano	2002-11-20	1	1	6	36.2	0	0	0	0	0	0	0	19	0	0	0	0	0	0	0	0	0	0	0	0	0	0	0	0	0
7M1	1	EPP Maevarano	2002-11-20	1	1	7	36.9	0	0	0	0	0	0	0	19	0	0	0	0	0	0	0	0	0	0	0	0	0	0	0	0	0
8M1	1	EPP Maevarano	2002-11-20	1	0	8	36.4	0	0	0	0	0	0	0	24	0	0	0	0	0	0	0	0	0	0	0	0	0	0	0	0	0
9M1	1	EPP Maevarano	2002-11-20	1	1	7	36.5	0	0	0	0	0	0	0	17	1	128	0	0	0	0	0	0	0	0	0	0	0	0	0	0	1
10M1	1	EPP Maevarano	2002-11-20	1	0	8	36.4	0	0	0	0	0	0	0	19	0	0	0	0	0	0	0	0	0	0	0	0	0	0	0	0	0
11M1	1	EPP Maevarano	2002-11-20	1	1	7	36.8	0	0	0	0	0	0	0	18	0	0	0	0	0	0	0	0	0	0	0	0	0	0	0	0	0
12M1	1	EPP Maevarano	2002-11-20	1	0	10	37.7	1	1	0	0	0	1	0	26	1	16	0	0	0	0	0	0	0	0	0	0	0	0	0	0	1
13M1	1	EPP Maevarano	2002-11-20	1	1	6	36.2	0	0	0	0	0	0	0	15	0	0	0	0	0	0	0	0	0	0	0	0	0	0	0	0	0
14M1	1	EPP Maevarano	2002-11-20	1	1	6	36.2	0	0	0	0	0	0	0	17	0	0	0	0	0	0	0	0	0	0	0	0	0	0	0	0	0
15M1	1	EPP Maevarano	2002-11-20	1	1	10	36.3	0	0	0	0	0	0	0	24	0	0	0	0	0	0	0	0	0	0	0	0	0	0	0	0	0
16M1	1	EPP Maevarano	2002-11-20	1	1	6	36.9	0	0	0	0	0	0	0	22	0	0	0	0	0	0	0	0	0	0	0	0	0	0	0	0	0
17M1	1	EPP Maevarano	2002-11-20	1	0	8	35.9	0	0	0	0	0	0	2	24	1	96	0	0	0	0	0	0	0	0	0	0	0	0	0	0	1
18M1	1	EPP Maevarano	2002-11-20	1	0	8	37	1	0	0	0	0	0	0	30	0	0	0	0	0	0	0	0	0	0	0	0	0	0	0	0	0
19M1	1	EPP Maevarano	2002-11-20	1	0	8	36.4	0	0	0	0	0	0	0	19	1	756	1	16	0	0	0	0	0	0	0	0	0	0	0	0	1
20M1	1	EPP Maevarano	2002-11-20	1	0	7	36.2	0	0	0	0	0	0	0	21	1	128	0	0	0	0	0	0	0	0	0	0	0	0	0	0	1
21M1	1	EPP Maevarano	2002-11-20	1	1	8	36.3	0	0	0	0	0	0	2	21	0	0	0	0	0	0	0	0	0	0	0	0	0	0	0	0	0
22M1	1	EPP Maevarano	2002-11-20	1	1	8	36	0	0	0	0	0	0	2	25	0	0	0	0	0	0	0	0	0	0	0	0	0	0	0	0	0
23M1	1	EPP Maevarano	2002-11-20	1	0	6	36.3	0	0	0	0	0	0	0	17	1	32	0	0	0	0	0	0	0	0	0	0	0	0	0	0	1
24M1	1	EPP Maevarano	2002-11-20	1	1	8	36.1	0	0	0	0	0	0	2	19	0	0	0	0	0	0	0	0	0	0	0	0	0	0	0	0	0
25M1	1	EPP Maevarano	2002-11-20	1	1	12	36.2	0	0	0	0	0	0	0	15	1	560	0	0	0	0	0	0	0	0	0	0	0	0	0	0	1
26M1	1	EPP Maevarano	2002-11-20	1	1	10	37	1	0	0	0	0	0	0	31	0	0	0	0	0	0	0	0	0	0	0	0	0	0	0	0	0
27M1	1	EPP Maevarano	2002-11-20	1	0	9	36.4	0	0	0	0	0	0	0	26	0	0	0	0	0	0	0	0	0	0	0	0	0	0	0	0	0
28M1	1	EPP Maevarano	2002-11-20	1	0	6	37.1	1	0	0	0	0	0	0	20	0	0	0	0	0	0	0	0	0	0	0	0	0	0	0	0	0
29M1	1	EPP Maevarano	2002-11-20	1	0	7	36.5	0	0	0	0	0	0	0	18	0	0	0	0	0	0	0	0	0	0	0	0	0	0	0	0	0
30M1	1	EPP Maevarano	2002-11-20	1	1	7	36.6	0	0	0	0	0	0	0	20	0	0	0	0	0	0	0	0	0	0	0	0	0	0	0	0	0
31M1	1	EPP Maevarano	2002-11-20	1	1	6	36.9	0	0	0	0	0	0	2	17	0	0	0	0	0	0	0	0	0	0	0	0	0	0	0	0	0
32M1	1	EPP Maevarano	2002-11-20	1	0	8	36.2	0	0	0	0	0	0	0	23	1	798	0	0	0	0	0	0	0	0	0	0	0	0	0	0	1
33M1	1	EPP Maevarano	2002-11-20	1	1	6	37.5	1	0	0	0	0	0	0	17	0	0	0	0	0	0	0	0	0	0	0	0	0	0	0	0	0
34M1	1	EPP Maevarano	2002-11-20	1	0	8	36.3	0	0	0	0	0	0	0	18	0	0	0	0	0	0	0	0	0	0	0	0	0	0	0	0	0
35M1	1	EPP Maevarano	2002-11-20	1	0	10	36	0	0	0	0	0	0	0	31	1	16	0	0	0	0	0	0	0	0	0	0	0	0	0	0	1
36M1	1	EPP Maevarano	2002-11-20	1	1	7	36.2	0	0	0	0	0	0	0	19	0	0	0	0	0	0	0	0	0	0	0	0	0	0	0	0	0
37M1	1	EPP Maevarano	2002-11-20	1	0	6	36.6	0	0	0	0	0	0	0	22	0	0	0	0	0	0	0	0	0	0	0	0	0	0	0	0	0
38M1	1	EPP Maevarano	2002-11-20	1	0	10	36.4	0	0	0	0	0	0	0	28	0	0	0	0	0	0	0	0	0	0	0	0	0	0	0	0	0
39M1	1	EPP Maevarano	2002-11-20	1	1	9	36.9	0	0	0	0	0	0	0	20	0	0	0	0	0	0	0	0	0	0	0	0	1	379	0	0	1
40M1	1	EPP Maevarano	2002-11-20	1	1	6	37.1	1	0	0	0	0	0	0	19	0	0	0	0	0	0	0	0	0	0	0	0	0	0	0	0	0
41M1	1	EPP Maevarano	2002-11-20	1	1	6	36.7	0	0	0	0	0	0	0	22	0	0	0	0	0	0	0	0	0	0	0	0	1	117	0	0	1
42M1	1	EPP Maevarano	2002-11-20	1	0	7	36.2	0	0	0	0	0	0	2	16	1	520	0	0	0	0	0	0	0	0	0	0	0	0	0	0	1
43M1	1	EPP Maevarano	2002-11-20	1	0	9	36.6	0	0	0	0	0	0	2	21	0	0	0	0	0	0	0	0	0	0	0	0	0	0	0	0	0
44M1	1	EPP Maevarano	2002-11-20	1	0	6	36.6	0	0	0	0	0	0	0	16	0	0	0	0	0	0	0	0	0	0	0	0	0	0	0	0	0
45M1	1	EPP Maevarano	2002-11-20	1	0	7	37	1	0	0	0	0	0	0	21	0	0	0	0	0	0	0	0	0	0	0	0	0	0	0	0	0
46M1	1	EPP Maevarano	2002-11-20	1	0	7	36.5	0	0	0	0	0	0	0	17	1	840	0	0	0	0	0	0	0	0	0	0	1	840	0	0	1
47M1	1	EPP Maevarano	2002-11-20	1	1	6	36.2	0	0	0	0	0	0	0	16	0	0	0	0	0	0	0	0	0	0	0	0	0	0	0	0	0
48M1	1	EPP Maevarano	2002-11-20	1	1	8	36.8	0	0	0	0	0	0	0	20	0	0	0	0	0	0	0	0	0	0	0	0	0	0	0	0	0
49M1	1	EPP Maevarano	2002-11-20	1	0	7	36.9	0	0	0	0	0	0	0	20	0	0	0	0	0	0	0	0	0	0	0	0	0	0	0	0	0
50M1	1	EPP Maevarano	2002-11-20	1	0	7	36.7	0	0	0	0	0	0	0	18	1	520	0	0	0	0	0	0	0	0	0	0	0	0	0	0	1
51M1	1	EPP Maevarano	2002-11-20	1	0	8	36.4	0	0	0	0	0	0	0	18	0	0	0	0	0	0	0	0	0	0	0	0	0	0	0	0	0
52M1	1	EPP Maevarano	2002-11-20	1	1	7	36.9	0	0	0	0	0	0	0	24	0	0	0	0	0	0	0	0	0	0	0	0	0	0	0	0	0
53M1	1	EPP Maevarano	2002-11-20	1	1	8	35.2	0	0	0	0	0	0	0	18	0	0	0	0	0	0	0	0	0	0	0	0	0	0	0	0	0
54M1	1	EPP Maevarano	2002-11-20	1	0	6	35.7	0	0	0	0	0	0	0	19	1	398	0	0	0	0	0	0	0	0	0	0	0	0	0	0	1
55M1	1	EPP Maevarano	2002-11-20	1	0	6	36.2	0	0	0	0	0	0	2	17	1	6520	0	0	0	0	0	0	0	0	0	0	0	0	0	0	1
56M1	1	EPP Maevarano	2002-11-20	1	0	6	36.3	0	0	0	0	0	0	0	19	0	0	0	0	0	0	0	0	0	0	0	0	0	0	0	0	0
57M1	1	EPP Maevarano	2002-11-20	1	0	8	35.9	0	0	0	0	0	0	0	27	0	0	0	0	0	0	0	0	0	0	0	0	0	0	0	0	0
58M1	1	EPP Maevarano	2002-11-20	1	0	9	36.1	0	0	0	0	0	0	0	24	0	0	0	0	0	0	0	0	0	0	0	0	0	0	0	0	0
59M1	1	EPP Maevarano	2002-11-20	1	0	9	35.9	0	0	0	0	0	0	0	17	0	0	0	0	0	0	0	0	0	0	0	0	0	0	0	0	0
60M1	1	EPP Maevarano	2002-11-20	1	1	8	36.2	0	0	0	0	0	0	0	22	0	0	0	0	0	0	0	0	0	0	0	0	0	0	0	0	0
61M1	1	EPP Maevarano	2002-11-20	1	1	6	36.3	0	0	0	0	0	0	0	18	0	0	0	0	0	0	0	0	0	0	0	0	0	0	0	0	0
62M1	1	EPP Maevarano	2002-11-20	1	1	7	36.2	0	0	0	0	0	0	0	22	1	68	0	0	0	0	0	0	0	0	0	0	0	0	0	0	1
63M1	1	EPP Maevarano	2002-11-20	1	0	6	36.6	0	0	0	0	0	0	0	15	0	0	0	0	0	0	0	0	0	0	0	0	0	0	0	0	0
64M1	1	EPP Maevarano	2002-11-20	1	0	7	37.2	1	0	0	0	0	0	0	17	0	0	0	0	0	0	0	0	0	0	0	0	0	0	0	0	0
65M1	1	EPP Maevarano	2002-11-20	1	1	6	36	0	0	0	0	0	0	0	16	0	0	0	0	0	0	0	0	0	0	0	0	0	0	0	0	0
66M1	1	EPP Maevarano	2002-11-20	1	1	8	36.4	0	0	0	0	0	0	0	23	0	0	0	0	0	0	0	0	0	0	0	0	0	0	0	0	0
67M1	1	EPP Maevarano	2002-11-20	1	1	9	35.8	0	0	0	0	0	0	0	20	0	0	0	0	0	0	0	0	0	0	0	0	0	0	0	0	0
68M1	1	EPP Maevarano	2002-11-20	1	1	8	36.2	0	0	0	0	0	0	2	20	0	0	0	0	0	0	0	0	0	0	0	0	0	0	0	0	0
69M1	1	EPP Maevarano	2002-11-20	1	1	8	37	1	1	0	0	0	1	2	20	1	560	0	0	0	0	0	0	0	0	0	0	0	0	0	0	1
70M1	1	EPP Maevarano	2002-11-20	1	1	8	36.7	0	0	0	0	0	0	0	20	0	0	0	0	0	0	0	0	0	0	0	0	0	0	0	0	0
71M1	1	EPP Maevarano	2002-11-20	1	1	8	37.1	1	0	0	0	0	0	0	19	0	0	0	0	0	0	0	0	0	0	0	0	0	0	0	0	0
72M1	1	EPP Maevarano	2002-11-20	1	1	7	36.2	0	0	0	0	0	0	0	17	1	80	0	0	0	0	0	0	0	0	0	0	0	0	0	0	1
73M1	1	EPP Maevarano	2002-11-20	1	1	8	36.5	0	0	0	0	0	0	0	22	0	0	0	0	0	0	0	0	0	0	0	0	0	0	0	0	0
74M1	1	EPP Maevarano	2002-11-20	1	1	7	36.7	0	0	0	0	0	0	0	17	0	0	0	0	0	0	0	0	0	0	0	0	1	79	0	0	1
75M1	1	EPP Maevarano	2002-11-20	1	1	10	36.2	0	0	0	0	0	0	0	28	0	0	0	0	0	0	0	0	0	0	0	0	0	0	0	0	0
76M1	1	EPP Maevarano	2002-11-20	1	1	8	36.2	0	0	0	0	0	0	0	17	0	0	0	0	0	0	0	0	0	0	0	0	0	0	0	0	0
77M1	1	EPP Maevarano	2002-11-20	1	1	8	36.2	0	0	0	0	0	0	0	18	0	0	0	0	0	0	0	0	0	0	0	0	0	0	0	0	0
78M1	1	EPP Maevarano	2002-11-20	1	1	9	37.1	1	1	0	0	0	1	2	19	1	560	0	0	0	0	0	0	0	0	0	0	0	0	0	0	1
79M1	1	EPP Maevarano	2002-11-20	1	1	8	36.5	0	0	0	0	0	0	2	19	0	0	0	0	0	0	0	0	0	0	0	0	0	0	0	0	0
80M1	1	EPP Maevarano	2002-11-20	1	1	8	37.4	1	0	0	0	0	0	0	17	0	0	0	0	0	0	0	0	0	0	0	0	0	0	0	0	0
81M1	1	EPP Maevarano	2002-11-20	1	0	8	37	1	0	0	0	0	0	0	17	0	0	0	0	0	0	0	0	0	0	0	0	0	0	0	0	0
82M1	1	EPP Maevarano	2002-11-20	1	1	10	36.8	0	0	0	0	0	0	0	31	0	0	0	0	0	0	0	0	0	0	0	0	0	0	0	0	0
83M1	1	EPP Maevarano	2002-11-20	1	0	10	36.2	0	0	0	0	0	0	0	25	0	0	0	0	0	0	0	0	0	0	0	0	0	0	0	0	0
84M1	1	EPP Maevarano	2002-11-20	1	1	11	36.6	0	0	0	0	0	0	0	24	1	475	0	0	0	0	0	0	0	0	0	0	0	0	0	0	1
85M1	1	EPP Maevarano	2002-11-20	1	0	9	36.2	0	0	0	0	0	0	0	28	0	0	0	0	0	0	0	0	0	0	0	0	0	0	0	0	0
86M1	1	EPP Maevarano	2002-11-20	1	0	8	36.7	0	0	0	0	0	0	0	23	0	0	0	0	0	0	0	0	0	0	0	0	0	0	0	0	0
87M1	1	EPP Maevarano	2002-11-20	1	1	10	36.4	0	0	0	0	0	0	0	24	0	0	0	0	0	0	0	0	0	0	0	0	0	0	0	0	0
88M1	1	EPP Maevarano	2002-11-20	1	0	11	37.1	1	0	0	0	0	0	0	21	0	0	0	0	0	0	0	0	0	0	0	0	0	0	0	0	0
89M1	1	EPP Maevarano	2002-11-20	1	0	12	36.2	0	0	0	0	0	0	0	22	0	0	0	0	0	0	0	0	0	0	0	0	0	0	0	0	0
90M1	1	EPP Maevarano	2002-11-20	1	0	9	36.2	0	0	0	0	0	0	0	22	1	2480	0	0	0	0	0	0	0	0	0	0	0	0	0	0	1
91M1	1	EPP Maevarano	2002-11-20	1	0	7	36.1	0	0	0	0	0	0	0	19	0	0	0	0	0	0	0	0	0	0	0	0	0	0	0	0	0
92M1	1	EPP Maevarano	2002-11-20	1	1	7	36.3	0	0	0	0	0	0	0	22	0	0	0	0	0	0	0	0	0	0	0	0	0	0	0	0	0
93M1	1	EPP Maevarano	2002-11-20	1	1	7	36.3	0	0	0	0	0	0	0	20	0	0	0	0	0	0	0	0	0	0	0	0	0	0	0	0	0
94M1	1	EPP Maevarano	2002-11-20	1	0	10	37.4	1	0	0	0	0	0	0	22	0	0	0	0	0	0	0	0	0	0	0	0	0	0	0	0	0
95M1	1	EPP Maevarano	2002-11-20	1	1	10	36.9	0	0	0	0	0	0	0	21	0	0	0	0	0	0	0	0	0	0	0	0	0	0	0	0	0
96M1	1	EPP Maevarano	2002-11-20	1	1	7	36.8	0	0	0	0	0	0	0	21	0	0	0	0	0	0	0	0	0	0	0	0	0	0	0	0	0
97M1	1	EPP Maevarano	2002-11-20	1	1	8	36	0	0	0	0	0	0	0	18	0	0	0	0	0	0	0	0	0	0	0	0	0	0	0	0	0
98M1	1	EPP Maevarano	2002-11-20	1	1	10	36.3	0	0	0	0	0	0	0	24	0	0	0	0	0	0	0	0	0	0	0	0	0	0	0	0	0
99M1	1	EPP Maevarano	2002-11-20	1	1	11	36.1	0	0	0	0	0	0	0	28	1	79	0	0	0	0	0	0	0	0	0	0	0	0	0	0	1
100M1	1	EPP Maevarano	2002-11-20	1	1	12	35.9	0	0	0	0	0	0	0	29	0	0	0	0	0	0	0	0	0	0	0	0	0	0	0	0	0
101M1	1	EPP Maevarano	2002-11-20	1	1	10	36	0	0	0	0	0	0	2	26	0	0	0	0	0	0	0	0	0	0	0	0	0	0	0	0	0
102M1	1	EPP Maevarano	2002-11-20	1	0	8	36.8	0	0	0	0	0	0	0	24	0	0	0	0	0	0	0	0	0	0	0	0	0	0	0	0	0
103M1	1	EPP Maevarano	2002-11-20	1	1	12	36.5	0	0	0	0	0	0	0	32	1	400	0	0	0	0	0	0	0	0	0	0	0	0	0	0	1
104M1	1	EPP Maevarano	2002-11-20	1	1	7	36.4	0	0	0	0	0	0	0	19	0	0	0	0	0	0	0	0	0	0	0	0	0	0	0	0	0
105M1	1	EPP Maevarano	2002-11-20	1	1	9	37	1	0	0	0	0	0	0	29	0	0	0	0	0	0	0	0	0	0	0	0	0	0	0	0	0
106M1	1	EPP Maevarano	2002-11-20	1	1	7	36.6	0	0	0	0	0	0	0	26	0	0	0	0	0	0	0	0	0	0	0	0	0	0	0	0	0
107M1	1	EPP Maevarano	2002-11-20	1	1	10	36.2	0	0	0	0	0	0	0	28	0	0	0	0	0	0	0	0	0	0	0	0	0	0	0	0	0
108M1	1	EPP Maevarano	2002-11-20	1	1	11	36.7	0	0	0	0	0	0	0	27	0	0	0	0	0	0	0	0	0	0	0	0	0	0	0	0	0
109M1	1	EPP Maevarano	2002-11-20	1	1	11	36.8	0	0	0	0	0	0	0	24	0	0	0	0	0	0	0	0	0	0	0	0	0	0	0	0	0
110M1	1	EPP Maevarano	2002-11-20	1	1	11	36.4	0	0	0	0	0	0	2	24	0	0	0	0	0	0	0	0	0	0	0	0	0	0	0	0	0
111M1	1	EPP Maevarano	2002-11-20	1	1	10	36.3	0	0	0	0	0	0	0	28	0	0	0	0	0	0	0	0	0	0	0	0	0	0	0	0	0
112M1	1	EPP Maevarano	2002-11-20	1	1	9	36.4	0	0	0	0	0	0	0	23	0	0	0	0	0	0	0	0	0	0	0	0	0	0	0	0	0
113M1	1	EPP Maevarano	2002-11-20	1	1	9	36	0	0	0	0	0	0	0	28	0	0	0	0	0	0	0	0	0	0	0	0	0	0	0	0	0
114M1	1	EPP Maevarano	2002-11-20	1	1	11	36.8	0	0	0	0	0	0	0	26	0	0	0	0	0	0	0	0	0	0	0	0	0	0	0	0	0
115M1	1	EPP Maevarano	2002-11-20	1	1	8	36	0	0	0	0	0	0	0	17	0	0	0	0	0	0	0	0	0	0	0	0	0	0	0	0	0
116M1	1	EPP Maevarano	2002-11-20	1	1	9	36.6	0	0	0	0	0	0	0	27	0	0	0	0	0	0	0	0	0	0	0	0	0	0	0	0	0
117M1	1	EPP Maevarano	2002-11-20	1	1	9	36.9	0	0	0	0	0	0	0	23	0	0	0	0	0	0	0	0	0	0	0	0	0	0	0	0	0
118M1	1	EPP Maevarano	2002-11-20	1	0	8	37.1	1	0	0	0	0	0	0	22	0	0	0	0	0	0	0	0	0	0	0	0	0	0	0	0	0
119M1	1	EPP Maevarano	2002-11-20	1	1	9	36.4	0	0	0	0	0	0	0	21	1	144	0	0	0	0	0	0	0	0	0	0	0	0	0	0	1
120M1	1	EPP Maevarano	2002-11-20	1	0	9	36.5	0	0	0	0	0	0	0	19	0	0	0	0	0	0	0	0	0	0	0	0	0	0	0	0	0
121M1	1	EPP Maevarano	2002-11-20	1	1	9	36.4	0	0	0	0	0	0	0	22	0	0	0	0	0	0	0	0	0	0	0	0	0	0	0	0	0
122M1	1	EPP Maevarano	2002-11-20	1	1	9	36.2	0	0	0	0	0	0	0	27	0	0	0	0	0	0	0	0	0	0	0	0	0	0	0	0	0
123M1	1	EPP Maevarano	2002-11-20	1	1	12	36.3	0	0	0	0	0	0	0	26	0	0	0	0	0	0	0	0	0	0	0	0	0	0	0	0	0
124M1	1	EPP Maevarano	2002-11-20	1	0	12	36.2	0	0	0	0	0	0	0	28	0	0	0	0	0	0	0	0	0	0	0	0	0	0	0	0	0
125M1	1	EPP Maevarano	2002-11-20	1	0	10	36.2	0	0	0	0	0	0	0	29	0	0	0	0	0	0	0	0	0	0	0	0	0	0	0	0	0
126M1	1	EPP Maevarano	2002-11-20	1	1	10	37.4	1	0	0	0	0	0	0	25	0	0	0	0	0	0	0	0	0	0	0	0	0	0	0	0	0
127M1	1	EPP Maevarano	2002-11-20	1	1	8	36.7	0	0	0	0	0	0	0	22	0	0	0	0	0	0	0	0	0	0	0	0	0	0	0	0	0
128M1	1	EPP Maevarano	2002-11-20	1	1	10	37.1	1	0	0	0	0	0	0	28	0	0	0	0	0	0	0	0	0	0	0	0	0	0	0	0	0
129M1	1	EPP Maevarano	2002-11-20	1	1	10	37.2	1	0	0	0	0	0	0	21	0	0	0	0	0	0	0	0	0	0	0	0	0	0	0	0	0
130M1	1	EPP Maevarano	2002-11-20	1	0	9	37.5	1	0	0	0	0	0	0	20	0	0	0	0	0	0	0	0	0	0	0	0	0	0	0	0	0
131M1	1	EPP Maevarano	2002-11-20	1	1	10	37.1	1	0	0	0	0	0	0	20	0	0	0	0	0	0	0	0	0	0	0	0	0	0	0	0	0
132M1	1	EPP Maevarano	2002-11-20	1	1	10	36.9	0	0	0	0	0	0	0	22	0	0	0	0	0	0	0	0	0	0	0	0	0	0	0	0	0
133M1	1	EPP Maevarano	2002-11-20	1	1	7	36.9	0	0	0	0	0	0	0	21	0	0	0	0	0	0	0	0	0	0	0	0	0	0	0	0	0
134M1	1	EPP Maevarano	2002-11-20	1	0	9	36.6	0	0	0	0	0	0	0	17	1	47	0	0	0	0	0	0	0	0	0	0	0	0	0	0	1
135M1	1	EPP Maevarano	2002-11-20	1	0	7	36.2	0	0	0	0	0	0	0	16	0	0	0	0	0	0	0	0	0	0	0	0	0	0	0	0	0
136M1	1	EPP Maevarano	2002-11-20	1	0	7	36.1	0	0	0	0	0	0	0	18	0	0	0	0	0	0	0	0	0	0	0	0	0	0	0	0	0
137M1	1	EPP Maevarano	2002-11-20	1	0	9	37.4	1	0	0	0	0	0	0	18	0	0	0	0	0	0	0	0	0	0	0	0	0	0	0	0	0
138M1	1	EPP Maevarano	2002-11-20	1	1	8	37.3	1	0	0	0	0	0	0	17	0	0	0	0	0	0	0	0	0	0	0	0	0	0	0	0	0
139M1	1	EPP Maevarano	2002-11-20	1	1	8	36.8	0	0	0	0	0	0	0	21	0	0	0	0	0	0	0	0	0	0	0	0	0	0	0	0	0
140M1	1	EPP Maevarano	2002-11-20	1	1	8	37.2	1	0	0	0	0	0	0	19	0	0	0	0	0	0	0	0	0	0	0	0	0	0	0	0	0
141M1	1	EPP Maevarano	2002-11-20	1	1	7	37.3	1	0	0	0	0	0	0	18	0	0	0	0	0	0	0	0	0	0	0	0	0	0	0	0	0
142M1	1	EPP Maevarano	2002-11-20	1	0	8	36.4	0	0	0	0	0	0	0	19	0	0	0	0	0	0	0	0	0	0	0	0	0	0	0	0	0
143M1	1	EPP Maevarano	2002-11-20	1	0	9	37.3	1	1	0	0	0	1	0	19	1	600	0	0	0	0	0	0	0	0	0	0	0	0	0	0	1
144M1	1	EPP Maevarano	2002-11-20	1	0	10	37.2	1	0	0	0	0	0	0	23	0	0	0	0	0	0	0	0	0	0	0	0	0	0	0	0	0
145M1	1	EPP Maevarano	2002-11-20	1	0	9	36.5	0	0	0	0	0	0	0	18	0	0	0	0	0	0	0	0	0	0	0	0	0	0	0	0	0
146M1	1	EPP Maevarano	2002-11-20	1	0	9	36.5	0	0	0	0	0	0	0	23	0	0	0	0	0	0	0	0	0	0	0	0	0	0	0	0	0
147M1	1	EPP Maevarano	2002-11-20	1	0	10	36.5	0	0	0	0	0	0	0	25	0	0	0	0	0	0	0	0	0	0	0	0	0	0	0	0	0
148M1	1	EPP Maevarano	2002-11-20	1	0	10	36	0	0	0	0	0	0	0	25	0	0	0	0	0	0	0	0	0	0	0	0	0	0	0	0	0
149M1	1	EPP Maevarano	2002-11-20	1	0	12	36.4	0	0	0	0	0	0	0	26	0	0	0	0	0	0	0	0	0	0	0	0	0	0	0	0	0
150M1	1	EPP Maevarano	2002-11-20	1	0	10	36.2	0	0	0	0	0	0	0	26	0	0	0	0	0	0	0	0	0	0	0	0	0	0	0	0	0
151M1	1	EPP Maevarano	2002-11-20	1	0	10	36.6	0	0	0	0	0	0	0	22	0	0	0	0	0	0	0	0	0	0	0	0	0	0	0	0	0
152M1	1	EPP Maevarano	2002-11-20	1	0	10	36.6	0	0	0	0	0	0	0	24	0	0	0	0	0	0	0	0	0	0	0	0	0	0	0	0	0
153M1	1	EPP Maevarano	2002-11-20	1	0	9	36.2	0	0	0	0	0	0	0	21	0	0	0	0	0	0	0	0	0	0	0	0	0	0	0	0	0
154M1	1	EPP Maevarano	2002-11-20	1	0	10	36.2	0	0	0	0	0	0	0	23	0	0	0	0	0	0	0	0	0	0	0	0	0	0	0	0	0
155M1	1	EPP Maevarano	2002-11-20	1	0	11	36.5	0	0	0	0	0	0	0	22	0	0	0	0	0	0	0	0	0	0	0	0	0	0	0	0	0
156M1	1	EPP Maevarano	2002-11-20	1	0	11	36.5	0	0	0	0	0	0	0	25	0	0	0	0	0	0	0	0	0	0	0	0	1	960	0	0	1
157M1	1	EPP Maevarano	2002-11-20	1	0	10	36.2	0	0	0	0	0	0	0	27	0	0	0	0	0	0	0	0	0	0	0	0	0	0	0	0	0
158M1	1	EPP Maevarano	2002-11-20	1	0	11	36.6	0	0	0	0	0	0	0	26	1	920	0	0	0	0	0	0	0	0	0	0	0	0	0	0	1
159M1	1	EPP Maevarano	2002-11-20	1	0	9	36.4	0	0	0	0	0	0	0	21	0	0	0	0	0	0	0	0	0	0	0	0	0	0	0	0	0
160M1	1	EPP Maevarano	2002-11-20	1	0	11	36.2	0	0	0	0	0	0	0	22	1	2680	0	0	0	0	0	0	0	0	0	0	0	0	0	0	1
161M1	1	EPP Maevarano	2002-11-20	1	0	9	36.3	0	0	0	0	0	0	0	22	0	0	0	0	0	0	0	0	0	0	0	0	0	0	0	0	0
162M1	1	EPP Maevarano	2002-11-20	1	0	12	36.8	0	0	0	0	0	0	0	30	0	0	0	0	0	0	0	0	0	0	0	0	0	0	0	0	0
163M1	1	EPP Maevarano	2002-11-20	1	0	12	35.9	0	0	0	0	0	0	0	32	0	0	0	0	0	0	0	0	0	0	0	0	0	0	0	0	0
164M1	1	EPP Maevarano	2002-11-20	1	0	12	36.7	0	0	0	0	0	0	0	32	0	0	0	0	0	0	0	0	0	0	0	0	0	0	0	0	0
165M1	1	EPP Maevarano	2002-11-20	1	0	12	36.4	0	0	0	0	0	0	0	28	0	0	0	0	0	0	0	0	0	0	0	0	0	0	0	0	0
166M1	1	EPP Maevarano	2002-11-20	1	0	12	36.9	0	0	0	0	0	0	0	34	0	0	0	0	0	0	0	0	0	0	0	0	0	0	0	0	0
167M1	1	EPP Maevarano	2002-11-20	1	0	8	36.6	0	0	0	0	0	0	0	20	0	0	0	0	0	0	0	0	0	0	0	0	0	0	0	0	0
168M1	1	EPP Maevarano	2002-11-20	1	0	9	36	0	0	0	0	0	0	0	25	0	0	0	0	0	0	0	0	0	0	0	0	0	0	0	0	0
169M1	1	EPP Maevarano	2002-11-20	1	1	12	36.5	0	0	0	0	0	0	0	26	0	0	0	0	0	0	0	0	0	0	0	0	0	0	0	0	0
170M1	1	EPP Maevarano	2002-11-20	1	1	12	36.9	0	0	0	0	0	0	0	25	0	0	0	0	0	0	0	0	0	0	0	0	0	0	0	0	0
171M1	1	EPP Maevarano	2002-11-20	1	1	12	36.8	0	0	0	0	0	0	0	27	0	0	0	0	0	0	0	0	0	0	0	0	0	0	0	0	0
172M1	1	EPP Maevarano	2002-11-20	1	1	11	37.3	1	0	0	0	0	0	0	27	0	0	0	0	0	0	0	0	0	0	0	0	0	0	0	0	0
173M1	1	EPP Maevarano	2002-11-20	1	1	12	36.8	0	0	0	0	0	0	0	25	0	0	0	0	0	0	0	0	0	0	0	0	0	0	0	0	0
174M1	1	EPP Maevarano	2002-11-20	1	1	10	36.2	0	0	0	0	0	0	0	27	0	0	0	0	0	0	0	0	0	0	0	0	0	0	0	0	0
175M1	1	EPP Maevarano	2002-11-20	1	1	11	37.3	1	0	0	0	0	0	0	32	0	0	0	0	0	0	0	0	0	0	0	0	0	0	0	0	0
176M1	1	EPP Maevarano	2002-11-20	1	1	11	36.2	0	0	0	0	0	0	0	30	0	0	0	0	0	0	0	0	0	0	0	0	0	0	0	0	0
177M1	1	EPP Maevarano	2002-11-20	1	1	12	36	0	0	0	0	0	0	0	25	0	0	0	0	0	0	0	0	0	0	0	0	0	0	0	0	0
178M1	1	EPP Maevarano	2002-11-20	1	1	12	36.4	0	0	0	0	0	0	0	22	0	0	0	0	0	0	0	0	0	0	0	0	0	0	0	0	0
179M1	1	EPP Maevarano	2002-11-20	1	1	11	36.8	0	0	0	0	0	0	0	25	0	0	0	0	0	0	0	0	0	0	0	0	0	0	0	0	0
180M1	1	EPP Maevarano	2002-11-20	1	1	11	35.8	0	0	0	0	0	0	0	33	0	0	0	0	0	0	0	0	0	0	0	0	0	0	0	0	0
181M1	1	EPP Maevarano	2002-11-20	1	1	10	36.2	0	0	0	0	0	0	0	30	0	0	0	0	0	0	0	0	0	0	0	0	0	0	0	0	0
182M1	1	EPP Maevarano	2002-11-20	1	1	10	36.7	0	0	0	0	0	0	0	25	0	0	0	0	0	0	0	0	0	0	0	0	0	0	0	0	0
183M1	1	EPP Maevarano	2002-11-20	1	1	10	36.2	0	0	0	0	0	0	0	27	0	0	0	0	0	0	0	0	0	0	0	0	0	0	0	0	0
184M1	1	EPP Maevarano	2002-11-20	1	1	12	36.7	0	0	0	0	0	0	0	27	0	0	0	0	0	0	0	0	0	0	0	0	0	0	0	0	0
185M1	1	EPP Maevarano	2002-11-20	1	1	10	36.2	0	0	0	0	0	0	2	24	0	0	0	0	0	0	0	0	0	0	0	0	0	0	0	0	0
186M1	1	EPP Maevarano	2002-11-20	1	1	11	36.8	0	0	0	0	0	0	0	23	0	0	0	0	0	0	0	0	0	0	0	0	0	0	0	0	0
187M1	1	EPP Maevarano	2002-11-20	1	1	9	36.4	0	0	0	0	0	0	0	22	1	400	0	0	0	0	0	0	0	0	0	0	0	0	0	0	1
188M1	1	EPP Maevarano	2002-11-20	1	1	9	36.6	0	0	0	0	0	0	0	23	0	0	0	0	0	0	0	0	0	0	0	0	0	0	0	0	0
189M1	1	EPP Ambararata	2002-11-20	1	0	6	36.9	0	0	0	0	0	0	0	14	0	0	0	0	0	0	0	0	0	0	0	0	0	0	0	0	0
190M1	1	EPP Ambararata	2002-11-20	1	0	6	37.6	1	0	0	0	0	0	0	18	0	0	0	0	0	0	0	0	0	0	0	0	0	0	0	0	0
191M1	1	EPP Ambararata	2002-11-20	1	0	6	37.3	1	0	0	0	0	0	0	19	0	0	0	0	0	0	0	0	0	0	0	0	0	0	0	0	0
192M1	1	EPP Ambararata	2002-11-20	1	0	6	37.4	1	0	0	0	0	0	0	15	0	0	0	0	0	0	0	0	0	0	0	0	0	0	0	0	0
193M1	1	EPP Ambararata	2002-11-20	1	0	7	39.2	1	0	0	0	0	0	0	16	0	0	0	0	0	0	0	0	0	0	0	0	0	0	0	0	0
194M1	1	EPP Ambararata	2002-11-20	1	0	7	36.5	0	0	0	0	0	0	0	19	1	64	0	0	0	0	0	0	0	0	0	0	0	0	0	0	1
195M1	1	EPP Ambararata	2002-11-20	1	0	7	37.3	1	0	0	0	0	0	0	17	0	0	0	0	0	0	0	0	0	0	0	0	0	0	0	0	0
196M1	1	EPP Ambararata	2002-11-20	1	1	7	37.4	1	0	0	0	0	0	0	20	0	0	0	0	0	0	0	0	0	0	0	0	0	0	0	0	0
197M1	1	EPP Ambararata	2002-11-20	1	1	7	37.6	1	0	0	0	0	0	0	20	0	0	0	0	0	0	0	0	0	0	0	0	0	0	0	0	0
198M1	1	EPP Ambararata	2002-11-20	1	1	8	37.3	1	0	0	0	0	0	0	19	0	0	0	0	0	0	0	0	0	0	0	0	0	0	0	0	0
199M1	1	EPP Ambararata	2002-11-20	1	1	8	37.5	1	0	0	0	0	0	0	21	0	0	0	0	0	0	0	0	0	0	0	0	0	0	0	0	0
200M1	1	EPP Ambararata	2002-11-20	1	0	8	37.3	1	0	0	0	0	0	0	19	0	0	0	0	0	0	0	0	0	0	0	0	0	0	0	0	0
201M1	1	EPP Ambararata	2002-11-20	1	0	8	36.9	0	0	0	0	0	0	0	19	1	48	0	0	0	0	0	0	0	0	0	0	0	0	0	0	1
202M1	1	EPP Ambararata	2002-11-20	1	0	8	37.7	1	0	0	0	0	0	0	17	0	0	0	0	0	0	0	0	0	0	0	0	0	0	0	0	0
203M1	1	EPP Ambararata	2002-11-20	1	0	9	38.9	1	0	0	0	0	0	0	20	0	0	0	0	0	0	0	0	0	0	0	0	0	0	0	0	0
204M1	1	EPP Ambararata	2002-11-20	1	0	9	37.2	1	0	0	0	0	0	0	24	0	0	0	0	0	0	0	0	0	0	0	0	0	0	0	0	0
205M1	1	EPP Ambararata	2002-11-20	1	0	9	36.7	0	0	0	0	0	0	0	24	0	0	0	0	0	0	0	0	0	0	0	0	0	0	0	0	0
206M1	1	EPP Ambararata	2002-11-20	1	0	9	37.1	1	0	0	0	0	0	0	25	0	0	0	0	0	0	0	0	0	0	0	0	0	0	0	0	0
207M1	1	EPP Ambararata	2002-11-20	1	0	10	37.2	1	0	0	0	0	0	0	22	0	0	0	0	0	0	0	0	0	0	0	0	0	0	0	0	0
208M1	1	EPP Ambararata	2002-11-20	1	1	10	37.6	1	0	0	0	0	0	0	21	0	0	0	0	0	0	0	0	0	0	0	0	0	0	0	0	0
209M1	1	EPP Ambararata	2002-11-20	1	1	10	36.2	0	0	0	0	0	0	0	26	0	0	0	0	0	0	0	0	0	0	0	0	0	0	0	0	0
210M1	1	EPP Ambararata	2002-11-20	1	1	10	37.5	1	0	0	0	0	0	0	15	0	0	0	0	0	0	0	0	0	0	0	0	0	0	0	0	0
211M1	1	EPP Ambararata	2002-11-20	1	1	10	37.2	1	0	0	0	0	0	0	19	0	0	0	0	0	0	0	0	0	0	0	0	0	0	0	0	0
212M1	1	EPP Ambararata	2002-11-20	1	1	10	36.8	0	0	0	0	0	0	0	20	0	0	0	0	0	0	0	0	0	0	0	0	0	0	0	0	0
213M1	1	EPP Ambararata	2002-11-20	1	1	10	36.4	1	0	0	0	0	0	0	17	0	0	0	0	0	0	0	0	0	0	0	0	0	0	0	0	0
214M1	1	EPP Ambararata	2002-11-20	1	1	10	37.1	1	0	0	0	0	0	0	25	0	0	0	0	0	0	0	0	0	0	0	0	0	0	0	0	0
215M1	1	EPP Ambararata	2002-11-20	1	0	10	37.2	1	1	0	0	0	1	0	26	1	48	0	0	0	0	0	0	0	0	0	0	0	0	0	0	1
216M1	1	EPP Ambararata	2002-11-20	1	1	10	37.2	1	0	0	0	0	0	0	22	0	0	0	0	0	0	0	0	0	0	0	0	0	0	0	0	0
217M1	1	EPP Ambararata	2002-11-20	1	1	10	36.2	0	0	0	0	0	0	0	23	0	0	0	0	0	0	0	0	0	0	0	0	0	0	0	0	0
218M1	1	EPP Ambararata	2002-11-20	1	1	10	36.6	0	0	0	0	0	0	0	25	0	0	0	0	0	0	0	0	0	0	0	0	0	0	0	0	0
219M1	1	EPP Ambararata	2002-11-20	1	1	10	36.6	0	0	0	0	0	0	0	20	0	0	0	0	0	0	0	0	0	0	0	0	0	0	0	0	0
220M1	1	EPP Ambararata	2002-11-20	1	1	10	36.9	0	0	0	0	0	0	0	22	0	0	0	0	0	0	0	0	0	0	0	0	0	0	0	0	0
221M1	1	EPP Ambararata	2002-11-20	1	0	10	37.1	1	0	0	0	0	0	0	17	0	0	0	0	0	0	0	0	0	0	0	0	0	0	0	0	0
222M1	1	EPP Ambararata	2002-11-20	1	0	9	37	1	0	0	0	0	0	0	20	0	0	0	0	0	0	0	0	0	0	0	0	0	0	0	0	0
223M1	1	EPP Ambararata	2002-11-20	1	1	10	36.1	0	0	0	0	0	0	0	22	1	32	0	0	0	0	0	0	0	0	0	0	0	0	0	0	1
224M1	1	EPP Ambararata	2002-11-20	1	1	11	36.7	0	0	0	0	0	0	0	23	0	0	0	0	0	0	0	0	0	0	0	0	0	0	0	0	0
225M1	1	EPP Ambararata	2002-11-20	1	1	9	37.6	1	0	0	0	0	0	0	20	0	0	0	0	0	0	0	0	0	0	0	0	0	0	0	0	0
226M1	1	EPP Ambararata	2002-11-20	1	0	7	36.7	0	0	0	0	0	0	0	24	0	0	0	0	0	0	0	0	0	0	0	0	0	0	0	0	0
227M1	1	EPP Ambararata	2002-11-20	1	1	11	37.2	1	1	0	0	0	1	0	24	1	228	1	16	0	0	0	0	0	0	0	0	0	0	0	0	1
228M1	1	EPP Ambararata	2002-11-20	1	1	11	37.9	1	0	0	0	0	0	0	22	0	0	0	0	0	0	0	0	0	0	0	0	0	0	0	0	0
229M1	1	EPP Ambararata	2002-11-20	1	1	11	36.4	0	0	0	0	0	0	0	27	1	128	0	0	0	0	0	0	0	0	0	0	0	0	0	0	1
230M1	1	EPP Ambararata	2002-11-20	1	1	11	38.9	1	0	0	0	0	0	0	26	0	0	0	0	0	0	0	0	0	0	0	0	0	0	0	0	0
1M2	1	EPP Soanierana	2003-01-28	2	1	6	37.3	1	0	0	0	0	0	0	17	0	0	0	0	0	0	0	0	0	0	0	0	0	0	0	0	0
2M2	1	EPP Soanierana	2003-01-28	2	1	6	36.8	0	0	0	0	0	0	2	17	1	3866.02	0	0	0	0	0	0	0	0	0	0	0	0	0	0	1
3M2	1	EPP Soanierana	2003-01-28	2	1	7	36.7	0	0	0	0	0	0	0	19	0	0	0	0	0	0	0	0	0	0	0	0	0	0	0	0	0
4M2	1	EPP Soanierana	2003-01-28	2	1	10	36.9	0	0	0	0	0	0	0	24	0	0	0	0	0	0	0	0	0	0	0	0	0	0	0	0	0
5M2	1	EPP Soanierana	2003-01-28	2	1	6	36.8	0	0	0	0	0	0	0	15	0	0	0	0	0	0	0	0	0	0	0	0	0	0	0	0	0
6M2	1	EPP Soanierana	2003-01-28	2	1	6	36.5	0	0	0	0	0	0	0	20	0	0	0	0	0	0	0	0	0	0	0	0	0	0	0	0	0
7M2	1	EPP Soanierana	2003-01-28	2	1	6	36.8	0	0	0	0	0	0	0	16	0	0	0	0	0	0	0	0	0	0	0	0	0	0	0	0	0
8M2	1	EPP Soanierana	2003-01-28	2	1	11	36.4	0	0	0	0	0	0	0	25	1	2058.25	0	0	0	0	0	0	0	0	0	0	0	0	0	0	1
9M2	1	EPP Soanierana	2003-01-28	2	1	9	36.8	0	0	0	0	0	0	0	21	0	0	0	0	0	0	0	0	0	0	0	0	0	0	0	0	0
10M2	1	EPP Soanierana	2003-01-28	2	1	7	37.3	1	0	0	0	0	0	0	15	0	0	0	0	0	0	0	0	0	0	0	0	0	0	0	0	0
13M2	1	EPP Soanierana	2003-01-28	2	1	7	37.1	1	0	0	0	0	0	0	19	0	0	0	0	0	0	0	0	0	0	0	0	0	0	0	0	0
14M2	1	EPP Soanierana	2003-01-28	2	1	7	36.7	0	0	0	0	0	0	0	18	0	0	0	0	0	0	0	0	0	0	0	0	0	0	0	0	0
15M2	1	EPP Soanierana	2003-01-28	2	1	9	36.8	0	0	0	0	0	0	0	19	0	0	0	0	0	0	0	0	0	0	0	0	0	0	0	0	0
16M2	1	EPP Soanierana	2003-01-28	2	1	8	37.5	1	0	0	0	0	0	0	19	0	0	0	0	0	0	0	0	0	0	0	0	0	0	0	0	0
17M2	1	EPP Soanierana	2003-01-28	2	1	8	37	1	1	0	0	0	1	2	23	1	472.9	0	0	0	0	0	0	0	0	0	0	0	0	0	0	1
18M2	1	EPP Soanierana	2003-01-28	2	0	6	36.9	0	0	0	0	0	0	0	17	0	0	0	0	0	0	0	0	0	0	0	0	0	0	0	0	0
19M2	1	EPP Soanierana	2003-01-28	2	0	6	36.8	0	0	0	0	0	0	2	17	0	0	0	0	0	0	0	0	0	0	0	0	0	0	0	0	0
21M2	1	EPP Soanierana	2003-01-28	2	0	6	37.4	1	0	0	0	0	0	0	14	0	0	0	0	0	0	0	0	0	0	0	0	0	0	0	0	0
22M2	1	EPP Soanierana	2003-01-28	2	0	6	36.2	0	0	0	0	0	0	0	15	0	0	0	0	0	0	0	0	0	0	0	0	0	0	0	0	0
23M2	1	EPP Soanierana	2003-01-28	2	0	7	36.2	0	0	0	0	0	0	0	20	0	0	0	0	0	0	0	0	0	0	0	0	0	0	0	0	0
24M2	1	EPP Soanierana	2003-01-28	2	0	6	37.1	1	0	0	0	0	0	0	20	0	0	0	0	0	0	0	0	0	0	0	0	0	0	0	0	0
25M2	1	EPP Soanierana	2003-01-28	2	0	6	36.2	0	0	0	0	0	0	0	16	0	0	0	0	0	0	0	0	0	0	0	0	0	0	0	0	0
26M2	1	EPP Soanierana	2003-01-28	2	0	7	36.9	0	0	0	0	0	0	2	19	0	0	0	0	0	0	0	0	0	0	0	0	1	431.37	0	0	1
27M2	1	EPP Soanierana	2003-01-28	2	0	6	36.9	0	0	0	0	0	0	0	15	0	0	0	0	0	0	0	0	0	0	0	0	0	0	0	0	0
28M2	1	EPP Soanierana	2003-01-28	2	0	6	36.8	0	0	0	0	0	0	0	16	0	0	0	0	0	0	0	0	0	0	0	0	0	0	0	0	0
29M2	1	EPP Soanierana	2003-01-28	2	0	6	36.6	0	0	0	0	0	0	0	14	0	0	0	0	0	0	0	0	0	0	0	0	0	0	0	0	0
30M2	1	EPP Soanierana	2003-01-28	2	0	7	36.7	0	0	0	0	0	0	0	16	0	0	0	0	0	0	0	0	0	0	0	0	1	4776.69	0	0	1
31M2	1	EPP Soanierana	2003-01-28	2	0	6	36.7	0	0	0	0	0	0	0	14	0	0	0	0	0	0	0	0	0	0	0	0	0	0	0	0	0
32M2	1	EPP Soanierana	2003-01-28	2	0	7	36.6	0	0	0	0	0	0	0	17	0	0	0	0	0	0	0	0	0	0	0	0	0	0	0	0	0
33M2	1	EPP Soanierana	2003-01-28	2	0	6	36.8	0	0	0	0	0	0	0	18	0	0	0	0	0	0	0	0	0	0	0	0	0	0	0	0	0
34M2	1	EPP Soanierana	2003-01-28	2	0	7	36.6	0	0	0	0	0	0	0	19	0	0	0	0	0	0	0	0	0	0	0	0	0	0	0	0	0
35M2	1	EPP Soanierana	2003-01-28	2	0	6	36.6	0	0	0	0	0	0	0	15	0	0	0	0	0	0	0	0	0	0	0	0	0	0	0	0	0
36M2	1	EPP Soanierana	2003-01-28	2	0	9	36.8	0	0	0	0	0	0	0	24	0	0	0	0	0	0	0	0	0	0	0	0	0	0	0	0	0
37M2	1	EPP Soanierana	2003-01-28	2	0	7	36.8	0	0	0	0	0	0	0	18	1	1169.81	0	0	0	0	0	0	0	0	0	0	0	0	0	0	1
38M2	1	EPP Soanierana	2003-01-28	2	0	6	36.8	0	0	0	0	0	0	0	15	0	0	0	0	0	0	0	0	0	0	0	0	0	0	0	0	0
39M2	1	EPP Soanierana	2003-01-28	2	1	6	36.7	0	0	0	0	0	0	0	14	0	0	0	0	0	0	0	0	0	0	0	0	0	0	0	0	0
40M2	1	EPP Soanierana	2003-01-28	2	1	6	36.6	0	0	0	0	0	0	0	15	0	0	0	0	0	0	0	0	0	0	0	0	0	0	0	0	0
41M2	1	EPP Soanierana	2003-01-28	2	1	6	36.7	0	0	0	0	0	0	0	16	0	0	0	0	0	0	0	0	0	0	0	0	1	461.53	0	0	1
42M2	1	EPP Soanierana	2003-01-28	2	1	6	36.4	0	0	0	0	0	0	0	17	0	0	0	0	0	0	0	0	0	0	0	0	0	0	0	0	0
43M2	1	EPP Soanierana	2003-01-28	2	1	7	36.7	0	0	0	0	0	0	0	17	0	0	0	0	0	0	0	0	0	0	0	0	0	0	0	0	0
44M2	1	EPP Soanierana	2003-01-28	2	1	7	36.7	0	0	0	0	0	0	0	16	0	0	0	0	0	0	0	0	0	0	0	0	0	0	0	0	0
45M2	1	EPP Soanierana	2003-01-28	2	1	7	36.3	0	0	0	0	0	0	0	18	1	1137.25	0	0	1	995.22	0	0	0	0	0	0	0	0	0	0	1
46M2	1	EPP Soanierana	2003-01-28	2	0	6	36	0	0	0	0	0	0	0	17	0	0	0	0	0	0	0	0	0	0	0	0	0	0	0	0	0
47M2	1	EPP Soanierana	2003-01-28	2	0	7	36.6	0	0	0	0	0	0	0	19	1	95.23	0	0	0	0	0	0	0	0	0	0	1	955.22	0	0	1
48M2	1	EPP Soanierana	2003-01-28	2	1	6	36.6	0	0	0	0	0	0	0	18	0	0	0	0	0	0	0	0	0	0	0	0	0	0	0	0	0
49M2	1	EPP Soanierana	2003-01-28	2	1	6	36.4	0	0	0	0	0	0	0	18	0	0	0	0	0	0	0	0	0	0	0	0	0	0	0	0	0
50M2	1	EPP Soanierana	2003-01-28	2	0	6	36.2	0	0	0	0	0	0	0	16	0	0	0	0	0	0	0	0	0	0	0	0	0	0	0	0	0
51M2	1	EPP Soanierana	2003-01-28	2	0	7	36.5	0	0	0	0	0	0	0	25	0	0	0	0	0	0	0	0	0	0	0	0	0	0	0	0	0
52M2	1	EPP Soanierana	2003-01-28	2	0	7	36.7	0	0	0	0	0	0	0	19	0	0	0	0	0	0	0	0	0	0	0	0	0	0	0	0	0
53M2	1	EPP Soanierana	2003-01-28	2	0	7	36.7	0	0	0	0	0	0	0	22	0	0	0	0	0	0	0	0	0	0	0	0	0	0	0	0	0
54M2	1	EPP Soanierana	2003-01-28	2	0	9	36.6	0	0	0	0	0	0	0	21	0	0	0	0	0	0	0	0	0	0	0	0	0	0	0	0	0
55M2	1	EPP Soanierana	2003-01-28	2	0	9	37.5	1	0	0	0	0	0	0	21	0	0	0	0	0	0	0	0	0	0	0	0	0	0	0	0	0
56M2	1	EPP Soanierana	2003-01-28	2	0	7	37.1	1	0	0	0	0	0	0	22	0	0	0	0	0	0	0	0	0	0	0	0	0	0	0	0	0
57M2	1	EPP Soanierana	2003-01-28	2	0	7	37.5	1	0	0	0	0	0	0	20	0	0	0	0	0	0	0	0	0	0	0	0	0	0	0	0	0
58M2	1	EPP Soanierana	2003-01-28	2	0	10	36.7	0	0	0	0	0	0	2	23	0	0	0	0	0	0	0	0	0	0	0	0	0	0	0	0	0
59M2	1	EPP Soanierana	2003-01-28	2	0	9	36.5	0	0	0	0	0	0	0	23	0	0	0	0	0	0	0	0	0	0	0	0	0	0	0	0	0
60M2	1	EPP Soanierana	2003-01-28	2	0	8	36.8	0	0	0	0	0	0	0	19	0	0	0	0	0	0	0	0	0	0	0	0	0	0	0	0	0
61M2	1	EPP Soanierana	2003-01-28	2	0	8	37.4	1	0	0	0	0	0	0	25	0	0	1	47.61	0	0	0	0	0	0	0	0	0	0	0	0	1
62M2	1	EPP Soanierana	2003-01-28	2	0	10	36.8	0	0	0	0	0	0	0	26	0	0	0	0	0	0	0	0	0	0	0	0	0	0	0	0	0
63M2	1	EPP Soanierana	2003-01-28	2	0	7	36.8	0	0	0	0	0	0	0	19	0	0	0	0	0	0	0	0	0	0	0	0	0	0	0	0	0
64M2	1	EPP Soanierana	2003-01-28	2	0	8	36.7	0	0	0	0	0	0	0	17	0	0	0	0	0	0	0	0	0	0	0	0	0	0	0	0	0
65M2	1	EPP Soanierana	2003-01-28	2	0	9	37.3	1	0	0	0	0	0	0	20	0	0	0	0	0	0	0	0	0	0	0	0	0	0	0	0	0
66M2	1	EPP Soanierana	2003-01-28	2	0	9	37.1	1	0	0	0	0	0	0	22	0	0	0	0	0	0	0	0	0	0	0	0	0	0	0	0	0
67M2	1	EPP Soanierana	2003-01-28	2	1	10	36.7	0	0	0	0	0	0	0	21	0	0	0	0	0	0	0	0	0	0	0	0	0	0	0	0	0
68M2	1	EPP Soanierana	2003-01-28	2	1	6	37.3	1	0	0	0	0	0	0	19	0	0	0	0	0	0	0	0	0	0	0	0	0	0	0	0	0
69M2	1	EPP Soanierana	2003-01-28	2	1	7	36.9	0	0	0	0	0	0	0	22	0	0	0	0	0	0	0	0	0	0	0	0	0	0	0	0	0
70M2	1	EPP Soanierana	2003-01-28	2	1	8	36.8	0	0	0	0	0	0	0	19	0	0	0	0	0	0	0	0	0	0	0	0	0	0	0	0	0
71M2	1	EPP Soanierana	2003-01-28	2	1	8	37.5	1	0	0	0	0	0	0	21	0	0	0	0	0	0	0	0	0	0	0	0	0	0	0	0	0
72M2	1	EPP Soanierana	2003-01-28	2	1	7	36.8	0	0	0	0	0	0	0	19	1	95.61	0	0	0	0	0	0	0	0	0	0	0	0	0	0	1
73M2	1	EPP Soanierana	2003-01-28	2	1	8	37.2	1	0	0	0	0	0	0	23	0	0	0	0	0	0	0	0	0	0	0	0	0	0	0	0	0
74M2	1	EPP Soanierana	2003-01-28	2	1	9	36.9	0	0	0	0	0	0	0	25	0	0	0	0	0	0	0	0	0	0	0	0	0	0	0	0	0
75M2	1	EPP Soanierana	2003-01-28	2	1	11	36.8	0	0	0	0	0	0	0	25	0	0	0	0	0	0	0	0	0	0	0	0	0	0	0	0	0
76M2	1	EPP Soanierana	2003-01-28	2	1	10	37.1	1	0	0	0	0	0	2	31	0	0	0	0	0	0	0	0	0	0	0	0	0	0	0	0	0
77M2	1	EPP Soanierana	2003-01-28	2	1	8	36.8	0	0	0	0	0	0	0	22	0	0	0	0	0	0	0	0	0	0	0	0	0	0	0	0	0
78M2	1	EPP Soanierana	2003-01-28	2	1	7	37.3	1	0	0	0	0	0	0	17	0	0	0	0	0	0	0	0	0	0	0	0	0	0	0	0	0
79M2	1	EPP Soanierana	2003-01-28	2	1	8	36.9	0	0	0	0	0	0	0	22	0	0	0	0	0	0	0	0	0	0	0	0	0	0	0	0	0
80M2	1	EPP Soanierana	2003-01-28	2	1	9	37	1	0	0	0	0	0	0	26	0	0	0	0	0	0	0	0	0	0	0	0	0	0	0	0	0
81M2	1	EPP Soanierana	2003-01-28	2	1	8	36.9	0	0	0	0	0	0	0	21	0	0	0	0	0	0	0	0	0	0	0	0	0	0	0	0	0
82M2	1	EPP Soanierana	2003-01-28	2	1	10	37.1	1	0	0	0	0	0	2	25	0	0	0	0	0	0	0	0	0	0	0	0	0	0	0	0	0
83M2	1	EPP Soanierana	2003-01-28	2	1	10	37.1	1	0	0	0	0	0	2	25	0	0	0	0	0	0	0	0	0	0	0	0	0	0	0	0	0
84M2	1	EPP Soanierana	2003-01-28	2	1	10	37.2	1	0	0	0	0	0	0	25	0	0	0	0	0	0	0	0	0	0	0	0	0	0	0	0	0
85M2	1	EPP Soanierana	2003-01-28	2	1	10	36.9	0	0	0	0	0	0	0	29	0	0	0	0	0	0	0	0	0	0	0	0	0	0	0	0	0
86M2	1	EPP Soanierana	2003-01-28	2	1	11	37.2	1	0	0	0	0	0	0	25	0	0	0	0	0	0	0	0	0	0	0	0	0	0	0	0	0
87M2	1	EPP Soanierana	2003-01-28	2	0	10	37.4	1	0	0	0	0	0	0	22	0	0	0	0	0	0	0	0	0	0	0	0	0	0	0	0	0
88M2	1	EPP Soanierana	2003-01-28	2	0	10	37.6	1	0	0	0	0	0	0	24	0	0	0	0	0	0	0	0	0	0	0	0	0	0	0	0	0
89M2	1	EPP Soanierana	2003-01-28	2	0	10	36.9	0	0	0	0	0	0	0	24	0	0	0	0	0	0	0	0	0	0	0	0	0	0	0	0	0
90M2	1	EPP Soanierana	2003-01-28	2	0	10	36.9	0	0	0	0	0	0	0	25	0	0	0	0	0	0	0	0	0	0	0	0	0	0	0	0	0
91M2	1	EPP Soanierana	2003-01-28	2	0	11	36.5	0	0	0	0	0	0	0	28	0	0	0	0	0	0	0	0	0	0	0	0	0	0	0	0	0
92M2	1	EPP Soanierana	2003-01-28	2	0	12	37.5	1	0	0	0	0	0	0	26	0	0	0	0	0	0	0	0	0	0	0	0	0	0	0	0	0
93M2	1	EPP Soanierana	2003-01-28	2	0	11	36.5	0	0	0	0	0	0	0	36	0	0	0	0	0	0	0	0	0	0	0	0	0	0	0	0	0
94M2	1	EPP Soanierana	2003-01-28	2	0	11	36.9	0	0	0	0	0	0	0	26	0	0	0	0	0	0	0	0	0	0	0	0	0	0	0	0	0
95M2	1	EPP Soanierana	2003-01-28	2	0	11	37.5	1	0	0	0	1	1	0	27	0	0	0	0	0	0	0	0	0	0	0	0	1	2796.11	0	0	1
96M2	1	EPP Soanierana	2003-01-28	2	0	11	36.9	0	0	0	0	0	0	0	29	0	0	0	0	0	0	0	0	0	0	0	0	0	0	0	0	0
97M2	1	EPP Soanierana	2003-01-28	2	0	11	37	1	0	0	0	0	0	0	34	0	0	0	0	0	0	0	0	0	0	0	0	0	0	0	0	0
98M2	1	EPP Soanierana	2003-01-28	2	0	11	37.5	1	0	0	0	0	0	0	28	0	0	0	0	0	0	0	0	0	0	0	0	0	0	0	0	0
99M2	1	EPP Soanierana	2003-01-28	2	0	11	37.1	1	1	0	0	0	1	0	26	1	429.26	0	0	0	0	0	0	0	0	0	0	0	0	0	0	1
100M2	1	EPP Soanierana	2003-01-28	2	0	11	37.8	1	0	0	0	0	0	0	39	0	0	0	0	0	0	0	0	0	0	0	0	0	0	0	0	0
101M2	1	EPP Maevarano	2003-01-30	2	0	6	36.8	0	0	0	0	0	0	0	21	0	0	0	0	0	0	0	0	0	0	0	0	0	0	0	0	0
102M2	1	EPP Maevarano	2003-01-30	2	0	6	37.2	1	0	0	0	0	0	0	22	0	0	0	0	0	0	0	0	0	0	0	0	0	0	0	0	0
103M2	1	EPP Maevarano	2003-01-30	2	1	7	37	1	0	0	0	0	0	0	23	0	0	0	0	0	0	0	0	0	0	0	0	0	0	0	0	0
104M2	1	EPP Maevarano	2003-01-30	2	1	8	36.8	0	0	0	0	0	0	0	21	0	0	0	0	0	0	0	0	0	0	0	0	0	0	0	0	0
105M2	1	EPP Maevarano	2003-01-30	2	1	8	37	1	0	0	0	0	0	0	21	0	0	0	0	0	0	0	0	0	0	0	0	0	0	0	0	0
106M2	1	EPP Maevarano	2003-01-30	2	1	7	36.4	0	0	0	0	0	0	2	17	1	2047.39	0	0	0	0	0	0	0	0	0	0	0	0	0	0	1
107M2	1	EPP Maevarano	2003-01-30	2	1	7	36.7	0	0	0	0	0	0	0	19	0	0	0	0	0	0	0	0	0	0	0	0	0	0	0	0	0
108M2	1	EPP Maevarano	2003-01-30	2	1	8	37.2	1	1	0	0	0	1	0	24	1	815.53	0	0	0	0	0	0	0	0	0	0	0	0	0	0	1
109M2	1	EPP Maevarano	2003-01-30	2	1	8	37.7	1	0	0	0	0	0	0	19	0	0	0	0	0	0	0	0	0	0	0	0	0	0	0	0	0
110M2	1	EPP Maevarano	2003-01-30	2	1	7	37.6	1	0	0	0	0	0	0	21	0	0	0	0	0	0	0	0	0	0	0	0	0	0	0	0	0
111M2	1	EPP Maevarano	2003-01-30	2	0	8	36.6	0	0	0	0	0	0	0	17	0	0	0	0	0	0	0	0	0	0	0	0	0	0	0	0	0
112M2	1	EPP Maevarano	2003-01-30	2	0	7	36.7	0	0	0	0	0	0	0	18	0	0	0	0	0	0	0	0	0	0	0	0	0	0	0	0	0
113M2	1	EPP Maevarano	2003-01-30	2	1	8	37.4	1	0	0	0	0	0	0	18	0	0	0	0	0	0	0	0	0	0	0	0	0	0	0	0	0
114M2	1	EPP Maevarano	2003-01-30	2	1	6	36.7	0	0	0	0	0	0	0	17	0	0	0	0	0	0	0	0	0	0	0	0	0	0	0	0	0
115M2	1	EPP Maevarano	2003-01-30	2	0	7	37.2	1	0	0	0	0	0	0	19	0	0	0	0	0	0	0	0	0	0	0	0	0	0	0	0	0
116M2	1	EPP Maevarano	2003-01-30	2	1	8	36.8	0	0	0	0	0	0	0	21	0	0	0	0	0	0	0	0	0	0	0	0	0	0	0	0	0
117M2	1	EPP Maevarano	2003-01-30	2	1	6	37.3	1	0	0	0	0	0	0	18	0	0	0	0	0	0	0	0	0	0	0	0	0	0	0	0	0
118M2	1	EPP Maevarano	2003-01-30	2	1	6	36.9	0	0	0	0	0	0	0	18	0	0	0	0	0	0	0	0	0	0	0	0	0	0	0	0	0
119M2	1	EPP Maevarano	2003-01-30	2	1	7	36.8	0	0	0	0	0	0	0	19	0	0	0	0	0	0	0	0	0	0	0	0	0	0	0	0	0
120M2	1	EPP Maevarano	2003-01-30	2	1	6	36.6	0	0	0	0	0	0	0	16	0	0	0	0	0	0	0	0	0	0	0	0	0	0	0	0	0
121M2	1	EPP Maevarano	2003-01-30	2	1	9	36.8	0	0	0	0	0	0	0	23	0	0	0	0	0	0	0	0	0	0	0	0	0	0	0	0	0
122M2	1	EPP Maevarano	2003-01-30	2	1	6	36.7	0	0	0	0	0	0	0	16	0	0	0	0	0	0	0	0	0	0	0	0	0	0	0	0	0
123M2	1	EPP Maevarano	2003-01-30	2	1	9	36.7	0	0	0	0	0	0	2	21	1	2161.13	0	0	0	0	0	0	0	0	0	0	0	0	0	0	1
124M2	1	EPP Maevarano	2003-01-30	2	1	8	36.2	0	0	0	0	0	0	0	21	0	0	0	0	0	0	0	0	0	0	0	0	0	0	0	0	0
125M2	1	EPP Maevarano	2003-01-30	2	1	7	37.6	1	0	0	0	0	0	0	20	0	0	0	0	0	0	0	0	0	0	0	0	0	0	0	0	0
126M2	1	EPP Maevarano	2003-01-30	2	1	8	37.1	1	0	0	0	0	0	0	19	0	0	0	0	0	0	0	0	0	0	0	0	0	0	0	0	0
127M2	1	EPP Maevarano	2003-01-30	2	0	7	36.2	0	0	0	0	0	0	0	19	0	0	0	0	0	0	0	0	0	0	0	0	0	0	0	0	0
128M2	1	EPP Maevarano	2003-01-30	2	0	7	36.7	0	0	0	0	0	0	0	19	0	0	0	0	0	0	0	0	0	0	0	0	0	0	0	0	0
129M2	1	EPP Maevarano	2003-01-30	2	0	6	36.5	0	0	0	0	0	0	0	18	1	457.14	1	47.43	0	0	0	0	0	0	0	0	0	0	0	0	1
130M2	1	EPP Maevarano	2003-01-30	2	0	8	36.2	0	0	0	0	0	0	0	22	0	0	0	0	0	0	0	0	0	0	0	0	0	0	0	0	0
131M2	1	EPP Maevarano	2003-01-30	2	0	8	36.5	0	0	0	0	0	0	0	15	0	0	0	0	0	0	0	0	0	0	0	0	0	0	0	0	0
132M2	1	EPP Maevarano	2003-01-30	2	0	6	37.8	1	0	0	0	0	0	0	17	0	0	0	0	0	0	0	0	0	0	0	0	0	0	0	0	0
133M2	1	EPP Maevarano	2003-01-30	2	0	8	36.6	0	0	0	0	0	0	0	16	0	0	0	0	0	0	0	0	0	0	0	0	0	0	0	0	0
134M2	1	EPP Maevarano	2003-01-30	2	1	10	36.7	0	0	0	0	0	0	0	30	0	0	0	0	0	0	0	0	0	0	0	0	0	0	0	0	0
135M2	1	EPP Maevarano	2003-01-30	2	1	10	36.6	0	0	0	0	0	0	0	23	0	0	0	0	0	0	0	0	0	0	0	0	0	0	0	0	0
136M2	1	EPP Maevarano	2003-01-30	2	1	10	37.1	1	0	0	0	0	0	0	25	0	0	0	0	0	0	0	0	0	0	0	0	0	0	0	0	0
137M2	1	EPP Maevarano	2003-01-30	2	1	12	36.3	0	0	0	0	0	0	0	25	0	0	0	0	0	0	0	0	0	0	0	0	0	0	0	0	0
138M2	1	EPP Maevarano	2003-01-30	2	1	12	36.4	0	0	0	0	0	0	0	34	1	970.87	0	0	0	0	0	0	0	0	0	0	0	0	0	0	1
139M2	1	EPP Maevarano	2003-01-30	2	1	12	36.9	0	0	0	0	0	0	0	26	0	0	1	95.23	0	0	0	0	0	0	0	0	0	0	0	0	1
140M2	1	EPP Maevarano	2003-01-30	2	1	10	36.8	0	0	0	0	0	0	0	23	0	0	0	0	0	0	0	0	0	0	0	0	0	0	0	0	0
141M2	1	EPP Maevarano	2003-01-30	2	1	12	36.6	0	0	0	0	0	0	0	23	0	0	0	0	0	0	0	0	0	0	0	0	0	0	0	0	0
142M2	1	EPP Maevarano	2003-01-30	2	1	10	36.9	0	0	0	0	0	0	0	22	0	0	0	0	0	0	0	0	0	0	0	0	0	0	0	0	0
143M2	1	EPP Maevarano	2003-01-30	2	1	8	37.2	1	0	0	0	0	0	0	19	0	0	0	0	0	0	0	0	0	0	0	0	0	0	0	0	0
144M2	1	EPP Maevarano	2003-01-30	2	1	10	36.9	0	0	0	0	0	0	0	24	0	0	0	0	0	0	0	0	0	0	0	0	0	0	0	0	0
145M2	1	EPP Maevarano	2003-01-30	2	1	10	36.2	0	0	0	0	0	0	2	19	0	0	0	0	0	0	0	0	0	0	0	0	0	0	0	0	0
146M2	1	EPP Maevarano	2003-01-30	2	1	10	37.2	1	0	0	0	0	0	0	22	0	0	0	0	0	0	0	0	0	0	0	0	0	0	0	0	0
147M2	1	EPP Maevarano	2003-01-30	2	0	8	36.2	0	0	0	0	0	0	0	25	0	0	0	0	0	0	0	0	0	0	0	0	0	0	0	0	0
148M2	1	EPP Maevarano	2003-01-30	2	0	12	36.7	0	0	0	0	0	0	2	31	0	0	0	0	0	0	0	0	0	0	0	0	0	0	0	0	0
149M2	1	EPP Maevarano	2003-01-30	2	0	11	36.8	0	0	0	0	0	0	0	22	0	0	0	0	0	0	0	0	0	0	0	0	0	0	0	0	0
150M2	1	EPP Maevarano	2003-01-30	2	0	12	36.2	0	0	0	0	0	0	0	34	0	0	0	0	0	0	0	0	0	0	0	0	0	0	0	0	0
201M2	1	EPP Maevarano	2003-01-30	2	0	11	36.7	0	0	0	0	0	0	0	25	0	0	0	0	0	0	0	0	0	0	0	0	0	0	0	0	0
202M2	1	EPP Maevarano	2003-01-30	2	0	11	36.5	0	0	0	0	0	0	0	27	0	0	0	0	0	0	0	0	0	0	0	0	0	0	0	0	0
203M2	1	EPP Maevarano	2003-01-30	2	0	12	36.3	0	0	0	0	0	0	0	29	0	0	0	0	0	0	0	0	0	0	0	0	0	0	0	0	0
204M2	1	EPP Maevarano	2003-01-30	2	0	9	36.8	0	0	0	0	0	0	0	18	0	0	0	0	0	0	0	0	0	0	0	0	0	0	0	0	0
205M2	1	EPP Maevarano	2003-01-30	2	0	11	36.5	0	0	0	0	0	0	0	21	0	0	0	0	0	0	0	0	0	0	0	0	0	0	0	0	0
206M2	1	EPP Maevarano	2003-01-30	2	0	10	36.4	0	0	0	0	0	0	0	24	1	1203.88	0	0	0	0	0	0	0	0	0	0	0	0	0	0	1
207M2	1	EPP Maevarano	2003-01-30	2	0	10	36.9	0	0	0	0	0	0	0	24	0	0	0	0	0	0	0	0	0	0	0	0	0	0	0	0	0
208M2	1	EPP Maevarano	2003-01-30	2	0	8	37.2	1	0	0	0	0	0	0	21	0	0	0	0	0	0	0	0	0	0	0	0	0	0	0	0	0
209M2	1	EPP Maevarano	2003-01-30	2	0	9	36.7	0	0	0	0	0	0	0	20	1	127.49	1	79.68	0	0	0	0	0	0	0	0	0	0	0	0	1
210M2	1	EPP Maevarano	2003-01-30	2	0	9	37	1	0	0	0	0	0	0	20	0	0	0	0	0	0	0	0	0	0	0	0	0	0	0	0	0
211M2	1	EPP Maevarano	2003-01-30	2	0	12	36.8	0	0	0	0	0	0	0	28	0	0	0	0	0	0	0	0	0	0	0	0	0	0	0	0	0
151M2	1	EPP Maevarano	2003-01-30	2	0	11	36.9	0	0	0	0	0	0	0	36	0	0	0	0	0	0	0	0	0	0	0	0	0	0	0	0	0
152M2	1	EPP Maevarano	2003-01-30	2	0	10	36.8	0	0	0	0	0	0	0	30	0	0	0	0	0	0	0	0	0	0	0	0	0	0	0	0	0
153M2	1	EPP Maevarano	2003-01-30	2	0	10	36.9	0	0	0	0	0	0	0	24	1	111.11	0	0	0	0	0	0	0	0	0	0	0	0	0	0	1
154M2	1	EPP Maevarano	2003-01-30	2	0	10	36.7	0	0	0	0	0	0	0	29	0	0	0	0	0	0	0	0	0	0	0	0	0	0	0	0	0
155M2	1	EPP Maevarano	2003-01-30	2	0	10	36.5	0	0	0	0	0	0	0	28	1	1180.95	0	0	0	0	0	0	0	0	0	0	0	0	0	0	1
156M2	1	EPP Maevarano	2003-01-30	2	0	10	36.8	0	0	0	0	0	0	0	28	0	0	0	0	0	0	0	0	0	0	0	0	0	0	0	0	0
157M2	1	EPP Maevarano	2003-01-30	2	1	12	37.1	1	0	0	0	0	0	0	28	0	0	0	0	0	0	0	0	0	0	0	0	0	0	0	0	0
158M2	1	EPP Maevarano	2003-01-30	2	0	8	36.8	0	0	0	0	0	0	0	21	0	0	0	0	0	0	0	0	0	0	0	0	0	0	0	0	0
159M2	1	EPP Maevarano	2003-01-30	2	1	6	37.2	1	0	0	0	0	0	0	19	0	0	0	0	0	0	0	0	0	0	0	0	0	0	0	0	0
160M2	1	EPP Maevarano	2003-01-30	2	0	6	36.8	0	0	0	0	0	0	0	18	1	93.93	0	0	0	0	0	0	0	0	0	0	0	0	0	0	1
161M2	1	EPP Maevarano	2003-01-30	2	0	7	37.5	1	0	0	0	0	0	0	18	0	0	0	0	0	0	0	0	0	0	0	0	0	0	0	0	0
162M2	1	EPP Maevarano	2003-01-30	2	0	6	37.3	1	0	0	0	0	0	0	20	0	0	0	0	0	0	0	0	0	0	0	0	0	0	0	0	0
163M2	1	EPP Maevarano	2003-01-30	2	0	7	37.1	1	0	0	0	0	0	0	18	0	0	0	0	0	0	0	0	0	0	0	0	0	0	0	0	0
164M2	1	EPP Maevarano	2003-01-30	2	0	8	37.3	1	0	0	0	0	0	0	20	0	0	0	0	0	0	0	0	0	0	0	0	0	0	0	0	0
165M2	1	EPP Maevarano	2003-01-30	2	0	7	37.3	1	0	0	0	0	0	0	19	0	0	0	0	0	0	0	0	0	0	0	0	0	0	0	0	0
166M2	1	EPP Maevarano	2003-01-30	2	0	7	37.4	1	0	0	0	0	0	0	20	0	0	0	0	0	0	0	0	0	0	0	0	0	0	0	0	0
167M2	1	EPP Maevarano	2003-01-30	2	0	6	36.8	0	0	0	0	0	0	0	17	0	0	0	0	0	0	0	0	0	0	0	0	0	0	0	0	0
168M2	1	EPP Maevarano	2003-01-30	2	0	8	38	1	1	0	0	0	1	0	20	1	538.46	0	0	0	0	0	0	0	0	0	0	0	0	0	0	1
169M2	1	EPP Maevarano	2003-01-30	2	1	8	37.8	1	0	0	0	0	0	0	19	0	0	0	0	0	0	0	0	0	0	0	0	0	0	0	0	0
170M2	1	EPP Maevarano	2003-01-30	2	0	7	37.6	1	0	0	0	0	0	0	19	0	0	0	0	0	0	0	0	0	0	0	0	0	0	0	0	0
171M2	1	EPP Maevarano	2003-01-30	2	1	8	37.5	1	0	0	0	0	0	0	20	0	0	0	0	0	0	0	0	0	0	0	0	0	0	0	0	0
172M2	1	EPP Maevarano	2003-01-30	2	0	6	36.5	0	0	0	0	0	0	0	19	0	0	0	0	0	0	0	0	0	0	0	0	0	0	0	0	0
173M2	1	EPP Maevarano	2003-01-30	2	1	6	37.2	1	0	0	0	0	0	0	20	0	0	0	0	0	0	0	0	0	0	0	0	0	0	0	0	0
174M2	1	EPP Maevarano	2003-01-30	2	1	6	37.1	1	0	0	0	0	0	0	18	0	0	0	0	0	0	0	0	0	0	0	0	0	0	0	0	0
175M2	1	EPP Maevarano	2003-01-30	2	1	6	36.8	0	0	0	0	0	0	0	15	0	0	0	0	0	0	0	0	0	0	0	0	0	0	0	0	0
176M2	1	EPP Maevarano	2003-01-30	2	1	7	37.2	1	0	0	0	0	0	0	18	0	0	0	0	0	0	0	0	0	0	0	0	0	0	0	0	0
177M2	1	EPP Maevarano	2003-01-30	2	1	7	37.1	1	0	0	0	0	0	0	19	0	0	0	0	0	0	0	0	0	0	0	0	0	0	0	0	0
178M2	1	EPP Maevarano	2003-01-30	2	1	6	37.5	1	0	0	0	0	0	0	18	0	0	0	0	0	0	0	0	0	0	0	0	0	0	0	0	0
179M2	1	EPP Maevarano	2003-01-30	2	0	6	37.2	1	0	0	0	0	0	0	15	0	0	0	0	0	0	0	0	0	0	0	0	0	0	0	0	0
180M2	1	EPP Maevarano	2003-01-30	2	0	6	36.9	0	0	0	0	0	0	0	16	0	0	0	0	0	0	0	0	0	0	0	0	0	0	0	0	0
181M2	1	EPP Maevarano	2003-01-30	2	0	7	36.9	0	0	0	0	0	0	0	18	1	2434.78	0	0	0	0	0	0	0	0	0	0	0	0	0	0	1
182M2	1	EPP Maevarano	2003-01-30	2	1	6	37.6	1	0	0	0	0	0	0	20	0	0	0	0	0	0	0	0	0	0	0	0	0	0	0	0	0
183M2	1	EPP Maevarano	2003-01-30	2	0	6	37	1	0	0	0	0	0	0	15	0	0	0	0	0	0	0	0	0	0	0	0	0	0	0	0	0
184M2	1	EPP Maevarano	2003-01-30	2	0	6	37.2	1	1	0	0	0	1	0	16	1	4019.9	0	0	0	0	0	0	0	0	0	0	0	0	0	0	1
185M2	1	EPP Maevarano	2003-01-30	2	0	6	37.1	1	0	0	0	0	0	0	16	0	0	0	0	0	0	0	0	0	0	0	0	0	0	0	0	0
186M2	1	EPP Maevarano	2003-01-30	2	0	8	37.1	1	0	0	0	0	0	2	19	0	0	0	0	0	0	0	0	0	0	0	0	0	0	0	0	0
187M2	1	EPP Maevarano	2003-01-30	2	0	6	36.9	0	0	0	0	0	0	0	17	0	0	0	0	0	0	0	0	0	0	0	0	0	0	0	0	0
188M2	1	EPP Maevarano	2003-01-30	2	1	10	36.6	0	0	0	0	0	0	0	22	0	0	0	0	0	0	0	0	0	0	0	0	0	0	0	0	0
189M2	1	EPP Maevarano	2003-01-30	2	1	8	36.8	0	0	0	0	0	0	0	19	0	0	0	0	0	0	0	0	0	0	0	0	0	0	0	0	0
190M2	1	EPP Maevarano	2003-01-30	2	1	8	36.8	0	0	0	0	0	0	0	18	0	0	0	0	0	0	0	0	0	0	0	0	0	0	0	0	0
191M2	1	EPP Maevarano	2003-01-30	2	0	8	37.1	1	0	0	0	0	0	0	17	0	0	0	0	0	0	0	0	0	0	0	0	0	0	0	0	0
192M2	1	EPP Maevarano	2003-01-30	2	1	9	36.6	0	0	0	0	0	0	0	23	0	0	0	0	0	0	0	0	0	0	0	0	0	0	0	0	0
193M2	1	EPP Maevarano	2003-01-30	2	0	8	37.5	1	0	0	0	0	0	0	17	0	0	0	0	0	0	0	0	0	0	0	0	0	0	0	0	0
194M2	1	EPP Maevarano	2003-01-30	2	1	8	36.9	0	0	0	0	0	0	0	21	0	0	0	0	0	0	0	0	0	0	0	0	0	0	0	0	0
195M2	1	EPP Maevarano	2003-01-30	2	1	8	37.5	1	0	0	0	0	0	0	20	0	0	0	0	0	0	0	0	0	0	0	0	0	0	0	0	0
196M2	1	EPP Maevarano	2003-01-30	2	1	10	37.6	1	0	0	0	0	0	0	27	0	0	0	0	0	0	0	0	0	0	0	0	0	0	0	0	0
197M2	1	EPP Maevarano	2003-01-30	2	1	8	36.7	0	0	0	0	0	0	0	17	0	0	0	0	0	0	0	0	0	0	0	0	0	0	0	0	0
198M2	1	EPP Maevarano	2003-01-30	2	1	11	37.4	1	1	0	0	0	1	0	27	1	94.11	0	0	0	0	0	0	0	0	0	0	0	0	0	0	1
199M2	1	EPP Maevarano	2003-01-30	2	1	8	37.5	1	0	0	0	0	0	0	19	0	0	0	0	0	0	0	0	0	0	0	0	0	0	0	0	0
200M2	1	EPP Maevarano	2003-01-30	2	1	11	36.8	0	0	0	0	0	0	0	26	0	0	0	0	0	0	0	0	0	0	0	0	0	0	0	0	0
212M2	1	EPP Maevarano	2003-01-30	2	1	9	37.3	1	0	0	0	0	0	2	21	0	0	0	0	0	0	0	0	0	0	0	0	0	0	0	0	0
213M2	1	EPP Maevarano	2003-01-30	2	1	7	37.3	1	1	0	0	0	1	0	21	1	470.58	0	0	0	0	0	0	0	0	0	0	0	0	0	0	1
214M2	1	EPP Maevarano	2003-01-30	2	1	11	37.9	1	1	0	0	0	1	0	29	1	2280.19	0	0	0	0	0	0	0	0	0	0	0	0	0	0	1
215M2	1	EPP Maevarano	2003-01-30	2	1	8	37.5	1	0	0	0	0	0	0	19	0	0	0	0	0	0	0	0	0	0	0	0	0	0	0	0	0
216M2	1	EPP Maevarano	2003-01-30	2	1	9	38.9	1	1	0	0	0	1	0	20	1	461.53	0	0	0	0	0	0	0	0	0	0	0	0	0	0	1
217M2	1	EPP Maevarano	2003-01-30	2	1	8	36.8	0	0	0	0	0	0	0	18	0	0	0	0	0	0	0	0	0	0	0	0	0	0	0	0	0
218M2	1	EPP Maevarano	2003-01-30	2	1	8	37.1	1	0	0	0	0	0	0	22	0	0	0	0	0	0	0	0	0	0	0	0	0	0	0	0	0
1S1	2	SKP Ambohitromby	2002-11-19	1	1	6	36.2	0	0	0	0	0	0	0	13	0	0	0	0	0	0	0	0	0	0	0	0	0	0	0	0	0
2S1	2	SKP Ambohitromby	2002-11-19	1	0	6	36.4	0	0	0	0	0	0	0	17	0	0	0	0	0	0	0	0	0	0	0	0	0	0	0	0	0
3S1	2	SKP Ambohitromby	2002-11-19	1	0	6	37.2	1	0	0	0	0	0	0	15	0	0	0	0	0	0	0	0	0	0	0	0	0	0	0	0	0
4S1	2	SKP Ambohitromby	2002-11-19	1	0	8	37.2	1	0	0	0	0	0	0	18	0	0	0	0	0	0	0	0	0	0	0	0	0	0	0	0	0
5S1	2	SKP Ambohitromby	2002-11-19	1	0	6	36.9	0	0	0	0	0	0	0	20	0	0	0	0	0	0	0	0	0	0	0	0	0	0	0	0	0
6S1	2	SKP Ambohitromby	2002-11-19	1	0	6	36.6	0	0	0	0	0	0	0	18	0	0	0	0	0	0	0	0	0	0	0	0	0	0	0	0	0
7S1	2	SKP Ambohitromby	2002-11-19	1	0	8	37	1	0	0	0	0	0	0	17	0	0	0	0	0	0	0	0	0	0	0	0	0	0	0	0	0
8S1	2	SKP Ambohitromby	2002-11-19	1	0	7	36.8	0	0	0	0	0	0	0	17	0	0	0	0	0	0	0	0	0	0	0	0	0	0	0	0	0
9S1	2	SKP Ambohitromby	2002-11-19	1	0	9	36.9	0	0	0	0	0	0	0	24	0	0	0	0	0	0	0	0	0	0	0	0	0	0	0	0	0
10S1	2	SKP Ambohitromby	2002-11-19	1	1	9	36.2	0	0	0	0	0	0	0	23	0	0	0	0	0	0	0	0	0	0	0	0	0	0	0	0	0
11S1	2	SKP Ambohitromby	2002-11-19	1	0	8	36.4	0	0	0	0	0	0	0	22	0	0	0	0	0	0	0	0	0	0	0	0	0	0	0	0	0
12S1	2	SKP Ambohitromby	2002-11-19	1	0	10	36.7	0	0	0	0	0	0	0	22	0	0	0	0	0	0	0	0	0	0	0	0	0	0	0	0	0
13S1	2	SKP Ambohitromby	2002-11-19	1	0	10	37.2	1	0	0	0	1	1	2	25	0	0	0	0	0	0	0	0	0	0	0	0	1	600	0	0	1
14S1	2	SKP Ambohitromby	2002-11-19	1	0	8	36.3	0	0	0	0	0	0	0	21	0	0	0	0	0	0	0	0	0	0	0	0	0	0	0	0	0
15S1	2	SKP Ambohitromby	2002-11-19	1	0	7	36.4	0	0	0	0	0	0	2	20	0	0	0	0	0	0	0	0	0	0	0	0	0	0	0	0	0
16S1	2	SKP Ambohitromby	2002-11-19	1	0	9	36.6	0	0	0	0	0	0	0	20	0	0	0	0	0	0	0	0	0	0	0	0	0	0	0	0	0
17S1	2	SKP Ambohitromby	2002-11-19	1	0	9	38	1	0	0	0	0	0	0	25	0	0	0	0	0	0	0	0	0	0	0	0	0	0	0	0	0
18S1	2	SKP Ambohitromby	2002-11-19	1	0	7	37.1	1	0	0	0	0	0	0	21	0	0	0	0	0	0	0	0	0	0	0	0	0	0	0	0	0
19S1	2	SKP Ambohitromby	2002-11-19	1	0	7	36.2	0	0	0	0	0	0	0	20	0	0	0	0	0	0	0	0	0	0	0	0	0	0	0	0	0
20S1	2	SKP Ambohitromby	2002-11-19	1	0	9	37.6	1	0	0	0	0	0	0	24	0	0	0	0	0	0	0	0	0	0	0	0	0	0	0	0	0
21S1	2	SKP Ambohitromby	2002-11-19	1	0	10	36.6	0	0	0	0	0	0	2	22	1	440	0	0	0	0	0	0	0	0	0	0	0	0	0	0	1
22S1	2	SKP Ambohitromby	2002-11-19	1	0	10	36.6	0	0	0	0	0	0	0	27	0	0	0	0	0	0	0	0	0	0	0	0	0	0	0	0	0
23S1	2	SKP Ambohitromby	2002-11-19	1	0	11	36.6	0	0	0	0	0	0	0	24	0	0	0	0	0	0	0	0	0	0	0	0	0	0	0	0	0
24S1	2	SKP Ambohitromby	2002-11-19	1	0	12	36.6	0	0	0	0	0	0	0	24	0	0	0	0	0	0	0	0	0	0	0	0	0	0	0	0	0
25S1	2	SKP Ambohitromby	2002-11-19	1	0	11	36.5	0	0	0	0	0	0	0	27	0	0	0	0	0	0	0	0	0	0	0	0	0	0	0	0	0
26S1	2	SKP Ambohitromby	2002-11-19	1	0	11	36.2	0	0	0	0	0	0	0	26	1	480	0	0	0	0	0	0	0	0	0	0	0	0	0	0	1
27S1	2	SKP Ambohitromby	2002-11-19	1	0	12	36.2	0	0	0	0	0	0	0	28	0	0	0	0	0	0	0	0	0	0	0	0	0	0	0	0	0
28S1	2	SKP Ambohitromby	2002-11-19	1	0	12	36.4	0	0	0	0	0	0	0	26	0	0	0	0	0	0	0	0	0	0	0	0	0	0	0	0	0
29S1	2	SKP Ambohitromby	2002-11-19	1	0	12	36.2	0	0	0	0	0	0	0	28	0	0	0	0	0	0	0	0	0	0	0	0	0	0	0	0	0
30S1	2	SKP Ambohitromby	2002-11-19	1	0	10	36.2	0	0	0	0	0	0	0	25	0	0	0	0	0	0	0	0	0	0	0	0	0	0	0	0	0
31S1	2	SKP Ambohitromby	2002-11-19	1	1	8	36.2	0	0	0	0	0	0	0	17	0	0	0	0	0	0	0	0	0	0	0	0	0	0	0	0	0
32S1	2	SKP Ambohitromby	2002-11-19	1	1	7	35.8	0	0	0	0	0	0	0	17	0	0	0	0	0	0	0	0	0	0	0	0	0	0	0	0	0
33S1	2	SKP Ambohitromby	2002-11-19	1	1	6	35.9	0	0	0	0	0	0	0	18	0	0	0	0	0	0	0	0	0	0	0	0	0	0	0	0	0
34S1	2	SKP Ambohitromby	2002-11-19	1	1	6	36.7	0	0	0	0	0	0	0	17	0	0	0	0	0	0	0	0	0	0	0	0	0	0	0	0	0
35S1	2	SKP Ambohitromby	2002-11-19	1	1	7	37.7	1	0	0	0	0	0	0	21	0	0	0	0	0	0	0	0	0	0	0	0	0	0	0	0	0
36S1	2	SKP Ambohitromby	2002-11-19	1	1	6	36.8	0	0	0	0	0	0	0	20	0	0	0	0	0	0	0	0	0	0	0	0	0	0	0	0	0
37S1	2	SKP Ambohitromby	2002-11-19	1	1	6	36.6	0	0	0	0	0	0	0	18	0	0	0	0	0	0	0	0	0	0	0	0	0	0	0	0	0
38S1	2	SKP Ambohitromby	2002-11-19	1	1	9	35.9	0	0	0	0	0	0	0	20	0	0	0	0	0	0	0	0	0	0	0	0	0	0	0	0	0
39S1	2	SKP Ambohitromby	2002-11-19	1	1	9	36.4	0	0	0	0	0	0	0	20	0	0	0	0	0	0	0	0	0	0	0	0	0	0	0	0	0
40S1	2	SKP Ambohitromby	2002-11-19	1	0	7	36.2	0	0	0	0	0	0	0	21	0	0	0	0	0	0	0	0	0	0	0	0	0	0	0	0	0
41S1	2	SKP Ambohitromby	2002-11-19	1	0	11	35.9	0	0	0	0	0	0	0	23	0	0	0	0	0	0	0	0	0	0	0	0	0	0	0	0	0
42S1	2	SKP Ambohitromby	2002-11-19	1	1	11	35.9	0	0	0	0	0	0	0	24	0	0	0	0	0	0	0	0	0	0	0	0	0	0	0	0	0
43S1	2	SKP Ambohitromby	2002-11-19	1	1	11	36.3	0	0	0	0	0	0	0	24	0	0	0	0	0	0	0	0	0	0	0	0	0	0	0	0	0
44S1	2	SKP Ambohitromby	2002-11-19	1	1	11	36.2	0	0	0	0	0	0	0	23	0	0	0	0	0	0	0	0	0	0	0	0	0	0	0	0	0
45S1	2	SKP Ambohitromby	2002-11-19	1	1	11	37.6	1	1	0	0	0	1	0	27	1	800	1	16	0	0	0	0	0	0	0	0	0	0	0	0	1
46S1	2	Ste Therese Ambohitromby	2002-11-19	1	1	6	36.2	0	0	0	0	0	0	0	19	0	0	0	0	0	0	0	0	0	0	0	0	0	0	0	0	0
47S1	2	Ste Therese Ambohitromby	2002-11-19	1	1	6	35.9	0	0	0	0	0	0	0	17	0	0	0	0	0	0	0	0	0	0	0	0	0	0	0	0	0
48S1	2	Ste Therese Ambohitromby	2002-11-19	1	1	6	36.6	0	0	0	0	0	0	0	18	0	0	0	0	0	0	0	0	0	0	0	0	0	0	0	0	0
49S1	2	Ste Therese Ambohitromby	2002-11-19	1	0	9	36.2	0	0	0	0	0	0	0	18	0	0	0	0	0	0	0	0	0	0	0	0	0	0	0	0	0
50S1	2	Ste Therese Ambohitromby	2002-11-19	1	0	8	36.3	0	0	0	0	0	0	0	24	0	0	0	0	0	0	0	0	0	0	0	0	0	0	0	0	0
51S1	2	Ste Therese Ambohitromby	2002-11-19	1	0	6	36.2	0	0	0	0	0	0	0	17	0	0	0	0	0	0	0	0	0	0	0	0	0	0	0	0	0
52S1	2	Ste Therese Ambohitromby	2002-11-19	1	0	7	36.4	0	0	0	0	0	0	0	19	0	0	0	0	0	0	0	0	0	0	0	0	0	0	0	0	0
53S1	2	Ste Therese Ambohitromby	2002-11-19	1	1	7	36.8	0	0	0	0	0	0	0	21	0	0	0	0	0	0	0	0	0	0	0	0	0	0	0	0	0
54S1	2	Ste Therese Ambohitromby	2002-11-19	1	1	9	36.2	0	0	0	0	0	0	0	26	0	0	0	0	0	0	0	0	0	0	0	0	0	0	0	0	0
55S1	2	Ste Therese Ambohitromby	2002-11-19	1	1	6	36.4	0	0	0	0	0	0	0	15	0	0	0	0	0	0	0	0	0	0	0	0	0	0	0	0	0
56S1	2	Ste Therese Ambohitromby	2002-11-19	1	1	7	35.9	0	0	0	0	0	0	0	21	0	0	0	0	0	0	0	0	0	0	0	0	0	0	0	0	0
57S1	2	Ste Therese Ambohitromby	2002-11-19	1	1	6	37.3	1	0	0	0	0	0	0	18	0	0	0	0	0	0	0	0	0	0	0	0	0	0	0	0	0
58S1	2	Ste Therese Ambohitromby	2002-11-19	1	0	7	36.4	0	0	0	0	0	0	0	22	0	0	0	0	0	0	0	0	0	0	0	0	0	0	0	0	0
59S1	2	Ste Therese Ambohitromby	2002-11-19	1	0	6	36.6	0	0	0	0	0	0	0	15	1	7400	0	0	0	0	0	0	0	0	0	0	0	0	0	0	1
60S1	2	Ste Therese Ambohitromby	2002-11-19	1	1	7	36.5	0	0	0	0	0	0	0	18	0	0	0	0	0	0	0	0	0	0	0	0	0	0	0	0	0
61S1	2	Ste Therese Ambohitromby	2002-11-19	1	1	6	37.2	1	0	0	0	0	0	0	14	0	0	0	0	0	0	0	0	0	0	0	0	0	0	0	0	0
62S1	2	Ste Therese Ambohitromby	2002-11-19	1	1	10	36.7	0	0	0	0	0	0	0	25	0	0	0	0	0	0	0	0	0	0	0	0	0	0	0	0	0
63S1	2	Ste Therese Ambohitromby	2002-11-19	1	1	9	37	1	0	0	0	0	0	0	19	0	0	0	0	0	0	0	0	0	0	0	0	0	0	0	0	0
64S1	2	Ste Therese Ambohitromby	2002-11-19	1	1	10	36.4	0	0	0	0	0	0	0	25	0	0	0	0	0	0	0	0	0	0	0	0	0	0	0	0	0
65S1	2	Ste Therese Ambohitromby	2002-11-19	1	1	8	37.7	1	0	0	0	0	0	2	24	0	0	0	0	0	0	0	0	0	0	0	0	0	0	0	0	0
66S1	2	Ste Therese Ambohitromby	2002-11-19	1	1	10	36.8	0	0	0	0	0	0	0	23	0	0	0	0	0	0	0	0	0	0	0	0	0	0	0	0	0
67S1	2	Ste Therese Ambohitromby	2002-11-19	1	1	7	36.7	0	0	0	0	0	0	0	26	0	0	0	0	0	0	0	0	0	0	0	0	0	0	0	0	0
68S1	2	Ste Therese Ambohitromby	2002-11-19	1	1	8	36.6	0	0	0	0	0	0	0	22	0	0	0	0	0	0	0	0	0	0	0	0	0	0	0	0	0
69S1	2	Ste Therese Ambohitromby	2002-11-19	1	1	7	36.8	0	0	0	0	0	0	0	21	0	0	0	0	0	0	0	0	0	0	0	0	0	0	0	0	0
70S1	2	Ste Therese Ambohitromby	2002-11-19	1	0	7	36.8	0	0	0	0	0	0	0	19	0	0	0	0	0	0	0	0	0	0	0	0	0	0	0	0	0
71S1	2	Ste Therese Ambohitromby	2002-11-19	1	0	7	36.9	0	0	0	0	0	0	0	16	0	0	0	0	0	0	0	0	0	0	0	0	0	0	0	0	0
72S1	2	Ste Therese Ambohitromby	2002-11-19	1	0	8	36.2	0	0	0	0	0	0	2	20	0	0	0	0	0	0	0	0	0	0	0	0	0	0	0	0	0
73S1	2	Ste Therese Ambohitromby	2002-11-19	1	0	7	35.6	0	0	0	0	0	0	0	21	0	0	0	0	0	0	0	0	0	0	0	0	0	0	0	0	0
74S1	2	Ste Therese Ambohitromby	2002-11-19	1	0	7	36.2	0	0	0	0	0	0	0	18	0	0	0	0	0	0	0	0	0	0	0	0	0	0	0	0	0
75S1	2	Ste Therese Ambohitromby	2002-11-19	1	0	9	36.8	0	0	0	0	0	0	2	23	0	0	0	0	0	0	0	0	0	0	0	0	0	0	0	0	0
76S1	2	Ste Therese Ambohitromby	2002-11-19	1	0	7	37.5	1	0	0	0	0	0	0	17	0	0	0	0	0	0	0	0	0	0	0	0	0	0	0	0	0
76bisS1	2	Ste Therese Ambohitromby	2002-11-19	1	1	8	36.4	0	0	0	0	0	0	0	20	0	0	0	0	0	0	0	0	0	0	0	0	0	0	0	0	0
77S1	2	Ste Therese Ambohitromby	2002-11-19	1	1	7	36.8	0	0	0	0	0	0	0	20	0	0	0	0	0	0	0	0	0	0	0	0	0	0	0	0	0
78S1	2	Ste Therese Ambohitromby	2002-11-19	1	1	9	36.6	0	0	0	0	0	0	0	22	0	0	0	0	0	0	0	0	0	0	0	0	0	0	0	0	0
79S1	2	Ste Therese Ambohitromby	2002-11-19	1	1	9	37.2	1	0	0	0	0	0	0	24	0	0	0	0	0	0	0	0	0	0	0	0	0	0	0	0	0
80S1	2	Ste Therese Ambohitromby	2002-11-19	1	1	10	36.6	0	0	0	0	0	0	2	23	0	0	0	0	0	0	0	0	0	0	0	0	0	0	0	0	0
81S1	2	Ste Therese Ambohitromby	2002-11-19	1	1	8	36.8	0	0	0	0	0	0	0	21	0	0	0	0	0	0	0	0	0	0	0	0	0	0	0	0	0
82S1	2	Ste Therese Ambohitromby	2002-11-19	1	1	8	36.8	0	0	0	0	0	0	0	22	0	0	0	0	0	0	0	0	0	0	0	0	0	0	0	0	0
83S1	2	Ste Therese Ambohitromby	2002-11-19	1	1	10	36.2	0	0	0	0	0	0	0	25	0	0	0	0	0	0	0	0	0	0	0	0	0	0	0	0	0
84S1	2	Ste Therese Ambohitromby	2002-11-19	1	1	8	37	1	0	0	0	0	0	0	24	0	0	0	0	0	0	0	0	0	0	0	0	0	0	0	0	0
85S1	2	Ste Therese Ambohitromby	2002-11-19	1	1	9	37	1	0	0	0	0	0	0	24	0	0	0	0	0	0	0	0	0	0	0	0	0	0	0	0	0
86S1	2	Ste Therese Ambohitromby	2002-11-19	1	1	8	36.8	0	0	0	0	0	0	0	24	0	0	0	0	0	0	0	0	0	0	0	0	0	0	0	0	0
87S1	2	Ste Therese Ambohitromby	2002-11-19	1	1	8	36.7	0	0	0	0	0	0	0	20	0	0	0	0	0	0	0	0	0	0	0	0	0	0	0	0	0
88S1	2	Ste Therese Ambohitromby	2002-11-19	1	1	8	37.1	1	0	0	0	0	0	0	25	0	0	0	0	0	0	0	0	0	0	0	0	0	0	0	0	0
89S1	2	Ste Therese Ambohitromby	2002-11-19	1	1	8	37.3	1	0	0	0	0	0	0	23	0	0	0	0	0	0	0	0	0	0	0	0	0	0	0	0	0
90S1	2	Ste Therese Ambohitromby	2002-11-19	1	1	12	37.1	1	0	0	0	0	0	0	26	0	0	0	0	0	0	0	0	0	0	0	0	0	0	0	0	0
91S1	2	Ste Therese Ambohitromby	2002-11-19	1	1	10	36.2	0	0	0	0	0	0	0	27	0	0	0	0	0	0	0	0	0	0	0	0	0	0	0	0	0
92S1	2	Ste Therese Ambohitromby	2002-11-19	1	0	9	36.7	0	0	0	0	0	0	0	22	1	1080	0	0	0	0	0	0	0	0	0	0	0	0	0	0	1
93S1	2	Ste Therese Ambohitromby	2002-11-19	1	0	10	36.7	0	0	0	0	0	0	0	28	0	0	0	0	0	0	0	0	0	0	0	0	0	0	0	0	0
94S1	2	Ste Therese Ambohitromby	2002-11-19	1	1	10	36.2	0	0	0	0	0	0	0	23	0	0	0	0	0	0	0	0	0	0	0	0	0	0	0	0	0
95S1	2	Ste Therese Ambohitromby	2002-11-19	1	1	10	36.7	0	0	0	0	0	0	0	28	0	0	0	0	0	0	0	0	0	0	0	0	0	0	0	0	0
96S1	2	Ste Therese Ambohitromby	2002-11-19	1	1	12	37.2	1	0	0	0	0	0	0	28	0	0	0	0	0	0	0	0	0	0	0	0	0	0	0	0	0
97S1	2	Ste Therese Ambohitromby	2002-11-19	1	1	10	36.7	0	0	0	0	0	0	0	27	0	0	0	0	0	0	0	0	0	0	0	0	0	0	0	0	0
98S1	2	Ste Therese Ambohitromby	2002-11-19	1	0	11	36.4	0	0	0	0	0	0	0	32	1	688	0	0	0	0	0	0	0	0	0	0	0	0	0	0	1
99S1	2	Ste Therese Ambohitromby	2002-11-19	1	0	10	38.2	1	0	0	0	0	0	0	33	0	0	0	0	0	0	0	0	0	0	0	0	0	0	0	0	0
100S1	2	Ste Therese Ambohitromby	2002-11-19	1	0	10	36.6	0	0	0	0	0	0	0	24	0	0	0	0	0	0	0	0	0	0	0	0	0	0	0	0	0
101S1	2	Ste Therese Ambohitromby	2002-11-19	1	0	10	37.2	1	0	0	0	0	0	0	24	0	0	0	0	0	0	0	0	0	0	0	0	0	0	0	0	0
102S1	2	Ste Therese Ambohitromby	2002-11-19	1	1	12	37.2	1	0	0	0	0	0	0	24	0	0	0	0	0	0	0	0	0	0	0	0	0	0	0	0	0
103S1	2	Ste Therese Ambohitromby	2002-11-19	1	1	10	37.1	1	0	0	0	0	0	0	23	0	0	0	0	0	0	0	0	0	0	0	0	0	0	0	0	0
104S1	2	Ste Therese Ambohitromby	2002-11-19	1	0	9	37.9	1	0	0	0	0	0	0	22	0	0	0	0	0	0	0	0	0	0	0	0	0	0	0	0	0
105S1	2	Ste Therese Ambohitromby	2002-11-19	1	0	9	36.9	0	0	0	0	0	0	0	19	0	0	0	0	0	0	0	0	0	0	0	0	0	0	0	0	0
106S1	2	Ste Therese Ambohitromby	2002-11-19	1	0	12	37	1	0	0	0	0	0	0	31	0	0	0	0	0	0	0	0	0	0	0	0	0	0	0	0	0
107S1	2	Ste Therese Ambohitromby	2002-11-19	1	0	12	36	0	0	0	0	0	0	0	24	0	0	0	0	0	0	0	0	0	0	0	0	0	0	0	0	0
108S1	2	EPP Soamihary	2002-11-19	1	0	8	37	1	0	0	0	0	0	0	19	0	0	0	0	0	0	0	0	0	0	0	0	0	0	0	0	0
109S1	2	EPP Soamihary	2002-11-19	1	0	6	36.9	0	0	0	0	0	0	0	14	0	0	0	0	0	0	0	0	0	0	0	0	0	0	0	0	0
110S1	2	EPP Soamihary	2002-11-19	1	0	6	36.8	0	0	0	0	0	0	0	19	0	0	0	0	0	0	0	0	0	0	0	0	0	0	0	0	0
111S1	2	EPP Soamihary	2002-11-19	1	0	7	37.2	1	1	1	0	0	1	0	20	1	3040	0	0	1	3040	0	0	0	0	0	0	0	0	0	0	1
112S1	2	EPP Soamihary	2002-11-19	1	0	6	37.6	1	1	0	0	0	1	0	17	1	1880	1	16	0	0	0	0	0	0	0	0	0	0	0	0	1
113S1	2	EPP Soamihary	2002-11-19	1	0	6	37.8	1	0	0	0	0	0	0	17	0	0	0	0	0	0	0	0	0	0	0	0	0	0	0	0	0
114S1	2	EPP Soamihary	2002-11-19	1	0	6	37.2	1	0	0	0	0	0	0	13	0	0	0	0	0	0	0	0	0	0	0	0	0	0	0	0	0
115S1	2	EPP Soamihary	2002-11-19	1	0	6	37.4	1	0	0	0	0	0	2	14	0	0	0	0	0	0	0	0	0	0	0	0	0	0	0	0	0
116S1	2	EPP Soamihary	2002-11-19	1	0	6	37.2	1	0	0	0	0	0	0	17	0	0	0	0	0	0	0	0	0	0	0	0	0	0	0	0	0
117S1	2	EPP Soamihary	2002-11-19	1	0	7	37.7	1	1	0	0	0	1	0	16	1	240	1	15.59	0	0	0	0	0	0	0	0	0	0	0	0	1
118S1	2	EPP Soamihary	2002-11-19	1	1	6	37.3	1	0	0	0	0	0	0	17	0	0	0	0	0	0	0	0	0	0	0	0	0	0	0	0	0
119S1	2	EPP Soamihary	2002-11-19	1	1	6	37	1	0	0	0	0	0	0	19	0	0	0	0	0	0	0	0	0	0	0	0	0	0	0	0	0
120S1	2	EPP Soamihary	2002-11-19	1	1	8	36.9	0	0	0	0	0	0	0	21	0	0	0	0	0	0	0	0	0	0	0	0	0	0	0	0	0
121S1	2	EPP Soamihary	2002-11-19	1	1	6	36.4	0	0	0	0	0	0	0	15	0	0	0	0	0	0	0	0	0	0	0	0	0	0	0	0	0
122S1	2	EPP Soamihary	2002-11-19	1	1	6	36.6	0	0	0	0	0	0	0	17	0	0	0	0	0	0	0	0	0	0	0	0	0	0	0	0	0
123S1	2	EPP Soamihary	2002-11-19	1	1	6	37.9	1	0	0	0	0	0	0	18	0	0	0	0	0	0	0	0	0	0	0	0	0	0	0	0	0
124S1	2	EPP Soamihary	2002-11-19	1	1	6	37.4	1	0	0	0	0	0	0	16	0	0	0	0	0	0	0	0	0	0	0	0	0	0	0	0	0
125S1	2	EPP Soamihary	2002-11-19	1	1	6	37.2	1	0	0	0	0	0	0	19	0	0	0	0	0	0	0	0	0	0	0	0	0	0	0	0	0
126S1	2	EPP Soamihary	2002-11-19	1	1	6	37.2	1	0	0	0	0	0	0	18	0	0	0	0	0	0	0	0	0	0	0	0	0	0	0	0	0
127S1	2	EPP Soamihary	2002-11-19	1	1	6	37.1	1	0	0	0	0	0	0	18	0	0	0	0	0	0	0	0	0	0	0	0	0	0	0	0	0
128S1	2	EPP Soamihary	2002-11-19	1	1	8	36.8	0	0	0	0	0	0	0	23	1	4920	0	0	0	0	0	0	0	0	0	0	0	0	0	0	1
129S1	2	EPP Soamihary	2002-11-19	1	0	8	36.1	0	0	0	0	0	0	2	21	1	840	0	0	0	0	0	0	0	0	0	0	0	0	0	0	1
130S1	2	EPP Soamihary	2002-11-19	1	0	6	37.5	1	0	0	0	0	0	0	16	0	0	0	0	0	0	0	0	0	0	0	0	0	0	0	0	0
131S1	2	EPP Soamihary	2002-11-19	1	0	6	37.9	1	0	0	0	0	0	0	15	0	0	0	0	0	0	0	0	0	0	0	0	0	0	0	0	0
132S1	2	EPP Soamihary	2002-11-19	1	0	9	37.2	1	0	0	0	0	0	0	34	0	0	0	0	0	0	0	0	0	0	0	0	0	0	0	0	0
133S1	2	EPP Soamihary	2002-11-19	1	1	7	37.2	1	0	0	0	0	0	0	17	0	0	0	0	0	0	0	0	0	0	0	0	0	0	0	0	0
134S1	2	EPP Soamihary	2002-11-19	1	1	6	36.8	0	0	0	0	0	0	0	19	1	280	1	16	0	0	0	0	0	0	0	0	0	0	0	0	1
135S1	2	EPP Soamihary	2002-11-19	1	1	6	37.6	1	0	0	0	0	0	2	17	0	0	0	0	0	0	0	0	0	0	0	0	0	0	0	0	0
136S1	2	EPP Soamihary	2002-11-19	1	1	7	37.3	1	0	0	0	0	0	0	18	0	0	0	0	0	0	0	0	0	0	0	0	0	0	0	0	0
137S1	2	EPP Soamihary	2002-11-19	1	0	8	37.1	1	0	0	0	0	0	0	17	0	0	0	0	0	0	0	0	0	0	0	0	0	0	0	0	0
138S1	2	EPP Soamihary	2002-11-19	1	0	6	37.2	1	0	0	0	0	0	0	18	0	0	0	0	0	0	0	0	0	0	0	0	0	0	0	0	0
139S1	2	EPP Soamihary	2002-11-19	1	0	7	37.3	1	0	0	0	0	0	0	16	0	0	0	0	0	0	0	0	0	0	0	0	0	0	0	0	0
140S1	2	EPP Soamihary	2002-11-19	1	0	6	36.7	0	0	0	0	0	0	0	17	0	0	0	0	0	0	0	0	0	0	0	0	0	0	0	0	0
141S1	2	EPP Soamihary	2002-11-19	1	0	12	36.8	0	0	0	0	0	0	0	25	0	0	0	0	0	0	0	0	0	0	0	0	0	0	0	0	0
142S1	2	EPP Soamihary	2002-11-19	1	0	8	37.4	1	0	0	0	0	0	0	16	0	0	0	0	0	0	0	0	0	0	0	0	0	0	0	0	0
143S1	2	EPP Soamihary	2002-11-19	1	0	6	36.7	0	0	0	0	0	0	0	16	0	0	0	0	0	0	0	0	0	0	0	0	0	0	0	0	0
144S1	2	EPP Soamihary	2002-11-19	1	0	10	37.6	1	0	0	0	0	0	0	18	0	0	0	0	0	0	0	0	0	0	0	0	0	0	0	0	0
145S1	2	EPP Soamihary	2002-11-19	1	0	10	37.5	1	0	0	0	0	0	0	16	0	0	0	0	0	0	0	0	0	0	0	0	0	0	0	0	0
146S1	2	EPP Soamihary	2002-11-19	1	0	7	37.2	1	0	0	0	0	0	0	18	0	0	0	0	0	0	0	0	0	0	0	0	0	0	0	0	0
147S1	2	EPP Soamihary	2002-11-19	1	0	8	37.6	1	0	0	0	0	0	0	19	0	0	0	0	0	0	0	0	0	0	0	0	0	0	0	0	0
148S1	2	EPP Soamihary	2002-11-19	1	1	9	36.4	0	0	0	0	0	0	0	18	1	120	1	16	0	0	0	0	0	0	0	0	0	0	0	0	1
149S1	2	EPP Soamihary	2002-11-19	1	1	7	36.2	0	0	0	0	0	0	0	17	0	0	0	0	0	0	0	0	0	0	0	0	0	0	0	0	0
150S1	2	EPP Soamihary	2002-11-19	1	1	7	36.4	0	0	0	0	0	0	2	19	0	0	0	0	0	0	0	0	0	0	0	0	0	0	0	0	0
151S1	2	EPP Soamihary	2002-11-19	1	1	8	37.3	1	0	0	0	0	0	0	16	0	0	0	0	0	0	0	0	0	0	0	0	0	0	0	0	0
152S1	2	EPP Soamihary	2002-11-19	1	1	8	37	1	0	0	0	0	0	0	19	0	0	0	0	0	0	0	0	0	0	0	0	0	0	0	0	0
153S1	2	EPP Soamihary	2002-11-19	1	1	7	37	1	0	0	0	0	0	0	19	0	0	0	0	0	0	0	0	0	0	0	0	0	0	0	0	0
154S1	2	EPP Soamihary	2002-11-19	1	1	10	36.2	0	0	0	0	0	0	0	22	0	0	0	0	0	0	0	0	0	0	0	0	0	0	0	0	0
155S1	2	EPP Soamihary	2002-11-19	1	1	10	36.8	0	0	0	0	0	0	0	19	0	0	0	0	0	0	0	0	0	0	0	0	0	0	0	0	0
156S1	2	EPP Soamihary	2002-11-19	1	1	8	37.5	1	0	0	0	0	0	0	19	0	0	0	0	0	0	0	0	0	0	0	0	0	0	0	0	0
157S1	2	EPP Soamihary	2002-11-19	1	1	7	37.2	1	0	0	0	0	0	0	19	0	0	0	0	0	0	0	0	0	0	0	0	0	0	0	0	0
158S1	2	EPP Soamihary	2002-11-19	1	1	11	37.5	1	0	0	0	0	0	0	18	0	0	0	0	0	0	0	0	0	0	0	0	0	0	0	0	0
161S1	2	EPP Soamihary	2002-11-19	1	1	10	37.6	1	0	0	0	0	0	0	20	0	0	0	0	0	0	0	0	0	0	0	0	0	0	0	0	0
162S1	2	EPP Soamihary	2002-11-19	1	1	7	37.5	1	0	0	0	0	0	0	17	0	0	0	0	0	0	0	0	0	0	0	0	0	0	0	0	0
163S1	2	EPP Soamihary	2002-11-19	1	0	9	37.6	1	0	0	0	0	0	0	21	0	0	0	0	0	0	0	0	0	0	0	0	0	0	0	0	0
164S1	2	EPP Soamihary	2002-11-19	1	0	7	37.4	1	0	0	0	0	0	0	16	0	0	0	0	0	0	0	0	0	0	0	0	0	0	0	0	0
165S1	2	EPP Soamihary	2002-11-19	1	0	12	37.3	1	0	0	0	0	0	0	24	0	0	0	0	0	0	0	0	0	0	0	0	0	0	0	0	0
166S1	2	EPP Soamihary	2002-11-19	1	1	8	36.6	0	0	0	0	0	0	0	22	0	0	0	0	0	0	0	0	0	0	0	0	0	0	0	0	0
159S1	2	EPP Soamihary	2002-11-19	1	1	9	36.1	0	0	0	0	0	0	0	20	0	0	0	0	0	0	0	0	0	0	0	0	0	0	0	0	0
160S1	2	EPP Soamihary	2002-11-19	1	1	9	36.9	0	0	0	0	0	0	0	17	0	0	0	0	0	0	0	0	0	0	0	0	0	0	0	0	0
167S1	2	EPP Soamihary	2002-11-19	1	1	9	36.9	0	0	0	0	0	0	0	23	0	0	0	0	0	0	0	0	0	0	0	0	0	0	0	0	0
168S1	2	EPP Soamihary	2002-11-19	1	0	10	36.2	0	0	0	0	0	0	0	23	0	0	0	0	0	0	0	0	0	0	0	0	0	0	0	0	0
169S1	2	EPP Soamihary	2002-11-19	1	0	10	36.6	0	0	0	0	0	0	0	18	0	0	0	0	0	0	0	0	0	0	0	0	0	0	0	0	0
170S1	2	EPP Soamihary	2002-11-19	1	0	9	36.7	0	0	0	0	0	0	0	24	0	0	0	0	0	0	0	0	0	0	0	0	0	0	0	0	0
171S1	2	EPP Soamihary	2002-11-19	1	0	11	36.7	0	0	0	0	0	0	0	29	0	0	0	0	0	0	0	0	0	0	0	0	0	0	0	0	0
172S1	2	EPP Soamihary	2002-11-19	1	0	10	36	0	0	0	0	0	0	0	23	1	1040	0	0	0	0	0	0	0	0	0	0	0	0	0	0	1
173S1	2	EPP Soamihary	2002-11-19	1	0	10	36.9	0	0	0	0	0	0	0	23	0	0	0	0	0	0	0	0	0	0	0	0	0	0	0	0	0
174S1	2	EPP Soamihary	2002-11-19	1	0	11	36.8	0	0	0	0	0	0	0	24	0	0	0	0	0	0	0	0	0	0	0	0	0	0	0	0	0
175S1	2	EPP Soamihary	2002-11-19	1	0	9	36.5	0	0	0	0	0	0	0	23	0	0	0	0	0	0	0	0	0	0	0	0	0	0	0	0	0
176S1	2	EPP Soamihary	2002-11-19	1	0	9	37.8	1	0	0	0	0	0	0	22	0	0	0	0	0	0	0	0	0	0	0	0	0	0	0	0	0
177S1	2	EPP Soamihary	2002-11-19	1	0	9	37.1	1	0	0	0	0	0	0	25	0	0	0	0	0	0	0	0	0	0	0	0	0	0	0	0	0
178S1	2	EPP Soamihary	2002-11-19	1	0	10	36.3	0	0	0	0	0	0	0	22	0	0	0	0	0	0	0	0	0	0	0	0	0	0	0	0	0
179S1	2	EPP Soamihary	2002-11-19	1	0	10	36.4	0	0	0	0	0	0	0	22	0	0	0	0	0	0	0	0	0	0	0	0	0	0	0	0	0
180S1	2	EPP Soamihary	2002-11-19	1	1	11	37.3	1	0	0	0	0	0	0	25	0	0	0	0	0	0	0	0	0	0	0	0	0	0	0	0	0
181S1	2	EPP Soamihary	2002-11-19	1	1	8	36.8	0	0	0	0	0	0	0	23	0	0	0	0	0	0	0	0	0	0	0	0	0	0	0	0	0
182S1	2	EPP Soamihary	2002-11-19	1	1	11	36.7	0	0	0	0	0	0	0	26	0	0	0	0	0	0	0	0	0	0	0	0	0	0	0	0	0
183S1	2	EPP Soamihary	2002-11-19	1	1	10	37.4	1	0	0	0	0	0	0	24	0	0	0	0	0	0	0	0	0	0	0	0	0	0	0	0	0
184S1	2	EPP Soamihary	2002-11-19	1	0	8	37.2	1	0	0	0	0	0	0	23	0	0	0	0	0	0	0	0	0	0	0	0	0	0	0	0	0
185S1	2	EPP Soamihary	2002-11-19	1	1	9	37.1	1	0	0	0	0	0	0	19	0	0	0	0	0	0	0	0	0	0	0	0	0	0	0	0	0
186S1	2	EPP Soamihary	2002-11-19	1	1	10	36.8	0	0	0	0	0	0	0	26	0	0	0	0	0	0	0	0	0	0	0	0	0	0	0	0	0
187S1	2	EPP Soamihary	2002-11-19	1	1	10	36.7	0	0	0	0	0	0	0	24	0	0	0	0	0	0	0	0	0	0	0	0	0	0	0	0	0
188S1	2	EPP Soamihary	2002-11-19	1	1	8	36.3	0	0	0	0	0	0	0	22	1	760	0	0	0	0	0	0	0	0	0	0	0	0	0	0	1
189S1	2	EPP Soamihary	2002-11-19	1	1	11	37.5	1	0	0	0	0	0	0	21	0	0	0	0	0	0	0	0	0	0	0	0	0	0	0	0	0
190S1	2	EPP Soamihary	2002-11-19	1	1	8	36.8	0	0	0	0	0	0	0	21	0	0	0	0	0	0	0	0	0	0	0	0	0	0	0	0	0
191S1	2	EPP Soamihary	2002-11-19	1	0	8	37.2	1	0	0	0	0	0	0	19	0	0	0	0	0	0	0	0	0	0	0	0	0	0	0	0	0
192S1	2	EPP Soamihary	2002-11-19	1	0	8	36.7	0	0	0	0	0	0	0	22	0	0	0	0	0	0	0	0	0	0	0	0	0	0	0	0	0
193S1	2	EPP Soamihary	2002-11-19	1	1	9	37.1	1	0	0	0	0	0	0	24	0	0	0	0	0	0	0	0	0	0	0	0	0	0	0	0	0
194S1	2	EPP Soamihary	2002-11-19	1	0	12	37	1	0	0	0	0	0	0	24	0	0	0	0	0	0	0	0	0	0	0	0	0	0	0	0	0
195S1	2	EPP Soamihary	2002-11-19	1	0	8	37.1	1	0	0	0	0	0	0	17	0	0	0	0	0	0	0	0	0	0	0	0	0	0	0	0	0
196S1	2	EPP Soamihary	2002-11-19	1	1	12	36.8	0	0	0	0	0	0	0	27	0	0	0	0	0	0	0	0	0	0	0	0	0	0	0	0	0
197S1	2	EPP Soamihary	2002-11-19	1	0	8	36.9	0	0	0	0	0	0	0	25	0	0	0	0	0	0	0	0	0	0	0	0	0	0	0	0	0
198S1	2	EPP Soamihary	2002-11-19	1	1	8	37.1	1	0	0	0	0	0	0	23	0	0	0	0	0	0	0	0	0	0	0	0	0	0	0	0	0
199S1	2	EPP Soamihary	2002-11-19	1	0	9	36.9	0	0	0	0	0	0	0	28	0	0	0	0	0	0	0	0	0	0	0	0	0	0	0	0	0
200S1	2	EPP Soamihary	2002-11-19	1	0	9	36.6	0	0	0	0	0	0	0	29	0	0	0	0	0	0	0	0	0	0	0	0	0	0	0	0	0
201S1	2	EPP Soamihary	2002-11-19	1	0	10	37.3	1	0	0	0	0	0	0	20	0	0	0	0	0	0	0	0	0	0	0	0	0	0	0	0	0
202S1	2	EPP Soamihary	2002-11-19	1	0	10	36.6	0	0	0	0	0	0	0	36	0	0	0	0	0	0	0	0	0	0	0	0	0	0	0	0	0
203S1	2	EPP Soamihary	2002-11-19	1	0	10	37.1	1	0	0	0	0	0	0	26	0	0	0	0	0	0	0	0	0	0	0	0	0	0	0	0	0
204S1	2	EPP Soamihary	2002-11-19	1	0	10	37.2	1	0	0	0	0	0	0	27	0	0	0	0	0	0	0	0	0	0	0	0	0	0	0	0	0
205S1	2	EPP Soamihary	2002-11-19	1	0	10	37.2	1	0	0	0	0	0	0	25	0	0	0	0	0	0	0	0	0	0	0	0	0	0	0	0	0
206S1	2	EPP Soamihary	2002-11-19	1	0	10	36.2	0	0	0	0	0	0	0	28	0	0	0	0	0	0	0	0	0	0	0	0	0	0	0	0	0
207S1	2	EPP Soamihary	2002-11-19	1	0	11	37.6	1	0	0	0	0	0	0	26	0	0	0	0	0	0	0	0	0	0	0	0	0	0	0	0	0
209S1	2	EPP Soamihary	2002-11-19	1	0	11	36.8	0	0	0	0	0	0	0	27	0	0	0	0	0	0	0	0	0	0	0	0	0	0	0	0	0
210S1	2	EPP Soamihary	2002-11-19	1	0	12	37.2	1	0	0	0	0	0	0	39	0	0	0	0	0	0	0	0	0	0	0	0	0	0	0	0	0
211S1	2	EPP Soamihary	2002-11-19	1	0	12	36.9	0	0	0	0	0	0	0	34	0	0	0	0	0	0	0	0	0	0	0	0	0	0	0	0	0
212S1	2	EPP Soamihary	2002-11-19	1	0	9	37.6	1	0	0	0	0	0	0	29	0	0	0	0	0	0	0	0	0	0	0	0	0	0	0	0	0
213S1	2	EPP Soamihary	2002-11-19	1	0	12	37.3	1	0	0	0	1	1	0	30	0	0	0	0	0	0	0	0	0	0	0	0	1	1480	0	0	1
214S1	2	EPP Soamihary	2002-11-19	1	1	10	37.3	1	0	0	0	0	0	2	23	0	0	0	0	0	0	0	0	0	0	0	0	0	0	0	0	0
215S1	2	EPP Soamihary	2002-11-19	1	1	10	38	1	0	0	0	0	0	2	28	0	0	0	0	0	0	0	0	0	0	0	0	0	0	0	0	0
216S1	2	EPP Soamihary	2002-11-19	1	1	11	37.2	1	0	0	0	0	0	0	26	0	0	0	0	0	0	0	0	0	0	0	0	0	0	0	0	0
217S1	2	EPP Soamihary	2002-11-19	1	1	11	37.2	1	0	0	0	0	0	0	24	0	0	0	0	0	0	0	0	0	0	0	0	0	0	0	0	0
218S1	2	EPP Soamihary	2002-11-19	1	0	11	37	1	0	0	0	0	0	0	26	0	0	0	0	0	0	0	0	0	0	0	0	0	0	0	0	0
219S1	2	EPP Soamihary	2002-11-19	1	1	11	36.8	0	0	0	0	0	0	0	24	0	0	0	0	0	0	0	0	0	0	0	0	0	0	0	0	0
220S1	2	EPP Soamihary	2002-11-19	1	1	12	36.1	0	0	0	0	0	0	0	25	0	0	0	0	0	0	0	0	0	0	0	0	0	0	0	0	0
221S1	2	EPP Soamihary	2002-11-19	1	1	12	36.4	0	0	0	0	0	0	0	27	0	0	0	0	0	0	0	0	0	0	0	0	0	0	0	0	0
222S1	2	EPP Soamihary	2002-11-19	1	1	12	36.5	0	0	0	0	0	0	0	26	0	0	0	0	0	0	0	0	0	0	0	0	0	0	0	0	0
223S1	2	EPP Soamihary	2002-11-19	1	1	12	37.2	1	0	0	0	0	0	0	27	0	0	0	0	0	0	0	0	0	0	0	0	0	0	0	0	0
224S1	2	EPP Soamihary	2002-11-19	1	1	12	37	1	0	0	0	0	0	0	35	0	0	0	0	0	0	0	0	0	0	0	0	0	0	0	0	0
225S1	2	EPP Soamihary	2002-11-19	1	1	12	36.9	0	0	0	0	0	0	0	24	0	0	0	0	0	0	0	0	0	0	0	0	0	0	0	0	0
226S1	2	EPP Soamihary	2002-11-19	1	1	12	36.3	0	0	0	0	0	0	0	31	0	0	0	0	0	0	0	0	0	0	0	0	0	0	0	0	0
227S1	2	EPP Soamihary	2002-11-19	1	1	12	36.7	0	0	0	0	0	0	0	24	0	0	0	0	0	0	0	0	0	0	0	0	0	0	0	0	0
1S2	2	EPP Andranonahoatra	2003-02-03	2	1	12	36.9	0	0	0	0	0	0	0	24	0	0	0	0	0	0	0	0	0	0	0	0	0	0	0	0	0
2S2	2	EPP Andranonahoatra	2003-02-03	2	0	12	36	0	0	0	0	0	0	0	30	0	0	0	0	0	0	0	0	0	0	0	0	0	0	0	0	0
3S2	2	EPP Andranonahoatra	2003-02-03	2	0	12	36.1	0	0	0	0	0	0	0	35	0	0	0	0	0	0	0	0	0	0	0	0	0	0	0	0	0
4S2	2	EPP Andranonahoatra	2003-02-03	2	1	10	37.1	1	1	0	0	0	1	0	27	1	110.67	0	0	0	0	0	0	0	0	0	0	0	0	0	0	1
5S2	2	EPP Andranonahoatra	2003-02-03	2	1	9	36.6	0	0	0	0	0	0	0	20	0	0	0	0	0	0	0	0	0	0	0	0	0	0	0	0	0
6S2	2	EPP Andranonahoatra	2003-02-03	2	1	7	37.3	1	0	0	0	0	0	0	22	0	0	0	0	0	0	0	0	0	0	0	0	0	0	0	0	0
7S2	2	EPP Andranonahoatra	2003-02-03	2	1	8	37.3	1	0	0	0	0	0	0	20	0	0	0	0	0	0	0	0	0	0	0	0	0	0	0	0	0
8S2	2	EPP Andranonahoatra	2003-02-03	2	1	10	36.8	0	0	0	0	0	0	0	26	0	0	0	0	0	0	0	0	0	0	0	0	0	0	0	0	0
9S2	2	EPP Andranonahoatra	2003-02-03	2	1	9	36.9	0	0	0	0	0	0	0	21	0	0	0	0	0	0	0	0	0	0	0	0	0	0	0	0	0
10S2	2	EPP Andranonahoatra	2003-02-03	2	0	11	37.1	1	0	0	0	0	0	0	26	0	0	0	0	0	0	0	0	0	0	0	0	0	0	0	0	0
11S2	2	EPP Andranonahoatra	2003-02-03	2	0	9	37.5	1	0	0	0	0	0	0	20	0	0	0	0	0	0	0	0	0	0	0	0	0	0	0	0	0
12S2	2	EPP Andranonahoatra	2003-02-03	2	0	7	36.5	0	0	0	0	0	0	0	22	0	0	0	0	0	0	0	0	0	0	0	0	0	0	0	0	0
13S2	2	EPP Andranonahoatra	2003-02-03	2	0	10	37	1	0	0	0	0	0	0	29	0	0	0	0	0	0	0	0	0	0	0	0	0	0	0	0	0
14S2	2	EPP Andranonahoatra	2003-02-03	2	1	10	37.5	1	1	0	0	0	1	2	22	1	17600	0	0	0	0	0	0	0	0	0	0	0	0	0	0	1
15S2	2	EPP Andranonahoatra	2003-02-03	2	0	8	37.5	1	0	0	0	0	0	0	24	0	0	0	0	0	0	0	0	0	0	0	0	0	0	0	0	0
16S2	2	EPP Andranonahoatra	2003-02-03	2	0	7	37.3	1	0	0	0	0	0	0	25	0	0	0	0	0	0	0	0	0	0	0	0	0	0	0	0	0
17S2	2	EPP Andranonahoatra	2003-02-03	2	0	7	37.1	1	1	0	0	0	1	0	20	1	433.49	0	0	0	0	0	0	0	0	0	0	0	0	0	0	1
18S2	2	EPP Andranonahoatra	2003-02-03	2	1	10	36.7	0	0	0	0	0	0	0	25	0	0	0	0	0	0	0	0	0	0	0	0	0	0	0	0	0
19S2	2	EPP Andranonahoatra	2003-02-03	2	1	11	36.8	0	0	0	0	0	0	0	28	0	0	0	0	0	0	0	0	0	0	0	0	0	0	0	0	0
20S2	2	EPP Andranonahoatra	2003-02-03	2	1	12	36.1	0	0	0	0	0	0	0	26	1	9019.6	0	0	0	0	0	0	0	0	0	0	0	0	0	0	1
21S2	2	EPP Andranonahoatra	2003-02-03	2	1	12	36.7	0	0	0	0	0	0	0	32	0	0	0	0	0	0	0	0	0	0	0	0	0	0	0	0	0
22S2	2	EPP Andranonahoatra	2003-02-03	2	1	7	36.5	0	0	0	0	0	0	0	16	0	0	0	0	0	0	0	0	0	0	0	0	0	0	0	0	0
23S2	2	EPP Andranonahoatra	2003-02-03	2	1	9	37.2	1	0	0	0	0	0	0	20	0	0	0	0	0	0	0	0	0	0	0	0	0	0	0	0	0
24S2	2	EPP Andranonahoatra	2003-02-03	2	1	9	36.1	0	0	0	0	0	0	0	18	0	0	0	0	0	0	0	0	0	0	0	0	0	0	0	0	0
25S2	2	EPP Andranonahoatra	2003-02-03	2	1	7	37.2	1	0	0	0	0	0	0	19	0	0	0	0	0	0	0	0	0	0	0	0	0	0	0	0	0
26S2	2	EPP Andranonahoatra	2003-02-03	2	1	7	36.7	0	0	0	0	0	0	3	20	0	0	0	0	0	0	0	0	0	0	0	0	0	0	0	0	0
27S2	2	EPP Andranonahoatra	2003-02-03	2	1	9	36.9	0	0	0	0	0	0	0	22	0	0	0	0	0	0	0	0	0	0	0	0	0	0	0	0	0
28S2	2	EPP Andranonahoatra	2003-02-03	2	1	7	36.9	0	0	0	0	0	0	0	18	0	0	0	0	0	0	0	0	0	0	0	0	0	0	0	0	0
29S2	2	EPP Andranonahoatra	2003-02-03	2	1	9	36.7	0	0	0	0	0	0	2	20	0	0	0	0	0	0	0	0	0	0	0	0	0	0	0	0	0
30S2	2	EPP Andranonahoatra	2003-02-03	2	1	7	37.3	1	0	0	0	0	0	0	15	0	0	0	0	0	0	0	0	0	0	0	0	0	0	0	0	0
31S2	2	EPP Andranonahoatra	2003-02-03	2	0	8	36.7	0	0	0	0	0	0	0	21	0	0	0	0	0	0	0	0	0	0	0	0	0	0	0	0	0
32S2	2	EPP Andranonahoatra	2003-02-03	2	0	9	37.2	1	1	0	0	0	1	0	19	1	392.15	0	0	0	0	0	0	0	0	0	0	0	0	0	0	1
33S2	2	EPP Andranonahoatra	2003-02-03	2	0	10	36.7	0	0	0	0	0	0	0	22	0	0	0	0	0	0	0	0	0	0	0	0	0	0	0	0	0
34S2	2	EPP Andranonahoatra	2003-02-03	2	0	8	36.1	0	0	0	0	0	0	0	20	0	0	0	0	0	0	0	0	0	0	0	0	0	0	0	0	0
35S2	2	EPP Andranonahoatra	2003-02-03	2	0	7	37.1	1	0	0	0	0	0	0	16	0	0	0	0	0	0	0	0	0	0	0	0	0	0	0	0	0
36S2	2	EPP Andranonahoatra	2003-02-03	2	0	7	37.3	1	0	0	0	0	0	0	20	0	0	0	0	0	0	0	0	0	0	0	0	0	0	0	0	0
37S2	2	EPP Andranonahoatra	2003-02-03	2	0	7	37.2	1	0	0	0	0	0	0	15	0	0	0	0	0	0	0	0	0	0	0	0	0	0	0	0	0
38S2	2	EPP Andranonahoatra	2003-02-03	2	0	7	37.3	1	0	0	0	0	0	0	14	0	0	0	0	0	0	0	0	0	0	0	0	0	0	0	0	0
39S2	2	EPP Andranonahoatra	2003-02-03	2	0	8	36.8	0	0	0	0	0	0	0	16	0	0	0	0	0	0	0	0	0	0	0	0	0	0	0	0	0
40S2	2	EPP Andranonahoatra	2003-02-03	2	0	11	37.1	1	1	0	0	0	1	0	24	1	636.81	0	0	0	0	0	0	0	0	0	0	0	0	0	0	1
41S2	2	EPP Andranonahoatra	2003-02-03	2	0	7	36.9	0	0	0	0	0	0	0	21	0	0	0	0	0	0	0	0	0	0	0	0	0	0	0	0	0
42S2	2	EPP Andranonahoatra	2003-02-03	2	1	7	37.3	1	1	0	0	0	1	0	19	1	2400	0	0	0	0	0	0	0	0	0	0	0	0	0	0	1
43S2	2	EPP Andranonahoatra	2003-02-03	2	1	11	38.6	1	1	0	0	0	1	0	26	1	18400	0	0	0	0	0	0	0	0	0	0	0	0	0	0	1
44S2	2	EPP Andranonahoatra	2003-02-03	2	1	10	36.8	0	0	0	0	0	0	0	25	1	64	0	0	0	0	0	0	0	0	0	0	0	0	0	0	1
45S2	2	EPP Andranonahoatra	2003-02-03	2	1	11	36.8	0	0	0	0	0	0	0	26	0	0	0	0	0	0	0	0	0	0	0	0	0	0	0	0	0
46S2	2	EPP Andranonahoatra	2003-02-03	2	1	11	36.1	0	0	0	0	0	0	0	26	0	0	0	0	0	0	0	0	0	0	0	0	0	0	0	0	0
47S2	2	EPP Andranonahoatra	2003-02-03	2	1	11	37	1	0	0	0	0	0	0	25	0	0	0	0	0	0	0	0	0	0	0	0	0	0	0	0	0
48S2	2	EPP Andranonahoatra	2003-02-03	2	0	9	36.6	0	0	0	0	0	0	0	19	0	0	0	0	0	0	0	0	0	0	0	0	0	0	0	0	0
49S2	2	EPP Andranonahoatra	2003-02-03	2	0	8	37.5	1	0	0	0	0	0	0	22	0	0	0	0	0	0	0	0	0	0	0	0	0	0	0	0	0
50S2	2	EPP Andranonahoatra	2003-02-03	2	0	9	36.9	0	0	0	0	0	0	0	17	0	0	0	0	0	0	0	0	0	0	0	0	0	0	0	0	0
51S2	2	EPP Andranonahoatra	2003-02-03	2	0	8	36.8	0	0	0	0	0	0	0	16	0	0	0	0	0	0	0	0	0	0	0	0	0	0	0	0	0
52S2	2	EPP Andranonahoatra	2003-02-03	2	0	8	37.1	1	1	0	0	0	1	0	21	1	461.53	0	0	0	0	0	0	0	0	0	0	0	0	0	0	1
53S2	2	EPP Andranonahoatra	2003-02-03	2	0	9	37	1	0	0	0	0	0	0	15	0	0	0	0	0	0	0	0	0	0	0	0	0	0	0	0	0
54S2	2	EPP Andranonahoatra	2003-02-03	2	0	10	36.2	0	0	0	0	0	0	0	26	0	0	0	0	0	0	0	0	0	0	0	0	0	0	0	0	0
55S2	2	EPP Andranonahoatra	2003-02-03	2	0	9	36.5	0	0	0	0	0	0	0	17	1	1359.22	0	0	0	0	0	0	0	0	0	0	0	0	0	0	1
56S2	2	EPP Andranonahoatra	2003-02-03	2	0	7	36.2	0	0	0	0	0	0	0	18	0	0	0	0	0	0	0	0	0	0	0	0	0	0	0	0	0
57S2	2	EPP Andranonahoatra	2003-02-03	2	0	9	36	0	0	0	0	0	0	0	16	0	0	0	0	0	0	0	0	0	0	0	0	0	0	0	0	0
58S2	2	EPP Andranonahoatra	2003-02-03	2	0	7	36.2	0	0	0	0	0	0	0	15	0	0	0	0	0	0	0	0	0	0	0	0	0	0	0	0	0
59S2	2	EPP Andranonahoatra	2003-02-03	2	0	10	36.3	0	0	0	0	0	0	0	23	0	0	0	0	0	0	0	0	0	0	0	0	0	0	0	0	0
60S2	2	EPP Andranonahoatra	2003-02-03	2	0	12	37.3	1	1	0	0	0	1	0	21	1	128	0	0	0	0	0	0	0	0	0	0	0	0	0	0	1
61S2	2	EPP Andranonahoatra	2003-02-03	2	0	8	36.8	0	0	0	0	0	0	0	17	1	1777.77	0	0	0	0	0	0	0	0	0	0	0	0	0	0	1
62S2	2	EPP Andranonahoatra	2003-02-03	2	0	8	36.9	0	0	0	0	0	0	0	17	0	0	0	0	0	0	0	0	0	0	0	0	0	0	0	0	0
63S2	2	EPP Andranonahoatra	2003-02-03	2	0	7	37.1	1	0	0	0	0	0	0	19	0	0	0	0	0	0	0	0	0	0	0	0	0	0	0	0	0
64S2	2	EPP Andranonahoatra	2003-02-03	2	0	9	37.3	1	0	0	0	0	0	2	20	0	0	0	0	0	0	0	0	0	0	0	0	0	0	0	0	0
65S2	2	EPP Andranonahoatra	2003-02-03	2	0	8	37.1	1	1	0	0	0	1	2	26	1	6880	0	0	0	0	0	0	0	0	0	0	0	0	0	0	1
66S2	2	EPP Andranonahoatra	2003-02-03	2	0	11	37.1	1	0	0	0	0	0	0	20	0	0	0	0	0	0	0	0	0	0	0	0	0	0	0	0	0
67S2	2	EPP Andranonahoatra	2003-02-03	2	0	10	36.4	0	0	0	0	0	0	0	20	0	0	0	0	0	0	0	0	0	0	0	0	0	0	0	0	0
68S2	2	EPP Andranonahoatra	2003-02-03	2	0	7	36.6	0	0	0	0	0	0	0	17	0	0	0	0	0	0	0	0	0	0	0	0	0	0	0	0	0
69S2	2	EPP Andranonahoatra	2003-02-03	2	0	7	36.6	0	0	0	0	0	0	0	18	0	0	0	0	0	0	0	0	0	0	0	0	0	0	0	0	0
70S2	2	EPP Andranonahoatra	2003-02-03	2	0	8	36.9	0	0	0	0	0	0	0	19	1	80	0	0	0	0	0	0	0	0	0	0	0	0	0	0	1
71S2	2	EPP Andranonahoatra	2003-02-03	2	0	8	36.6	0	0	0	0	0	0	0	17	0	0	0	0	0	0	0	0	0	0	0	0	0	0	0	0	0
72S2	2	EPP Andranonahoatra	2003-02-03	2	1	8	37	1	0	0	0	0	0	0	22	0	0	0	0	0	0	0	0	0	0	0	0	0	0	0	0	0
73S2	2	EPP Andranonahoatra	2003-02-03	2	1	8	36.6	0	0	0	0	0	0	0	24	1	110.67	0	0	0	0	0	0	0	0	0	0	0	0	0	0	1
74S2	2	EPP Andranonahoatra	2003-02-03	2	1	8	36.1	0	0	0	0	0	0	0	24	0	0	0	0	0	0	0	0	0	0	0	0	0	0	0	0	0
75S2	2	EPP Andranonahoatra	2003-02-03	2	1	9	37.2	1	0	0	0	0	0	0	17	0	0	0	0	0	0	0	0	0	0	0	0	0	0	0	0	0
76S2	2	EPP Andranonahoatra	2003-02-03	2	1	7	37.2	1	0	0	0	0	0	0	19	0	0	0	0	0	0	0	0	0	0	0	0	0	0	0	0	0
77S2	2	EPP Andranonahoatra	2003-02-03	2	1	11	37.4	1	0	0	0	0	0	0	25	0	0	0	0	0	0	0	0	0	0	0	0	0	0	0	0	0
78S2	2	EPP Andranonahoatra	2003-02-03	2	1	12	36.8	0	0	0	0	0	0	0	27	0	0	0	0	0	0	0	0	0	0	0	0	0	0	0	0	0
79S2	2	EPP Andranonahoatra	2003-02-03	2	1	12	37.1	1	0	0	0	0	0	0	30	0	0	0	0	0	0	0	0	0	0	0	0	0	0	0	0	0
80S2	2	EPP Andranonahoatra	2003-02-03	2	0	10	36.6	0	0	0	0	0	0	0	22	0	0	0	0	0	0	0	0	0	0	0	0	0	0	0	0	0
81S2	2	EPP Andranonahoatra	2003-02-03	2	0	12	37	1	0	0	0	0	0	0	32	0	0	0	0	0	0	0	0	0	0	0	0	0	0	0	0	0
82S2	2	EPP Andranonahoatra	2003-02-03	2	0	11	36.3	0	0	0	0	0	0	0	30	0	0	0	0	0	0	0	0	0	0	0	0	0	0	0	0	0
83S2	2	EPP Andranonahoatra	2003-02-03	2	0	12	37.1	1	0	0	0	0	0	0	23	0	0	0	0	0	0	0	0	0	0	0	0	0	0	0	0	0
84S2	2	EPP Andranonahoatra	2003-02-03	2	0	11	36.8	0	0	0	0	0	0	0	19	0	0	0	0	0	0	0	0	0	0	0	0	0	0	0	0	0
85S2	2	EPP Andranonahoatra	2003-02-03	2	0	12	36.8	0	0	0	0	0	0	0	29	0	0	0	0	0	0	0	0	0	0	0	0	0	0	0	0	0
86S2	2	EPP Andranonahoatra	2003-02-03	2	0	11	36.1	0	0	0	0	0	0	0	25	0	0	0	0	0	0	0	0	0	0	0	0	0	0	0	0	0
87S2	2	EPP Andranonahoatra	2003-02-03	2	0	12	36.6	0	0	0	0	0	0	0	24	0	0	0	0	0	0	0	0	0	0	0	0	0	0	0	0	0
88S2	2	EPP Andranonahoatra	2003-02-03	2	0	12	37.1	1	0	0	0	0	0	0	31	0	0	0	0	0	0	0	0	0	0	0	0	0	0	0	0	0
89S2	2	EPP Andranonahoatra	2003-02-03	2	0	12	37	1	0	0	0	0	0	0	31	0	0	0	0	0	0	0	0	0	0	0	0	0	0	0	0	0
90S2	2	EPP Andranonahoatra	2003-02-03	2	0	10	37.3	1	0	0	0	0	0	0	20	0	0	0	0	0	0	0	0	0	0	0	0	0	0	0	0	0
91S2	2	EPP Andranonahoatra	2003-02-03	2	0	11	36.2	0	0	0	0	0	0	0	30	0	0	0	0	0	0	0	0	0	0	0	0	0	0	0	0	0
92S2	2	EPP Andranonahoatra	2003-02-03	2	0	10	36.9	0	0	0	0	0	0	0	29	0	0	0	0	0	0	0	0	0	0	0	0	0	0	0	0	0
93S2	2	EPP Andranonahoatra	2003-02-03	2	0	10	37.2	1	0	0	0	0	0	0	27	0	0	0	0	0	0	0	0	0	0	0	0	0	0	0	0	0
94S2	2	EPP Andranonahoatra	2003-02-03	2	0	10	36.1	0	0	0	0	0	0	0	25	0	0	0	0	0	0	0	0	0	0	0	0	0	0	0	0	0
95S2	2	EPP Andranonahoatra	2003-02-03	2	0	9	36.4	0	0	0	0	0	0	0	18	0	0	0	0	0	0	0	0	0	0	0	0	0	0	0	0	0
96S2	2	EPP Andranonahoatra	2003-02-03	2	0	9	36.1	0	0	0	0	0	0	0	20	0	0	0	0	0	0	0	0	0	0	0	0	0	0	0	0	0
97S2	2	EPP Andranonahoatra	2003-02-03	2	1	9	37.2	1	0	0	0	0	0	0	20	0	0	0	0	0	0	0	0	0	0	0	0	0	0	0	0	0
98S2	2	EPP Andranonahoatra	2003-02-03	2	0	10	36.6	0	0	0	0	0	0	0	21	0	0	0	0	0	0	0	0	0	0	0	0	0	0	0	0	0
99S2	2	EPP Andranonahoatra	2003-02-03	2	1	8	36.7	0	0	0	0	0	0	0	24	0	0	0	0	0	0	0	0	0	0	0	0	0	0	0	0	0
100S2	2	EPP Andranonahoatra	2003-02-03	2	1	12	36.7	0	0	0	0	0	0	2	24	0	0	0	0	0	0	0	0	0	0	0	0	0	0	0	0	0
101S2	2	EPP Soamihary	2003-02-03	2	0	7	36.7	0	0	0	0	0	0	0	17	0	0	0	0	0	0	0	0	0	0	0	0	0	0	0	0	0
102S2	2	EPP Soamihary	2003-02-03	2	0	7	36.4	0	0	0	0	0	0	0	18	0	0	0	0	0	0	0	0	0	0	0	0	0	0	0	0	0
103S2	2	EPP Soamihary	2003-02-03	2	0	7	36.9	0	0	0	0	0	0	0	18	0	0	0	0	0	0	0	0	0	0	0	0	0	0	0	0	0
104S2	2	EPP Soamihary	2003-02-03	2	0	7	36.3	0	0	0	0	0	0	2	17	1	1203.88	1	47.9	0	0	0	0	0	0	0	0	0	0	0	0	1
105S2	2	EPP Soamihary	2003-02-03	2	0	7	37.3	1	0	0	0	0	0	0	17	0	0	0	0	0	0	0	0	0	0	0	0	0	0	0	0	0
106S2	2	EPP Soamihary	2003-02-03	2	0	7	36.7	0	0	0	0	0	0	0	19	0	0	0	0	0	0	0	0	0	0	0	0	0	0	0	0	0
107S2	2	EPP Soamihary	2003-02-03	2	0	7	36.9	0	0	0	0	0	0	0	16	1	46.96	0	0	0	0	0	0	0	0	0	0	0	0	0	0	1
108S2	2	EPP Soamihary	2003-02-03	2	0	7	36.4	0	0	0	0	0	0	0	21	0	0	0	0	0	0	0	0	0	0	0	0	0	0	0	0	0
109S2	2	EPP Soamihary	2003-02-03	2	1	7	36.6	0	0	0	0	0	0	0	17	0	0	0	0	0	0	0	0	0	0	0	0	0	0	0	0	0
110S2	2	EPP Soamihary	2003-02-03	2	1	7	36.7	0	0	0	0	0	0	0	19	0	0	0	0	0	0	0	0	0	0	0	0	0	0	0	0	0
111S2	2	EPP Soamihary	2003-02-03	2	1	7	36.5	0	0	0	0	0	0	0	16	1	4431.37	0	0	0	0	0	0	0	0	0	0	0	0	0	0	1
112S2	2	EPP Soamihary	2003-02-03	2	1	8	37.4	1	0	0	0	0	0	0	20	0	0	0	0	0	0	0	0	0	0	0	0	0	0	0	0	0
113S2	2	EPP Soamihary	2003-02-03	2	1	7	36.7	0	0	0	0	0	0	0	20	0	0	0	0	0	0	0	0	0	0	0	0	0	0	0	0	0
114S2	2	EPP Soamihary	2003-02-03	2	1	7	36.7	0	0	0	0	0	0	0	19	0	0	0	0	0	0	0	0	0	0	0	0	0	0	0	0	0
115S2	2	EPP Soamihary	2003-02-03	2	1	8	37.2	1	1	0	0	0	1	0	18	1	49353.23	0	0	0	0	0	0	0	0	0	0	0	0	0	0	1
116S2	2	EPP Soamihary	2003-02-03	2	1	10	36.5	0	0	0	0	0	0	0	21	0	0	0	0	0	0	0	0	0	0	0	0	0	0	0	0	0
117S2	2	EPP Soamihary	2003-02-03	2	1	8	37.1	1	0	0	0	0	0	0	19	0	0	0	0	0	0	0	0	0	0	0	0	0	0	0	0	0
118S2	2	EPP Soamihary	2003-02-03	2	1	8	36.3	0	0	0	0	0	0	0	21	0	0	0	0	0	0	0	0	0	0	0	0	0	0	0	0	0
119S2	2	EPP Soamihary	2003-02-03	2	0	8	37.3	1	0	0	0	0	0	0	19	0	0	0	0	0	0	0	0	0	0	0	0	0	0	0	0	0
120S2	2	EPP Soamihary	2003-02-03	2	0	8	36.9	0	0	0	0	0	0	0	17	0	0	0	0	0	0	0	0	0	0	0	0	0	0	0	0	0
121S2	2	EPP Soamihary	2003-02-03	2	0	9	37.6	1	0	0	0	0	0	0	18	0	0	0	0	0	0	0	0	0	0	0	0	0	0	0	0	0
122S2	2	EPP Soamihary	2003-02-03	2	0	12	36.7	0	0	0	0	0	0	0	22	0	0	0	0	0	0	0	0	0	0	0	0	0	0	0	0	0
123S2	2	EPP Soamihary	2003-02-03	2	0	7	37.4	1	0	0	0	0	0	0	20	0	0	0	0	0	0	0	0	0	0	0	0	0	0	0	0	0
124S2	2	EPP Soamihary	2003-02-03	2	1	7	37.1	1	0	0	0	0	0	0	16	0	0	0	0	0	0	0	0	0	0	0	0	0	0	0	0	0
125S2	2	EPP Soamihary	2003-02-03	2	1	8	37.2	1	0	0	0	0	0	0	17	0	0	0	0	0	0	0	0	0	0	0	0	0	0	0	0	0
126S2	2	EPP Soamihary	2003-02-03	2	1	9	37.4	1	1	0	0	0	1	2	21	1	4000	0	0	0	0	0	0	0	0	0	0	0	0	0	0	1
127S2	2	EPP Soamihary	2003-02-03	2	1	9	36.9	0	0	0	0	0	0	0	21	0	0	0	0	0	0	0	0	0	0	0	0	0	0	0	0	0
128S2	2	EPP Soamihary	2003-02-03	2	1	8	36.3	0	0	0	0	0	0	0	23	0	0	0	0	0	0	0	0	0	0	0	0	0	0	0	0	0
129S2	2	EPP Soamihary	2003-02-03	2	0	9	36.4	0	0	0	0	0	0	0	23	0	0	0	0	0	0	0	0	0	0	0	0	0	0	0	0	0
130S2	2	EPP Soamihary	2003-02-03	2	0	9	37.3	1	0	0	0	0	0	0	21	0	0	0	0	0	0	0	0	0	0	0	0	0	0	0	0	0
131S2	2	EPP Soamihary	2003-02-03	2	0	10	37.2	1	0	0	0	0	0	0	17	0	0	0	0	0	0	0	0	0	0	0	0	0	0	0	0	0
132S2	2	EPP Soamihary	2003-02-03	2	0	8	36.7	0	0	0	0	0	0	3	21	0	0	0	0	0	0	0	0	0	0	0	0	0	0	0	0	0
133S2	2	EPP Soamihary	2003-02-03	2	1	10	36.5	0	0	0	0	0	0	0	25	0	0	0	0	0	0	0	0	0	0	0	0	0	0	0	0	0
134S2	2	EPP Soamihary	2003-02-03	2	1	10	36.7	0	0	0	0	0	0	3	22	0	0	0	0	0	0	0	0	0	0	0	0	0	0	0	0	0
135S2	2	EPP Soamihary	2003-02-03	2	1	10	36.7	0	0	0	0	0	0	0	21	0	0	0	0	0	0	0	0	0	0	0	0	0	0	0	0	0
136S2	2	EPP Soamihary	2003-02-03	2	1	9	36.9	0	0	0	0	0	0	0	18	1	618.35	0	0	0	0	0	0	0	0	0	0	0	0	0	0	1
137S2	2	EPP Soamihary	2003-02-03	2	1	10	36.7	0	0	0	0	0	0	0	23	0	0	0	0	0	0	0	0	0	0	0	0	0	0	0	0	0
138S2	2	EPP Soamihary	2003-02-03	2	1	12	36.2	0	0	0	0	0	0	0	24	0	0	0	0	0	0	0	0	0	0	0	0	0	0	0	0	0
139S2	2	EPP Soamihary	2003-02-03	2	1	9	36.7	0	0	0	0	0	0	0	21	0	0	0	0	0	0	0	0	0	0	0	0	0	0	0	0	0
140S2	2	EPP Soamihary	2003-02-03	2	1	11	37.4	1	0	0	0	0	0	0	24	0	0	0	0	0	0	0	0	0	0	0	0	0	0	0	0	0
141S2	2	EPP Soamihary	2003-02-03	2	1	9	37.2	1	0	0	0	0	0	0	20	0	0	0	0	0	0	0	0	0	0	0	0	0	0	0	0	0
142S2	2	EPP Soamihary	2003-02-03	2	1	10	37.1	1	0	0	0	0	0	0	24	0	0	0	0	0	0	0	0	0	0	0	0	0	0	0	0	0
143S2	2	EPP Soamihary	2003-02-03	2	1	11	37.2	1	1	0	0	0	1	0	28	1	2346.15	1	31.93	0	0	0	0	0	0	0	0	0	0	0	0	1
144S2	2	EPP Soamihary	2003-02-03	2	1	10	36.7	0	0	0	0	0	0	0	22	0	0	0	0	0	0	0	0	0	0	0	0	0	0	0	0	0
145S2	2	EPP Soamihary	2003-02-03	2	1	10	37.1	1	0	0	0	0	0	0	27	0	0	0	0	0	0	0	0	0	0	0	0	0	0	0	0	0
146S2	2	EPP Soamihary	2003-02-03	2	1	8	36.6	0	0	0	0	0	0	0	24	0	0	0	0	0	0	0	0	0	0	0	0	0	0	0	0	0
147S2	2	EPP Soamihary	2003-02-03	2	1	11	37.2	1	0	0	0	0	0	0	28	0	0	0	0	0	0	0	0	0	0	0	0	0	0	0	0	0
148S2	2	EPP Soamihary	2003-02-03	2	1	10	36.6	0	0	0	0	0	0	0	26	1	11.11	0	0	0	0	0	0	0	0	0	0	0	0	0	0	1
149S2	2	EPP Soamihary	2003-02-03	2	1	9	36.3	0	0	0	0	0	0	0	28	0	0	0	0	0	0	0	0	0	0	0	0	0	0	0	0	0
150S2	2	EPP Soamihary	2003-02-03	2	0	9	37.3	1	0	0	0	0	0	0	25	0	0	0	0	0	0	0	0	0	0	0	0	0	0	0	0	0
151S2	2	EPP Soamihary	2003-02-03	2	0	8	37.2	1	0	0	0	0	0	0	23	0	0	0	0	0	0	0	0	0	0	0	0	0	0	0	0	0
152S2	2	EPP Soamihary	2003-02-03	2	0	10	36.7	0	0	0	0	0	0	0	17	1	3145.63	0	0	0	0	0	0	0	0	0	0	0	0	0	0	1
153S2	2	EPP Soamihary	2003-02-03	2	0	9	36.8	0	0	0	0	0	0	0	20	0	0	0	0	0	0	0	0	0	0	0	0	0	0	0	0	0
154S2	2	EPP Soamihary	2003-02-03	2	0	9	36.9	0	0	0	0	0	0	0	17	0	0	0	0	0	0	0	0	0	0	0	0	0	0	0	0	0
155S2	2	EPP Soamihary	2003-02-03	2	0	10	37.1	1	0	0	0	0	0	0	24	0	0	0	0	0	0	0	0	0	0	0	0	0	0	0	0	0
156S2	2	EPP Soamihary	2003-02-03	2	0	10	37.2	1	0	0	0	0	0	0	22	0	0	0	0	0	0	0	0	0	0	0	0	0	0	0	0	0
157S2	2	EPP Soamihary	2003-02-03	2	0	9	36.4	0	0	0	0	0	0	0	22	1	4800	0	0	0	0	0	0	0	0	0	0	0	0	0	0	1
158S2	2	EPP Soamihary	2003-02-03	2	0	10	36.5	0	0	0	0	0	0	0	23	0	0	0	0	0	0	0	0	0	0	0	0	0	0	0	0	0
159S2	2	EPP Soamihary	2003-02-03	2	0	10	36.7	0	0	0	0	0	0	0	24	1	94.86	0	0	0	0	0	0	0	0	0	0	0	0	0	0	1
160S2	2	EPP Soamihary	2003-02-03	2	0	8	36.9	0	0	0	0	0	0	0	23	0	0	0	0	0	0	0	0	0	0	0	0	0	0	0	0	0
161S2	2	EPP Soamihary	2003-02-03	2	0	11	37.1	1	1	0	0	0	1	0	32	1	2038.46	0	0	0	0	0	0	0	0	0	0	0	0	0	0	1
162S2	2	EPP Soamihary	2003-02-03	2	0	11	37.2	1	1	0	0	0	1	0	20	1	3572.81	1	80	0	0	0	0	0	0	0	0	0	0	0	0	1
163S2	2	EPP Soamihary	2003-02-03	2	0	11	36.2	0	0	0	0	0	0	0	21	0	0	0	0	0	0	0	0	0	0	0	0	0	0	0	0	0
164S2	2	EPP Soamihary	2003-02-03	2	0	9	37.2	1	0	0	0	0	0	0	24	0	0	0	0	0	0	0	0	0	0	0	0	0	0	0	0	0
165S2	2	EPP Soamihary	2003-02-03	2	0	8	36.8	0	0	0	0	0	0	0	19	0	0	0	0	0	0	0	0	0	0	0	0	0	0	0	0	0
166S2	2	EPP Soamihary	2003-02-03	2	0	8	36.8	0	0	0	0	0	0	0	19	0	0	0	0	0	0	0	0	0	0	0	0	0	0	0	0	0
167S2	2	EPP Soamihary	2003-02-03	2	0	9	36.8	0	0	0	0	0	0	0	22	0	0	0	0	0	0	0	0	0	0	0	0	0	0	0	0	0
168S2	2	EPP Soamihary	2003-02-03	2	0	9	36.9	0	0	0	0	0	0	0	24	0	0	0	0	0	0	0	0	0	0	0	0	0	0	0	0	0
169S2	2	EPP Soamihary	2003-02-03	2	0	9	37.2	1	0	0	0	0	0	0	25	0	0	0	0	0	0	0	0	0	0	0	0	0	0	0	0	0
170S2	2	EPP Soamihary	2003-02-03	2	0	10	36.7	0	0	0	0	0	0	0	30	0	0	0	0	0	0	0	0	0	0	0	0	0	0	0	0	0
171S2	2	EPP Soamihary	2003-02-03	2	0	10	36.7	0	0	0	0	0	0	0	27	0	0	0	0	0	0	0	0	0	0	0	0	0	0	0	0	0
172S2	2	EPP Soamihary	2003-02-03	2	0	10	36.7	0	0	0	0	0	0	0	19	1	8313.72	0	0	0	0	0	0	0	0	0	0	0	0	0	0	1
173S2	2	EPP Soamihary	2003-02-03	2	1	11	36.9	0	0	0	0	0	0	0	23	0	0	0	0	0	0	0	0	0	0	0	0	0	0	0	0	0
174S2	2	EPP Soamihary	2003-02-03	2	0	11	36.7	0	0	0	0	0	0	0	25	0	0	0	0	0	0	0	0	0	0	0	0	0	0	0	0	0
175S2	2	EPP Soamihary	2003-02-03	2	1	11	36.3	0	0	0	0	0	0	0	25	0	0	0	0	0	0	0	0	0	0	0	0	0	0	0	0	0
176S2	2	EPP Soamihary	2003-02-03	2	0	11	37.3	1	0	0	0	0	0	0	25	0	0	0	0	0	0	0	0	0	0	0	0	0	0	0	0	0
177S2	2	EPP Soamihary	2003-02-03	2	0	11	37	1	1	0	0	0	1	2	26	1	1242.71	0	0	0	0	0	0	0	0	0	0	0	0	0	0	1
178S2	2	EPP Soamihary	2003-02-03	2	0	11	36.7	0	0	0	0	0	0	0	26	0	0	0	0	0	0	0	0	0	0	0	0	0	0	0	0	0
179S2	2	EPP Soamihary	2003-02-03	2	0	11	36.7	0	0	0	0	0	0	0	25	1	618.35	0	0	0	0	0	0	0	0	0	0	0	0	0	0	1
180S2	2	EPP Soamihary	2003-02-03	2	0	11	37	1	0	0	0	0	0	0	26	0	0	0	0	0	0	0	0	0	0	0	0	0	0	0	0	0
181S2	2	EPP Soamihary	2003-02-03	2	0	11	36.2	0	0	0	0	0	0	0	26	0	0	0	0	0	0	0	0	0	0	0	0	0	0	0	0	0
182S2	2	EPP Soamihary	2003-02-03	2	1	11	36.4	0	0	0	0	0	0	0	23	0	0	0	0	0	0	0	0	0	0	0	0	0	0	0	0	0
183S2	2	EPP Soamihary	2003-02-03	2	0	11	36.7	0	0	0	0	0	0	0	24	0	0	0	0	0	0	0	0	0	0	0	0	0	0	0	0	0
184S2	2	EPP Soamihary	2003-02-03	2	0	11	37.2	1	0	0	0	0	0	0	29	0	0	0	0	0	0	0	0	0	0	0	0	0	0	0	0	0
185S2	2	EPP Soamihary	2003-02-03	2	0	11	36.9	0	0	0	0	0	0	0	38	1	94.11	1	62.74	0	0	0	0	0	0	0	0	0	0	0	0	1
186S2	2	EPP Soamihary	2003-02-03	2	1	12	36.8	0	0	0	0	0	0	0	29	0	0	0	0	0	0	0	0	0	0	0	0	0	0	0	0	0
187S2	2	EPP Soamihary	2003-02-03	2	1	12	36.3	0	0	0	0	0	0	0	26	0	0	0	0	0	0	0	0	0	0	0	0	0	0	0	0	0
188S2	2	EPP Soamihary	2003-02-03	2	1	12	37.3	1	0	0	0	0	0	0	22	0	0	0	0	0	0	0	0	0	0	0	0	0	0	0	0	0
189S2	2	EPP Soamihary	2003-02-03	2	1	12	37.1	1	0	0	0	0	0	0	19	0	0	0	0	0	0	0	0	0	0	0	0	0	0	0	0	0
190S2	2	EPP Soamihary	2003-02-03	2	0	12	36.9	0	0	0	0	0	0	0	28	0	0	0	0	0	0	0	0	0	0	0	0	0	0	0	0	0
191S2	2	EPP Soamihary	2003-02-03	2	1	11	36.3	0	0	0	0	0	0	2	22	0	0	0	0	0	0	0	0	0	0	0	0	1	893.2	0	0	1
192S2	2	EPP Soamihary	2003-02-03	2	1	7	36.8	0	0	0	0	0	0	0	17	0	0	0	0	0	0	0	0	0	0	0	0	0	0	0	0	0
193S2	2	EPP Soamihary	2003-02-03	2	1	8	36.7	0	0	0	0	0	0	0	21	0	0	0	0	0	0	0	0	0	0	0	0	0	0	0	0	0
194S2	2	EPP Soamihary	2003-02-03	2	1	10	37.1	1	1	0	0	0	1	0	24	1	2396.13	0	0	0	0	0	0	0	0	0	0	0	0	0	0	1
195S2	2	EPP Soamihary	2003-02-03	2	1	8	36.6	0	0	0	0	0	0	0	18	1	1333.33	0	0	0	0	0	0	0	0	0	0	0	0	0	0	1
196S2	2	EPP Soamihary	2003-02-03	2	0	10	36.2	0	0	0	0	0	0	0	23	0	0	0	0	0	0	0	0	0	0	0	0	0	0	0	0	0
197S2	2	EPP Soamihary	2003-02-03	2	0	11	36.2	0	0	0	0	0	0	0	30	1	557.21	0	0	0	0	0	0	0	0	0	0	0	0	0	0	1
198S2	2	EPP Soamihary	2003-02-03	2	0	9	36.7	0	0	0	0	0	0	2	22	1	1058.82	0	0	0	0	0	0	0	0	0	0	0	0	0	0	1
199S2	2	EPP Soamihary	2003-02-03	2	0	12	37.1	1	0	0	0	0	0	0	27	0	0	0	0	0	0	0	0	0	0	0	0	0	0	0	0	0
200S2	2	EPP Soamihary	2003-02-03	2	1	10	36.9	0	0	0	0	0	0	0	21	0	0	0	0	0	0	0	0	0	0	0	0	0	0	0	0	0
201S2	2	EPP Soamihary	2003-02-03	2	1	7	36.9	0	0	0	0	0	0	0	19	1	4039.21	0	0	0	0	0	0	0	0	0	0	0	0	0	0	1
202S2	2	EPP Soamihary	2003-02-03	2	1	7	36.8	0	0	0	0	0	0	0	17	0	0	0	0	0	0	0	0	0	0	0	0	0	0	0	0	0
1S3	2	EPP Andranonahoatra	2003-05-27	3	1	7	36.7	0	0	0	0	0	0	0	16	1	46.06	0	0	0	0	0	0	0	0	0	0	0	0	0	0	1
2S3	2	EPP Andranonahoatra	2003-05-27	3	1	9	36.9	0	0	0	0	0	0	0	18	0	0	0	0	0	0	0	0	0	0	0	0	0	0	0	0	0
3S3	2	EPP Andranonahoatra	2003-05-27	3	1	9	37.1	1	0	0	0	0	0	0	19	0	0	0	0	0	0	0	0	0	0	0	0	0	0	0	0	0
4S3	2	EPP Andranonahoatra	2003-05-27	3	1	9	36.8	0	0	0	0	0	0	1	22	0	0	0	0	0	0	0	0	0	0	0	0	0	0	0	0	0
5S3	2	EPP Andranonahoatra	2003-05-27	3	1	7	36.6	0	0	0	0	0	0	0	22	0	0	0	0	0	0	0	0	0	0	0	0	0	0	0	0	0
6S3	2	EPP Andranonahoatra	2003-05-27	3	1	7	36.1	0	0	0	0	0	0	0	18	0	0	0	0	0	0	0	0	0	0	0	0	0	0	0	0	0
7S3	2	EPP Andranonahoatra	2003-05-27	3	1	7	36.6	0	0	0	0	0	0	0	15	0	0	0	0	0	0	0	0	0	0	0	0	0	0	0	0	0
8S3	2	EPP Andranonahoatra	2003-05-27	3	1	9	36.8	0	0	0	0	0	0	0	20	0	0	0	0	0	0	0	0	0	0	0	0	0	0	0	0	0
9S3	2	EPP Andranonahoatra	2003-05-27	3	1	7	36.6	0	0	0	0	0	0	0	19	0	0	0	0	0	0	0	0	0	0	0	0	0	0	0	0	0
10S3	2	EPP Andranonahoatra	2003-05-27	3	1	8	36.7	0	0	0	0	0	0	0	18	0	0	0	0	0	0	0	0	0	0	0	0	0	0	0	0	0
11S3	2	EPP Andranonahoatra	2003-05-27	3	1	7	37.5	1	0	0	0	0	0	0	19	0	0	0	0	0	0	0	0	0	0	0	0	0	0	0	0	0
12S3	2	EPP Andranonahoatra	2003-05-27	3	0	7	36.6	0	0	0	0	0	0	0	17	0	0	0	0	0	0	0	0	0	0	0	0	0	0	0	0	0
13S3	2	EPP Andranonahoatra	2003-05-27	3	0	8	36.8	0	0	0	0	0	0	0	21	0	0	0	0	0	0	0	0	0	0	0	0	0	0	0	0	0
14S3	2	EPP Andranonahoatra	2003-05-27	3	0	7	37.3	1	0	0	0	0	0	0	15	0	0	0	0	0	0	0	0	0	0	0	0	0	0	0	0	0
15S3	2	EPP Andranonahoatra	2003-05-27	3	0	7	36.8	0	0	0	0	0	0	0	21	0	0	0	0	0	0	0	0	0	0	0	0	0	0	0	0	0
16S3	2	EPP Andranonahoatra	2003-05-27	3	0	7	36.3	0	0	0	0	0	0	0	17	0	0	0	0	0	0	0	0	0	0	0	0	0	0	0	0	0
17S3	2	EPP Andranonahoatra	2003-05-27	3	0	10	36.9	0	0	0	0	0	0	0	17	1	343.75	0	0	0	0	0	0	0	0	0	0	0	0	0	0	1
18S3	2	EPP Andranonahoatra	2003-05-27	3	0	8	36.7	0	0	0	0	0	0	0	18	0	0	0	0	0	0	0	0	0	0	0	0	0	0	0	0	0
19S3	2	EPP Andranonahoatra	2003-05-27	3	0	8	36.6	0	0	0	0	0	0	0	20	0	0	0	0	0	0	0	0	0	0	0	0	0	0	0	0	0
20S3	2	EPP Andranonahoatra	2003-05-27	3	0	7	36.7	0	0	0	0	0	0	0	19	0	0	0	0	0	0	0	0	0	0	0	0	0	0	0	0	0
21S3	2	EPP Andranonahoatra	2003-05-27	3	0	9	37.1	1	0	0	0	0	0	0	21	0	0	0	0	0	0	0	0	0	0	0	0	0	0	0	0	0
22S3	2	EPP Andranonahoatra	2003-05-27	3	0	11	37.1	1	1	0	0	0	1	0	20	1	421.05	0	0	0	0	0	0	0	0	0	0	0	0	0	0	1
23S3	2	EPP Andranonahoatra	2003-05-27	3	0	7	37.2	1	0	0	0	0	0	0	17	0	0	0	0	0	0	0	0	0	0	0	0	0	0	0	0	0
24S3	2	EPP Andranonahoatra	2003-05-27	3	0	7	36.8	0	0	0	0	0	0	0	21	0	0	0	0	0	0	0	0	0	0	0	0	0	0	0	0	0
25S3	2	EPP Andranonahoatra	2003-05-27	3	0	10	36.6	0	0	0	0	0	0	0	16	0	0	0	0	0	0	0	0	0	0	0	0	0	0	0	0	0
26S3	2	EPP Andranonahoatra	2003-05-27	3	0	10	37.1	1	0	0	0	0	0	0	22	0	0	0	0	0	0	0	0	0	0	0	0	0	0	0	0	0
27S3	2	EPP Andranonahoatra	2003-05-27	3	0	8	37.3	1	0	0	0	0	0	0	21	0	0	0	0	0	0	0	0	0	0	0	0	0	0	0	0	0
28S3	2	EPP Andranonahoatra	2003-05-27	3	0	9	37.1	1	0	0	0	0	0	0	20	0	0	0	0	0	0	0	0	0	0	0	0	0	0	0	0	0
29S3	2	EPP Andranonahoatra	2003-05-27	3	0	9	37.1	1	0	0	0	0	0	0	24	0	0	0	0	0	0	0	0	0	0	0	0	0	0	0	0	0
30S3	2	EPP Andranonahoatra	2003-05-27	3	0	11	36.9	0	0	0	0	0	0	0	24	1	209.34	0	0	0	0	0	0	0	0	0	0	0	0	0	0	1
31S3	2	EPP Andranonahoatra	2003-05-27	3	0	8	37.4	1	0	0	0	0	0	0	21	0	0	0	0	0	0	0	0	0	0	0	0	0	0	0	0	0
32S3	2	EPP Andranonahoatra	2003-05-27	3	0	9	36.9	0	0	0	0	0	0	0	21	0	0	0	0	0	0	0	0	0	0	0	0	0	0	0	0	0
33S3	2	EPP Andranonahoatra	2003-05-27	3	0	7	37.2	1	1	0	0	0	1	0	18	1	740.74	0	0	0	0	0	0	0	0	0	0	0	0	0	0	1
34S3	2	EPP Andranonahoatra	2003-05-27	3	0	8	36	0	0	0	0	0	0	0	18	0	0	0	0	0	0	0	0	0	0	0	0	0	0	0	0	0
35S3	2	EPP Andranonahoatra	2003-05-27	3	0	7	36.9	0	0	0	0	0	0	0	16	0	0	0	0	0	0	0	0	0	0	0	0	0	0	0	0	0
36S3	2	EPP Andranonahoatra	2003-05-27	3	0	8	36.6	0	0	0	0	0	0	0	15	0	0	0	0	0	0	0	0	0	0	0	0	0	0	0	0	0
37S3	2	EPP Andranonahoatra	2003-05-27	3	0	8	37.2	1	0	0	0	0	0	0	22	0	0	0	0	0	0	0	0	0	0	0	0	0	0	0	0	0
38S3	2	EPP Andranonahoatra	2003-05-27	3	0	9	37.2	1	0	0	0	0	0	0	19	0	0	0	0	0	0	0	0	0	0	0	0	0	0	0	0	0
39S3	2	EPP Andranonahoatra	2003-05-27	3	1	8	36.7	0	0	0	0	0	0	0	20	1	229.44	0	0	0	0	0	0	0	0	0	0	0	0	0	0	1
40S3	2	EPP Andranonahoatra	2003-05-27	3	1	8	36.8	0	0	0	0	0	0	0	22	0	0	0	0	0	0	0	0	0	0	0	0	0	0	0	0	0
41S3	2	EPP Andranonahoatra	2003-05-27	3	1	8	36.5	0	0	0	0	0	0	0	19	0	0	0	0	0	0	0	0	0	0	0	0	0	0	0	0	0
42S3	2	EPP Andranonahoatra	2003-05-27	3	0	8	36.7	0	0	0	0	0	0	0	20	0	0	0	0	0	0	0	0	0	0	0	0	0	0	0	0	0
43S3	2	EPP Andranonahoatra	2003-05-27	3	0	8	36.1	0	0	0	0	0	0	0	17	0	0	0	0	0	0	0	0	0	0	0	0	0	0	0	0	0
44S3	2	EPP Andranonahoatra	2003-05-27	3	0	9	37.1	1	0	0	0	0	0	0	22	0	0	0	0	0	0	0	0	0	0	0	0	0	0	0	0	0
45S3	2	EPP Andranonahoatra	2003-05-27	3	0	9	37	1	0	0	0	0	0	0	21	0	0	0	0	0	0	0	0	0	0	0	0	0	0	0	0	0
46S3	2	EPP Andranonahoatra	2003-05-27	3	0	9	36.9	0	0	0	0	0	0	0	18	0	0	0	0	0	0	0	0	0	0	0	0	0	0	0	0	0
47S3	2	EPP Andranonahoatra	2003-05-27	3	0	11	36.6	0	0	0	0	0	0	0	30	0	0	0	0	0	0	0	0	0	0	0	0	0	0	0	0	0
48S3	2	EPP Andranonahoatra	2003-05-27	3	1	12	36.5	0	0	0	0	0	0	2	26	1	15.26	0	0	0	0	0	0	0	0	0	0	0	0	0	0	1
49S3	2	EPP Andranonahoatra	2003-05-27	3	1	11	36.6	0	0	0	0	0	0	0	27	0	0	0	0	0	0	0	0	0	0	0	0	0	0	0	0	0
50S3	2	EPP Andranonahoatra	2003-05-27	3	0	8	36.7	0	0	0	0	0	0	0	25	0	0	0	0	0	0	0	0	0	0	0	0	0	0	0	0	0
51S3	2	EPP Andranonahoatra	2003-05-27	3	0	11	36.3	0	0	0	0	0	0	0	27	0	0	0	0	0	0	0	0	0	0	0	0	0	0	0	0	0
52S3	2	EPP Andranonahoatra	2003-05-27	3	1	11	36.8	0	0	0	0	0	0	0	25	0	0	0	0	0	0	0	0	0	0	0	0	0	0	0	0	0
53S3	2	EPP Andranonahoatra	2003-05-27	3	1	10	37.1	1	0	0	0	0	0	0	25	0	0	0	0	0	0	0	0	0	0	0	0	0	0	0	0	0
54S3	2	EPP Andranonahoatra	2003-05-27	3	1	10	37.4	1	0	0	0	0	0	0	21	0	0	0	0	0	0	0	0	0	0	0	0	0	0	0	0	0
55S3	2	EPP Andranonahoatra	2003-05-27	3	1	10	36.8	0	0	0	0	0	0	0	23	0	0	0	0	0	0	0	0	0	0	0	0	0	0	0	0	0
56S3	2	EPP Andranonahoatra	2003-05-27	3	0	10	36.9	0	0	0	0	0	0	0	21	0	0	0	0	0	0	0	0	0	0	0	0	0	0	0	0	0
57S3	2	EPP Andranonahoatra	2003-05-27	3	0	10	37.1	1	0	0	0	0	0	0	28	0	0	0	0	0	0	0	0	0	0	0	0	0	0	0	0	0
58S3	2	EPP Andranonahoatra	2003-05-27	3	0	10	37.1	1	0	0	0	0	0	0	25	0	0	0	0	0	0	0	0	0	0	0	0	0	0	0	0	0
59S3	2	EPP Andranonahoatra	2003-05-27	3	0	12	37.2	1	0	0	0	0	0	0	28	0	0	0	0	0	0	0	0	0	0	0	0	0	0	0	0	0
60S3	2	EPP Andranonahoatra	2003-05-27	3	1	7	37.1	1	0	0	0	0	0	0	30	0	0	0	0	0	0	0	0	0	0	0	0	0	0	0	0	0
61S3	2	EPP Andranonahoatra	2003-05-27	3	0	10	37.4	1	0	0	0	0	0	0	26	0	0	0	0	0	0	0	0	0	0	0	0	0	0	0	0	0
62S3	2	EPP Andranonahoatra	2003-05-27	3	1	11	36.8	0	0	0	0	0	0	0	29	0	0	0	0	0	0	0	0	0	0	0	0	0	0	0	0	0
63S3	2	EPP Andranonahoatra	2003-05-27	3	0	9	36.2	0	0	0	0	0	0	0	22	0	0	0	0	0	0	0	0	0	0	0	0	0	0	0	0	0
64S3	2	EPP Andranonahoatra	2003-05-27	3	0	9	36.7	0	0	0	0	0	0	0	26	0	0	0	0	0	0	0	0	0	0	0	0	0	0	0	0	0
65S3	2	EPP Andranonahoatra	2003-05-27	3	0	9	36.8	0	0	0	0	0	0	0	21	0	0	0	0	0	0	0	0	0	0	0	0	0	0	0	0	0
66S3	2	EPP Andranonahoatra	2003-05-27	3	0	8	36.4	0	0	0	0	0	0	0	29	0	0	0	0	0	0	0	0	0	0	0	0	0	0	0	0	0
67S3	2	EPP Andranonahoatra	2003-05-27	3	1	10	36.1	0	0	0	0	0	0	0	32	0	0	0	0	0	0	0	0	0	0	0	0	0	0	0	0	0
68S3	2	EPP Andranonahoatra	2003-05-27	3	0	10	36.7	0	0	0	0	0	0	0	30	0	0	0	0	0	0	0	0	0	0	0	0	0	0	0	0	0
69S3	2	EPP Andranonahoatra	2003-05-27	3	1	11	36.1	0	0	0	0	0	0	0	29	0	0	0	0	0	0	0	0	0	0	0	0	0	0	0	0	0
70S3	2	EPP Andranonahoatra	2003-05-27	3	0	9	36.8	0	0	0	0	0	0	0	19	0	0	0	0	0	0	0	0	0	0	0	0	0	0	0	0	0
71S3	2	EPP Andranonahoatra	2003-05-27	3	0	9	36.6	0	0	0	0	0	0	0	24	0	0	0	0	0	0	0	0	0	0	0	0	0	0	0	0	0
72S3	2	EPP Andranonahoatra	2003-05-27	3	1	12	36.9	0	0	0	0	0	0	0	25	1	31.62	0	0	0	0	0	0	0	0	0	0	0	0	0	0	1
73S3	2	EPP Andranonahoatra	2003-05-27	3	1	12	36.7	0	0	0	0	0	0	0	30	0	0	0	0	0	0	0	0	0	0	0	0	0	0	0	0	0
74S3	2	EPP Andranonahoatra	2003-05-27	3	1	11	37.1	1	0	0	0	0	0	0	25	0	0	0	0	0	0	0	0	0	0	0	0	0	0	0	0	0
75S3	2	EPP Andranonahoatra	2003-05-27	3	1	11	37.6	1	0	0	0	0	0	0	29	0	0	0	0	0	0	0	0	0	0	0	0	0	0	0	0	0
76S3	2	EPP Andranonahoatra	2003-05-27	3	0	10	36.6	0	0	0	0	0	0	2	24	1	31.37	0	0	0	0	0	0	0	0	0	0	0	0	0	0	1
77S3	2	EPP Andranonahoatra	2003-05-27	3	0	9	36.6	0	0	0	0	0	0	0	20	0	0	0	0	0	0	0	0	0	0	0	0	1	79.84	0	0	1
78S3	2	EPP Andranonahoatra	2003-05-27	3	0	12	36.6	0	0	0	0	0	0	0	29	1	128	0	0	0	0	0	0	0	0	0	0	0	0	0	0	1
79S3	2	EPP Andranonahoatra	2003-05-27	3	0	10	37.3	1	0	0	0	0	0	0	20	0	0	0	0	0	0	0	0	0	0	0	0	0	0	0	0	0
80S3	2	EPP Andranonahoatra	2003-05-27	3	0	11	37.3	1	0	0	0	0	0	0	22	0	0	0	0	0	0	0	0	0	0	0	0	0	0	0	0	0
81S3	2	EPP Andranonahoatra	2003-05-27	3	0	11	36.8	0	0	0	0	0	0	0	22	1	541.06	0	0	0	0	0	0	0	0	0	0	0	0	0	0	1
82S3	2	EPP Andranonahoatra	2003-05-27	3	0	11	36.4	0	0	0	0	0	0	0	25	0	0	0	0	0	0	0	0	0	0	0	0	0	0	0	0	0
83S3	2	EPP Andranonahoatra	2003-05-27	3	0	11	36.6	0	0	0	0	0	0	3	23	1	15.53	1	15.53	0	0	0	0	0	0	0	0	1	31.06	0	0	1
84S3	2	EPP Andranonahoatra	2003-05-27	3	1	11	37.2	1	0	0	0	0	0	0	26	0	0	0	0	0	0	0	0	0	0	0	0	0	0	0	0	0
85S3	2	EPP Andranonahoatra	2003-05-27	3	0	10	36.4	0	0	0	0	0	0	0	27	0	0	0	0	0	0	0	0	0	0	0	0	0	0	0	0	0
86S3	2	EPP Andranonahoatra	2003-05-27	3	0	12	36.8	0	0	0	0	0	0	0	31	0	0	0	0	0	0	0	0	0	0	0	0	0	0	0	0	0
87S3	2	EPP Andranonahoatra	2003-05-27	3	1	11	37.1	1	0	0	0	0	0	0	25	0	0	0	0	0	0	0	0	0	0	0	0	0	0	0	0	0
88S3	2	EPP Andranonahoatra	2003-05-27	3	1	12	37.1	1	0	0	0	0	0	0	34	0	0	0	0	0	0	0	0	0	0	0	0	0	0	0	0	0
89S3	2	EPP Andranonahoatra	2003-05-27	3	1	12	36.4	0	0	0	0	0	0	0	28	0	0	0	0	0	0	0	0	0	0	0	0	0	0	0	0	0
90S3	2	EPP Andranonahoatra	2003-05-27	3	0	11	36.7	0	0	0	0	0	0	0	26	0	0	0	0	0	0	0	0	0	0	0	0	0	0	0	0	0
91S3	2	EPP Andranonahoatra	2003-05-27	3	0	12	37	1	0	0	0	0	0	0	28	0	0	0	0	0	0	0	0	0	0	0	0	0	0	0	0	0
92S3	2	EPP Andranonahoatra	2003-05-27	3	1	12	37.2	1	0	0	0	0	0	0	29	0	0	0	0	0	0	0	0	0	0	0	0	0	0	0	0	0
93S3	2	EPP Andranonahoatra	2003-05-27	3	0	10	36.8	0	0	0	0	0	0	0	28	0	0	0	0	0	0	0	0	0	0	0	0	0	0	0	0	0
94S3	2	EPP Andranonahoatra	2003-05-27	3	0	11	36.1	0	0	0	0	0	0	0	19	0	0	0	0	0	0	0	0	0	0	0	0	0	0	0	0	0
95S3	2	EPP Andranonahoatra	2003-05-27	3	0	10	36.6	0	0	0	0	0	0	0	22	0	0	0	0	0	0	0	0	0	0	0	0	0	0	0	0	0
96S3	2	EPP Andranonahoatra	2003-05-27	3	0	11	36.6	0	0	0	0	0	0	0	29	0	0	1	31.87	0	0	0	0	0	0	0	0	0	0	0	0	1
97S3	2	EPP Andranonahoatra	2003-05-27	3	0	9	37.3	1	0	0	0	0	0	0	17	0	0	0	0	0	0	0	0	0	0	0	0	0	0	0	0	0
98S3	2	EPP Andranonahoatra	2003-05-27	3	0	12	36.1	0	0	0	0	0	0	0	35	0	0	0	0	0	0	0	0	0	0	0	0	0	0	0	0	0
99S3	2	EPP Andranonahoatra	2003-05-27	3	0	11	37.1	1	0	0	0	0	0	0	27	0	0	0	0	0	0	0	0	0	0	0	0	0	0	0	0	0
100S3	2	EPP Andranonahoatra	2003-05-27	3	1	12	36.9	0	0	0	0	0	0	0	34	0	0	0	0	0	0	0	0	0	0	0	0	0	0	0	0	0
101S3	2	EPP Soamihary	2003-05-27	3	1	11	36.9	0	0	0	0	0	0	0	25	0	0	0	0	0	0	0	0	0	0	0	0	0	0	0	0	0
102S3	2	EPP Soamihary	2003-05-27	3	0	7	36.3	0	0	0	0	0	0	0	17	0	0	0	0	0	0	0	0	0	0	0	0	0	0	0	0	0
103S3	2	EPP Soamihary	2003-05-27	3	0	7	36.6	0	0	0	0	0	0	0	18	0	0	0	0	0	0	0	0	0	0	0	0	0	0	0	0	0
104S3	2	EPP Soamihary	2003-05-27	3	0	7	37.2	1	0	0	0	0	0	0	17	0	0	0	0	0	0	0	0	0	0	0	0	0	0	0	0	0
105S3	2	EPP Soamihary	2003-05-27	3	0	7	36.9	0	0	0	0	0	0	0	18	0	0	0	0	0	0	0	0	0	0	0	0	0	0	0	0	0
106S3	2	EPP Soamihary	2003-05-27	3	0	12	36	0	0	0	0	0	0	0	24	1	721.31	0	0	0	0	0	0	0	0	0	0	0	0	0	0	1
107S3	2	EPP Soamihary	2003-05-27	3	1	7	36.7	0	0	0	0	0	0	0	20	0	0	0	0	0	0	0	0	0	0	0	0	0	0	0	0	0
108S3	2	EPP Soamihary	2003-05-27	3	1	9	37.2	1	1	0	0	0	1	0	20	1	1480	0	0	0	0	0	0	0	0	0	0	0	0	0	0	1
109S3	2	EPP Soamihary	2003-05-27	3	0	8	37	1	0	0	0	0	0	0	16	0	0	0	0	0	0	0	0	0	0	0	0	0	0	0	0	0
110S3	2	EPP Soamihary	2003-05-27	3	0	7	37	1	0	0	0	0	0	0	16	0	0	0	0	0	0	0	0	0	0	0	0	0	0	0	0	0
111S3	2	EPP Soamihary	2003-05-27	3	0	7	36.9	0	0	0	0	0	0	0	18	1	111	1	15.9	0	0	0	0	0	0	0	0	0	0	0	0	1
112S3	2	EPP Soamihary	2003-05-27	3	0	7	36.8	0	0	0	0	0	0	0	19	0	0	0	0	0	0	0	0	0	0	0	0	0	0	0	0	0
113S3	2	EPP Soamihary	2003-05-27	3	0	8	37.5	1	0	0	0	0	0	0	20	0	0	0	0	0	0	0	0	0	0	0	0	0	0	0	0	0
114S3	2	EPP Soamihary	2003-05-27	3	0	8	37.3	1	0	0	0	1	1	0	18	0	0	0	0	0	0	0	0	0	0	0	0	1	48	0	0	1
115S3	2	EPP Soamihary	2003-05-27	3	0	7	37.1	1	0	0	0	0	0	0	15	0	0	0	0	0	0	0	0	0	0	0	0	0	0	0	0	0
116S3	2	EPP Soamihary	2003-05-27	3	0	8	37.1	1	0	0	0	0	0	0	17	0	0	0	0	0	0	0	0	0	0	0	0	0	0	0	0	0
117S3	2	EPP Soamihary	2003-05-27	3	0	7	37.4	1	0	0	0	0	0	0	20	0	0	0	0	0	0	0	0	0	0	0	0	0	0	0	0	0
118S3	2	EPP Soamihary	2003-05-27	3	0	10	36.9	0	0	0	0	0	0	0	18	0	0	0	0	0	0	0	0	0	0	0	0	0	0	0	0	0
119S3	2	EPP Soamihary	2003-05-27	3	0	7	37.2	1	0	0	0	0	0	0	20	0	0	0	0	0	0	0	0	0	0	0	0	0	0	0	0	0
120S3	2	EPP Soamihary	2003-05-27	3	0	9	37.1	1	0	0	0	0	0	0	21	0	0	0	0	0	0	0	0	0	0	0	0	0	0	0	0	0
121S3	2	EPP Soamihary	2003-05-27	3	0	12	36.1	0	0	0	0	0	0	3	25	0	0	0	0	0	0	0	0	0	0	0	0	0	0	0	0	0
122S3	2	EPP Soamihary	2003-05-27	3	0	10	36.6	0	0	0	0	0	0	0	24	1	380	1	31.68	0	0	0	0	0	0	0	0	0	0	0	0	1
123S3	2	EPP Soamihary	2003-05-27	3	0	10	37.6	1	0	0	0	0	0	0	22	0	0	0	0	0	0	0	0	0	0	0	0	0	0	0	0	0
124S3	2	EPP Soamihary	2003-05-27	3	0	11	36.8	0	0	0	0	0	0	0	22	0	0	0	0	0	0	0	0	0	0	0	0	0	0	0	0	0
125S3	2	EPP Soamihary	2003-05-27	3	0	12	36.9	0	0	0	0	0	0	0	28	1	78.43	0	0	0	0	0	0	0	0	0	0	0	0	0	0	1
126S3	2	EPP Soamihary	2003-05-27	3	0	8	37.6	1	0	0	0	0	0	0	19	0	0	0	0	0	0	0	0	0	0	0	0	0	0	0	0	0
127S3	2	EPP Soamihary	2003-05-27	3	0	10	36.7	0	0	0	0	0	0	0	24	0	0	0	0	0	0	0	0	0	0	0	0	0	0	0	0	0
128S3	2	EPP Soamihary	2003-05-27	3	1	12	37.1	1	0	0	0	0	0	0	22	0	0	0	0	0	0	0	0	0	0	0	0	0	0	0	0	0
129S3	2	EPP Soamihary	2003-05-27	3	1	7	37.7	1	0	0	0	0	0	0	17	0	0	0	0	0	0	0	0	0	0	0	0	0	0	0	0	0
130S3	2	EPP Soamihary	2003-05-27	3	1	8	36.4	0	0	0	0	0	0	0	15	0	0	0	0	0	0	0	0	0	0	0	0	0	0	0	0	0
131S3	2	EPP Soamihary	2003-05-27	3	1	8	37.4	1	0	0	0	0	0	0	18	0	0	0	0	0	0	0	0	0	0	0	0	0	0	0	0	0
132S3	2	EPP Soamihary	2003-05-27	3	1	8	37.4	1	0	0	0	0	0	0	21	0	0	0	0	0	0	0	0	0	0	0	0	0	0	0	0	0
133S3	2	EPP Soamihary	2003-05-27	3	1	8	36.9	0	0	0	0	0	0	0	20	0	0	0	0	0	0	0	0	0	0	0	0	0	0	0	0	0
134S3	2	EPP Soamihary	2003-05-27	3	1	11	36.5	0	0	0	0	0	0	0	26	0	0	0	0	0	0	0	0	0	0	0	0	0	0	0	0	0
135S3	2	EPP Soamihary	2003-05-27	3	1	12	37.2	1	0	0	0	0	0	0	19	0	0	0	0	0	0	0	0	0	0	0	0	0	0	0	0	0
136S3	2	EPP Soamihary	2003-05-27	3	1	9	37.8	1	0	0	0	0	0	0	19	0	0	0	0	0	0	0	0	0	0	0	0	0	0	0	0	0
137S3	2	EPP Soamihary	2003-05-27	3	1	8	37.2	1	1	0	0	0	1	0	18	1	48.8	0	0	0	0	0	0	0	0	0	0	0	0	0	0	1
138S3	2	EPP Soamihary	2003-05-27	3	0	8	36.5	0	0	0	0	0	0	0	18	1	140.07	0	0	0	0	0	0	0	0	0	0	0	0	0	0	1
139S3	2	EPP Soamihary	2003-05-27	3	1	8	37.2	1	0	0	0	0	0	0	18	0	0	0	0	0	0	0	0	0	0	0	0	0	0	0	0	0
140S3	2	EPP Soamihary	2003-05-27	3	1	10	37.3	1	0	0	0	0	0	2	24	0	0	0	0	0	0	0	0	0	0	0	0	0	0	0	0	0
141S3	2	EPP Soamihary	2003-05-27	3	1	10	36.9	0	0	0	0	0	0	0	21	0	0	0	0	0	0	0	0	0	0	0	0	0	0	0	0	0
142S3	2	EPP Soamihary	2003-05-27	3	1	8	37.3	1	1	0	0	0	1	0	19	1	303.39	1	15.96	0	0	0	0	0	0	0	0	0	0	0	0	1
143S3	2	EPP Soamihary	2003-05-27	3	1	8	36.4	0	0	0	0	0	0	0	17	0	0	0	0	0	0	0	0	0	0	0	0	0	0	0	0	0
144S3	2	EPP Soamihary	2003-05-27	3	1	10	37.5	1	0	0	0	0	0	0	20	0	0	0	0	0	0	0	0	0	0	0	0	0	0	0	0	0
145S3	2	EPP Soamihary	2003-05-27	3	1	8	36.7	0	0	0	0	0	0	0	22	1	31.43	0	0	0	0	0	0	0	0	0	0	0	0	0	0	1
146S3	2	EPP Soamihary	2003-05-27	3	1	7	37.6	1	0	0	0	0	0	0	17	0	0	0	0	0	0	0	0	0	0	0	0	0	0	0	0	0
147S3	2	EPP Soamihary	2003-05-27	3	0	10	36.8	0	0	0	0	0	0	0	24	0	0	0	0	0	0	0	0	0	0	0	0	0	0	0	0	0
148S3	2	EPP Soamihary	2003-05-27	3	0	10	36.8	0	0	0	0	0	0	0	23	0	0	0	0	0	0	0	0	0	0	0	0	0	0	0	0	0
149S3	2	EPP Soamihary	2003-05-27	3	0	10	36.7	0	0	0	0	0	0	0	25	0	0	0	0	0	0	0	0	0	0	0	0	0	0	0	0	0
150S3	2	EPP Soamihary	2003-05-27	3	0	9	37.2	1	0	0	0	0	0	0	24	0	0	0	0	0	0	0	0	0	0	0	0	0	0	0	0	0
151S3	2	EPP Soamihary	2003-05-27	3	0	8	37	1	0	0	0	0	0	0	19	0	0	0	0	0	0	0	0	0	0	0	0	0	0	0	0	0
152S3	2	EPP Soamihary	2003-05-27	3	0	8	36.6	0	0	0	0	0	0	0	20	0	0	0	0	0	0	0	0	0	0	0	0	1	62.74	0	0	1
153S3	2	EPP Soamihary	2003-05-27	3	0	10	37.1	1	0	0	0	0	0	0	24	0	0	0	0	0	0	0	0	0	0	0	0	0	0	0	0	0
154S3	2	EPP Soamihary	2003-05-27	3	0	8	37.5	1	1	0	0	0	1	0	17	1	47.9	0	0	0	0	0	0	0	0	0	0	0	0	0	0	1
155S3	2	EPP Soamihary	2003-05-27	3	0	10	36.9	0	0	0	0	0	0	0	24	0	0	0	0	0	0	0	0	0	0	0	0	0	0	0	0	0
156S3	2	EPP Soamihary	2003-05-27	3	0	8	37.2	1	0	0	0	0	0	0	17	0	0	0	0	0	0	0	0	0	0	0	0	0	0	0	0	0
157S3	2	EPP Soamihary	2003-05-27	3	0	11	37.5	1	0	0	0	0	0	0	26	0	0	0	0	0	0	0	0	0	0	0	0	0	0	0	0	0
158S3	2	EPP Soamihary	2003-05-27	3	0	11	37.2	1	0	0	0	0	0	0	20	0	0	0	0	0	0	0	0	0	0	0	0	0	0	0	0	0
159S3	2	EPP Soamihary	2003-05-27	3	0	11	36.2	0	0	0	0	0	0	0	22	1	712.87	0	0	0	0	0	0	0	0	0	0	0	0	0	0	1
160S3	2	EPP Soamihary	2003-05-27	3	0	12	37.5	1	0	0	0	0	0	0	32	0	0	0	0	0	0	0	0	0	0	0	0	0	0	0	0	0
161S3	2	EPP Soamihary	2003-05-27	3	0	12	37.2	1	0	0	0	0	0	0	30	0	0	0	0	0	0	0	0	0	0	0	0	0	0	0	0	0
162S3	2	EPP Soamihary	2003-05-27	3	0	12	37.3	1	0	0	0	0	0	0	30	0	0	0	0	0	0	0	0	0	0	0	0	0	0	0	0	0
163S3	2	EPP Soamihary	2003-05-27	3	0	10	37.6	1	0	0	0	0	0	0	22	0	0	0	0	0	0	0	0	0	0	0	0	0	0	0	0	0
164S3	2	EPP Soamihary	2003-05-27	3	0	8	37.3	1	0	0	0	0	0	0	20	0	0	0	0	0	0	0	0	0	0	0	0	0	0	0	0	0
165S3	2	EPP Soamihary	2003-05-27	3	0	9	37.2	1	0	0	0	0	0	0	20	0	0	0	0	0	0	0	0	0	0	0	0	0	0	0	0	0
166S3	2	EPP Soamihary	2003-05-27	3	0	11	37.3	1	1	0	0	0	1	0	17	1	313.72	0	0	0	0	0	0	0	0	0	0	0	0	0	0	1
167S3	2	EPP Soamihary	2003-05-27	3	0	10	37.2	1	1	0	0	0	1	0	24	1	15.74	0	0	0	0	0	0	0	0	0	0	0	0	0	0	1
168S3	2	EPP Soamihary	2003-05-27	3	0	10	36.4	0	0	0	0	0	0	0	21	1	433.49	0	0	0	0	0	0	0	0	0	0	0	0	0	0	1
169S3	2	EPP Soamihary	2003-05-27	3	0	8	37.5	1	1	0	0	0	1	0	17	1	74.62	0	0	0	0	0	0	0	0	0	0	0	0	0	0	1
170S3	2	EPP Soamihary	2003-05-27	3	0	9	36.9	0	0	0	0	0	0	0	22	1	3119.26	0	0	0	0	0	0	0	0	0	0	0	0	0	0	1
171S3	2	EPP Soamihary	2003-05-27	3	0	10	37.7	1	0	0	0	0	0	0	24	0	0	0	0	0	0	0	0	0	0	0	0	0	0	0	0	0
172S3	2	EPP Soamihary	2003-05-27	3	0	10	37.2	1	0	0	0	0	0	0	21	0	0	0	0	0	0	0	0	0	0	0	0	0	0	0	0	0
173S3	2	EPP Soamihary	2003-05-27	3	0	9	37.2	1	0	0	0	0	0	0	24	0	0	0	0	0	0	0	0	0	0	0	0	0	0	0	0	0
174S3	2	EPP Soamihary	2003-05-27	3	0	11	37.3	1	0	0	0	0	0	0	22	0	0	0	0	0	0	0	0	0	0	0	0	0	0	0	0	0
175S3	2	EPP Soamihary	2003-05-27	3	1	10	37.3	1	0	0	0	0	0	0	22	0	0	0	0	0	0	0	0	0	0	0	0	0	0	0	0	0
176S3	2	EPP Soamihary	2003-05-27	3	1	9	37	1	0	0	0	0	0	0	20	0	0	0	0	0	0	0	0	0	0	0	0	0	0	0	0	0
177S3	2	EPP Soamihary	2003-05-27	3	1	9	36.6	0	0	0	0	0	0	0	16	1	60.6	0	0	0	0	0	0	0	0	0	0	0	0	0	0	1
178S3	2	EPP Soamihary	2003-05-27	3	1	10	37.2	1	0	0	0	0	0	2	20	0	0	0	0	0	0	0	0	0	0	0	0	0	0	0	0	0
179S3	2	EPP Soamihary	2003-05-27	3	1	10	37.1	1	0	0	0	0	0	0	24	0	0	0	0	0	0	0	0	0	0	0	0	0	0	0	0	0
180S3	2	EPP Soamihary	2003-05-27	3	1	10	36.7	0	0	0	0	0	0	0	22	0	0	0	0	0	0	0	0	0	0	0	0	0	0	0	0	0
181S3	2	EPP Soamihary	2003-05-27	3	1	10	36.8	0	0	0	0	0	0	0	25	0	0	0	0	0	0	0	0	0	0	0	0	0	0	0	0	0
182S3	2	EPP Soamihary	2003-05-27	3	1	8	37.1	1	1	0	0	0	1	0	23	1	158.41	0	0	0	0	0	0	0	0	0	0	0	0	0	0	1
183S3	2	EPP Soamihary	2003-05-27	3	1	10	36.5	0	0	0	0	0	0	3	22	1	502.41	0	0	0	0	0	0	0	0	0	0	0	0	0	0	1
184S3	2	EPP Soamihary	2003-05-27	3	1	10	40	1	1	0	0	0	1	0	26	1	22874.78	0	0	0	0	0	0	0	0	0	0	0	0	0	0	1
185S3	2	EPP Soamihary	2003-05-27	3	1	9	37.3	1	0	0	0	0	0	0	25	0	0	0	0	0	0	0	0	0	0	0	0	0	0	0	0	0
186S3	2	EPP Soamihary	2003-05-27	3	1	12	37.1	1	0	0	0	0	0	0	27	0	0	0	0	0	0	0	0	0	0	0	0	0	0	0	0	0
187S3	2	EPP Soamihary	2003-05-27	3	1	10	37.1	1	0	0	0	0	0	0	22	0	0	0	0	0	0	0	0	0	0	0	0	0	0	0	0	0
188S3	2	EPP Soamihary	2003-05-27	3	1	10	37.3	1	0	0	0	0	0	0	20	0	0	0	0	0	0	0	0	0	0	0	0	0	0	0	0	0
189S3	2	EPP Soamihary	2003-05-27	3	1	10	37.1	1	0	0	0	0	0	0	20	0	0	0	0	0	0	0	0	0	0	0	0	0	0	0	0	0
190S3	2	EPP Soamihary	2003-05-27	3	1	10	37.2	1	0	0	0	0	0	0	22	0	0	0	0	0	0	0	0	0	0	0	0	0	0	0	0	0
191S3	2	EPP Soamihary	2003-05-27	3	1	9	37.3	1	1	0	0	1	1	0	21	1	63.49	0	0	0	0	0	0	0	0	0	0	1	31.74	0	0	1
192S3	2	EPP Soamihary	2003-05-27	3	1	11	37.1	1	0	0	0	0	0	0	30	0	0	0	0	0	0	0	0	0	0	0	0	0	0	0	0	0
193S3	2	EPP Soamihary	2003-05-27	3	1	11	37.7	1	0	0	0	0	0	2	28	0	0	0	0	0	0	0	0	0	0	0	0	0	0	0	0	0
194S3	2	EPP Soamihary	2003-05-27	3	1	7	37.5	1	0	0	0	0	0	0	24	0	0	0	0	0	0	0	0	0	0	0	0	0	0	0	0	0
195S3	2	EPP Soamihary	2003-05-27	3	1	11	37	1	0	0	0	0	0	0	23	0	0	0	0	0	0	0	0	0	0	0	0	0	0	0	0	0
196S3	2	EPP Soamihary	2003-05-27	3	1	12	37.1	1	0	0	0	0	0	0	20	0	0	0	0	0	0	0	0	0	0	0	0	0	0	0	0	0
197S3	2	EPP Soamihary	2003-05-27	3	1	10	37.4	1	0	0	0	0	0	0	25	0	0	0	0	0	0	0	0	0	0	0	0	0	0	0	0	0
198S3	2	EPP Soamihary	2003-05-27	3	1	12	40.2	1	1	0	0	0	1	0	26	1	1863.01	0	0	0	0	0	0	0	0	0	0	0	0	0	0	1
199S3	2	EPP Soamihary	2003-05-27	3	1	6	36.1	0	0	0	0	0	0	0	16	1	2080	0	0	0	0	0	0	0	0	0	0	0	0	0	0	1
200S3	2	EPP Soamihary	2003-05-27	3	0	9	37.2	1	1	0	0	0	1	0	22	1	2947.36	0	0	0	0	0	0	0	0	0	0	0	0	0	0	1
201S3	2	EPP Soamihary	2003-05-27	3	0	11	36.9	0	0	0	0	0	0	0	30	0	0	0	0	0	0	0	0	0	0	0	0	0	0	0	0	0
1A1	3	EPP Analamiranga	2002-11-21	1	0	6	36.2	0	0	0	0	0	0	2	17	0	0	0	0	0	0	0	0	0	0	0	0	0	0	0	0	0
2A1	3	EPP Analamiranga	2002-11-21	1	0	6	36.3	0	0	0	0	0	0	0	17	0	0	0	0	0	0	0	0	0	0	0	0	0	0	0	0	0
3A1	3	EPP Analamiranga	2002-11-21	1	0	9	36.7	0	0	0	0	0	0	0	24	0	0	0	0	0	0	0	0	0	0	0	0	0	0	0	0	0
4A1	3	EPP Analamiranga	2002-11-21	1	0	9	36.2	0	0	0	0	0	0	0	23	0	0	0	0	0	0	0	0	0	0	0	0	0	0	0	0	0
5A1	3	EPP Analamiranga	2002-11-21	1	0	9	36.2	0	0	0	0	0	0	0	21	0	0	0	0	0	0	0	0	0	0	0	0	0	0	0	0	0
6A1	3	EPP Analamiranga	2002-11-21	1	0	10	36	0	0	0	0	0	0	0	24	0	0	0	0	0	0	0	0	0	0	0	0	0	0	0	0	0
7A1	3	EPP Analamiranga	2002-11-21	1	0	10	36.5	0	0	0	0	0	0	0	24	0	0	0	0	0	0	0	0	0	0	0	0	1	600	0	0	1
8A1	3	EPP Analamiranga	2002-11-21	1	0	8	36.8	0	0	0	0	0	0	0	18	0	0	0	0	0	0	0	0	0	0	0	0	0	0	0	0	0
9A1	3	EPP Analamiranga	2002-11-21	1	0	11	36.6	0	0	0	0	0	0	0	24	0	0	0	0	0	0	0	0	0	0	0	0	0	0	0	0	0
10A1	3	EPP Analamiranga	2002-11-21	1	0	11	36.9	0	0	0	0	0	0	0	21	0	0	0	0	0	0	0	0	0	0	0	0	0	0	0	0	0
11A1	3	EPP Analamiranga	2002-11-21	1	0	11	36.6	0	0	0	0	0	0	0	29	0	0	0	0	0	0	0	0	0	0	0	0	0	0	0	0	0
12A1	3	EPP Analamiranga	2002-11-21	1	0	12	36.7	0	0	0	0	0	0	0	36	0	0	0	0	0	0	0	0	0	0	0	0	0	0	0	0	0
13A1	3	EPP Analamiranga	2002-11-21	1	0	7	36.5	0	0	0	0	0	0	0	21	0	0	0	0	0	0	0	0	0	0	0	0	0	0	0	0	0
14A1	3	EPP Analamiranga	2002-11-21	1	1	10	36.9	0	0	0	0	0	0	0	28	0	0	0	0	0	0	0	0	0	0	0	0	0	0	0	0	0
15A1	3	EPP Analamiranga	2002-11-21	1	0	10	36.8	0	0	0	0	0	0	0	26	0	0	0	0	0	0	0	0	0	0	0	0	0	0	0	0	0
16A1	3	EPP Analamiranga	2002-11-21	1	1	10	36.4	0	0	0	0	0	0	0	22	0	0	0	0	0	0	0	0	0	0	0	0	0	0	0	0	0
17A1	3	EPP Analamiranga	2002-11-21	1	1	11	36.2	0	0	0	0	0	0	0	22	0	0	0	0	0	0	0	0	0	0	0	0	0	0	0	0	0
18A1	3	EPP Analamiranga	2002-11-21	1	1	11	37	1	0	0	0	0	0	0	26	0	0	0	0	0	0	0	0	0	0	0	0	0	0	0	0	0
19A1	3	EPP Analamiranga	2002-11-21	1	1	11	36.7	0	0	0	0	0	0	0	23	0	0	0	0	0	0	0	0	0	0	0	0	0	0	0	0	0
20A1	3	EPP Analamiranga	2002-11-21	1	1	8	36.4	0	0	0	0	0	0	0	22	0	0	0	0	0	0	0	0	0	0	0	0	0	0	0	0	0
21A1	3	EPP Analamiranga	2002-11-21	1	1	10	37.3	1	0	0	0	0	0	0	26	0	0	0	0	0	0	0	0	0	0	0	0	0	0	0	0	0
22A1	3	EPP Analamiranga	2002-11-21	1	1	11	36.6	0	0	0	0	0	0	0	31	0	0	0	0	0	0	0	0	0	0	0	0	0	0	0	0	0
23A1	3	EPP Analamiranga	2002-11-21	1	1	10	36.4	0	0	0	0	0	0	0	26	0	0	0	0	0	0	0	0	0	0	0	0	0	0	0	0	0
24A1	3	EPP Analamiranga	2002-11-21	1	0	10	36.4	0	0	0	0	0	0	0	26	0	0	0	0	0	0	0	0	0	0	0	0	0	0	0	0	0
25A1	3	EPP Analamiranga	2002-11-21	1	0	11	36.6	0	0	0	0	0	0	0	24	0	0	0	0	0	0	0	0	0	0	0	0	0	0	0	0	0
26A1	3	EPP Analamiranga	2002-11-21	1	0	7	36.4	0	0	0	0	0	0	0	16	1	320	0	0	0	0	0	0	0	0	0	0	0	0	0	0	1
27A1	3	EPP Analamiranga	2002-11-21	1	0	6	37	1	0	0	0	0	0	0	14	0	0	0	0	0	0	0	0	0	0	0	0	0	0	0	0	0
28A1	3	EPP Analamiranga	2002-11-21	1	0	6	36.8	0	0	0	0	0	0	0	15	0	0	0	0	0	0	0	0	0	0	0	0	0	0	0	0	0
29A1	3	EPP Analamiranga	2002-11-21	1	0	6	37	1	0	0	0	1	1	0	17	0	0	0	0	0	0	0	0	0	0	0	0	1	7360	0	0	1
30A1	3	EPP Analamiranga	2002-11-21	1	0	6	36.5	0	0	0	0	0	0	0	18	0	0	0	0	0	0	0	0	0	0	0	0	0	0	0	0	0
31A1	3	EPP Analamiranga	2002-11-21	1	0	7	37.2	1	0	0	0	0	0	2	24	0	0	0	0	0	0	0	0	0	0	0	0	0	0	0	0	0
32A1	3	EPP Analamiranga	2002-11-21	1	0	7	35.2	0	0	0	0	0	0	0	19	0	0	0	0	0	0	0	0	0	0	0	0	0	0	0	0	0
33A1	3	EPP Analamiranga	2002-11-21	1	0	6	36.8	0	0	0	0	0	0	0	16	0	0	0	0	0	0	0	0	0	0	0	0	0	0	0	0	0
34A1	3	EPP Analamiranga	2002-11-21	1	0	8	37.1	1	0	0	0	0	0	0	18	0	0	0	0	0	0	0	0	0	0	0	0	0	0	0	0	0
35A1	3	EPP Analamiranga	2002-11-21	1	0	7	35.9	0	0	0	0	0	0	2	14	0	0	0	0	0	0	0	0	0	0	0	0	0	0	0	0	0
36A1	3	EPP Analamiranga	2002-11-21	1	0	7	37.3	1	0	0	0	0	0	0	18	0	0	0	0	0	0	0	0	0	0	0	0	0	0	0	0	0
37A1	3	EPP Analamiranga	2002-11-21	1	0	6	36.9	0	0	0	0	0	0	0	16	0	0	0	0	0	0	0	0	0	0	0	0	0	0	0	0	0
38A1	3	EPP Analamiranga	2002-11-21	1	0	8	36.2	0	0	0	0	0	0	0	19	0	0	0	0	0	0	0	0	0	0	0	0	0	0	0	0	0
39A1	3	EPP Analamiranga	2002-11-21	1	0	10	36.5	0	0	0	0	0	0	0	24	0	0	0	0	0	0	0	0	0	0	0	0	0	0	0	0	0
40A1	3	EPP Analamiranga	2002-11-21	1	0	8	36.8	0	0	0	0	0	0	0	23	0	0	0	0	0	0	0	0	0	0	0	0	0	0	0	0	0
41A1	3	EPP Analamiranga	2002-11-21	1	1	6	36.8	0	0	0	0	0	0	0	17	0	0	0	0	0	0	0	0	0	0	0	0	0	0	0	0	0
42A1	3	EPP Analamiranga	2002-11-21	1	1	7	36.9	0	0	0	0	0	0	0	18	0	0	0	0	0	0	0	0	0	0	0	0	0	0	0	0	0
43A1	3	EPP Analamiranga	2002-11-21	1	1	6	36.8	0	0	0	0	0	0	0	19	0	0	0	0	0	0	0	0	0	0	0	0	0	0	0	0	0
44A1	3	EPP Analamiranga	2002-11-21	1	1	8	36.6	0	0	0	0	0	0	0	18	0	0	0	0	0	0	0	0	0	0	0	0	0	0	0	0	0
45A1	3	EPP Analamiranga	2002-11-21	1	1	8	36.7	0	0	0	0	0	0	0	20	0	0	0	0	0	0	0	0	0	0	0	0	0	0	0	0	0
46A1	3	EPP Analamiranga	2002-11-21	1	1	10	36.3	0	0	0	0	0	0	0	25	0	0	0	0	0	0	0	0	0	0	0	0	0	0	0	0	0
47A1	3	EPP Analamiranga	2002-11-21	1	1	7	36.6	0	0	0	0	0	0	0	19	0	0	0	0	0	0	0	0	0	0	0	0	0	0	0	0	0
48A1	3	EPP Analamiranga	2002-11-21	1	1	7	35.4	0	0	0	0	0	0	0	18	0	0	0	0	0	0	0	0	0	0	0	0	0	0	0	0	0
49A1	3	EPP Analamiranga	2002-11-21	1	1	9	37.2	1	0	0	0	0	0	0	22	0	0	0	0	0	0	0	0	0	0	0	0	0	0	0	0	0
50A1	3	EPP Analamiranga	2002-11-21	1	1	8	36.1	0	0	0	0	0	0	0	21	0	0	0	0	0	0	0	0	0	0	0	0	0	0	0	0	0
51A1	3	EPP Analamiranga	2002-11-21	1	1	6	36	0	0	0	0	0	0	0	20	0	0	0	0	0	0	0	0	0	0	0	0	0	0	0	0	0
52A1	3	EPP Analamiranga	2002-11-21	1	1	8	36.6	0	0	0	0	0	0	0	19	0	0	0	0	0	0	0	0	0	0	0	0	0	0	0	0	0
53A1	3	EPP Analamiranga	2002-11-21	1	1	6	36.7	0	0	0	0	0	0	0	17	0	0	0	0	0	0	0	0	0	0	0	0	0	0	0	0	0
54A1	3	EPP Analamiranga	2002-11-21	1	1	8	35.8	0	0	0	0	0	0	0	27	0	0	0	0	0	0	0	0	0	0	0	0	0	0	0	0	0
55A1	3	EPP Analamiranga	2002-11-21	1	1	11	37.2	1	0	0	0	0	0	0	23	0	0	0	0	0	0	0	0	0	0	0	0	0	0	0	0	0
56A1	3	EPP Analamiranga	2002-11-21	1	0	10	35.6	0	0	0	0	0	0	0	25	0	0	0	0	0	0	0	0	0	0	0	0	0	0	0	0	0
57A1	3	EPP Analamiranga	2002-11-21	1	0	9	36.2	0	0	0	0	0	0	0	21	1	880	0	0	0	0	0	0	0	0	0	0	0	0	0	0	1
58A1	3	EPP Analamiranga	2002-11-21	1	0	7	37.1	1	0	0	0	0	0	0	19	0	0	0	0	0	0	0	0	0	0	0	0	0	0	0	0	0
59A1	3	EPP Analamiranga	2002-11-21	1	0	9	36	0	0	0	0	0	0	0	18	0	0	0	0	0	0	0	0	0	0	0	0	0	0	0	0	0
60A1	3	EPP Analamiranga	2002-11-21	1	0	7	35.9	0	0	0	0	0	0	0	18	0	0	0	0	0	0	0	0	0	0	0	0	1	2250	0	0	1
61A1	3	EPP Analamiranga	2002-11-21	1	0	7	36.4	0	0	0	0	0	0	0	16	0	0	0	0	0	0	0	0	0	0	0	0	0	0	0	0	0
62A1	3	EPP Analamiranga	2002-11-21	1	0	7	36.1	0	0	0	0	0	0	0	17	0	0	0	0	0	0	0	0	0	0	0	0	0	0	0	0	0
63A1	3	EPP Analamiranga	2002-11-21	1	0	6	36.2	0	0	0	0	0	0	0	16	0	0	0	0	0	0	0	0	0	0	0	0	0	0	0	0	0
65A1	3	EPP Analamiranga	2002-11-21	1	0	11	36.2	0	0	0	0	0	0	0	33	0	0	0	0	0	0	0	0	0	0	0	0	0	0	0	0	0
66A1	3	EPP Analamiranga	2002-11-21	1	0	11	36.1	0	0	0	0	0	0	0	26	0	0	0	0	0	0	0	0	0	0	0	0	0	0	0	0	0
67A1	3	EPP Analamiranga	2002-11-21	1	0	8	36.5	0	0	0	0	0	0	0	22	0	0	0	0	0	0	0	0	0	0	0	0	0	0	0	0	0
68A1	3	EPP Analamiranga	2002-11-21	1	0	12	36.7	0	0	0	0	0	0	0	34	0	0	0	0	0	0	0	0	0	0	0	0	0	0	0	0	0
69A1	3	EPP Analamiranga	2002-11-21	1	0	11	37.2	1	0	0	0	0	0	0	21	0	0	0	0	0	0	0	0	0	0	0	0	0	0	0	0	0
70A1	3	EPP Analamiranga	2002-11-21	1	1	10	35.6	0	0	0	0	0	0	0	20	0	0	0	0	0	0	0	0	0	0	0	0	1	1360	0	0	1
71A1	3	EPP Analamiranga	2002-11-21	1	1	12	35.8	0	0	0	0	0	0	0	21	0	0	0	0	1	880	0	0	0	0	0	0	0	0	0	0	1
72A1	3	EPP Analamiranga	2002-11-21	1	1	9	37.3	1	0	0	0	0	0	0	19	0	0	0	0	0	0	0	0	0	0	0	0	0	0	0	0	0
73A1	3	EPP Analamiranga	2002-11-21	1	0	9	37.4	1	0	0	0	0	0	0	25	0	0	0	0	0	0	0	0	0	0	0	0	0	0	0	0	0
74A1	3	EPP Analamiranga	2002-11-21	1	0	12	37.2	1	0	0	0	0	0	0	20	0	0	0	0	0	0	0	0	0	0	0	0	0	0	0	0	0
75A1	3	EPP Analamiranga	2002-11-21	1	0	9	37.6	1	0	0	0	1	1	0	34	0	0	0	0	0	0	0	0	0	0	0	0	1	32	1	48	1
76A1	3	EPP Analamiranga	2002-11-21	1	0	12	36.8	0	0	0	0	0	0	0	34	0	0	0	0	0	0	0	0	0	0	0	0	0	0	0	0	0
77A1	3	EPP Analamiranga	2002-11-21	1	0	9	35.5	0	0	0	0	0	0	0	21	1	200	0	0	0	0	0	0	0	0	0	0	0	0	0	0	1
78A1	3	EPP Analamiranga	2002-11-21	1	0	6	37	1	1	0	0	0	1	0	17	1	1000	0	0	0	0	0	0	0	0	0	0	0	0	0	0	1
79A1	3	EPP Analamiranga	2002-11-21	1	0	8	36.3	0	0	0	0	0	0	0	32	0	0	0	0	0	0	0	0	0	0	0	0	0	0	0	0	0
80A1	3	EPP Analamiranga	2002-11-21	1	0	6	37.6	1	0	0	0	0	0	2	16	0	0	0	0	0	0	0	0	0	0	0	0	0	0	0	0	0
81A1	3	EPP Analamiranga	2002-11-21	1	1	11	37.6	1	0	0	0	0	0	0	24	0	0	0	0	0	0	0	0	0	0	0	0	0	0	0	0	0
82A1	3	EPP Analamiranga	2002-11-21	1	1	10	37.2	1	0	0	0	0	0	0	26	0	0	0	0	0	0	0	0	0	0	0	0	0	0	0	0	0
83A1	3	EPP Analamiranga	2002-11-21	1	1	10	36.4	0	0	0	0	0	0	0	25	0	0	0	0	0	0	0	0	0	0	0	0	0	0	0	0	0
84A1	3	EPP Analamiranga	2002-11-21	1	1	9	36.6	0	0	0	0	0	0	0	24	0	0	0	0	0	0	0	0	0	0	0	0	0	0	0	0	0
85A1	3	EPP Analamiranga	2002-11-21	1	1	6	36.7	0	0	0	0	0	0	0	14	0	0	0	0	0	0	0	0	0	0	0	0	0	0	0	0	0
86A1	3	Ste Therese Analamiranga	2002-11-21	1	1	7	37	1	0	0	0	0	0	0	20	0	0	0	0	0	0	0	0	0	0	0	0	0	0	0	0	0
88A1	3	Ste Therese Analamiranga	2002-11-21	1	1	6	36.5	0	0	0	0	0	0	0	15	0	0	0	0	0	0	0	0	0	0	0	0	0	0	0	0	0
89A1	3	Ste Therese Analamiranga	2002-11-21	1	1	6	36.9	0	0	0	0	0	0	0	18	0	0	0	0	0	0	0	0	0	0	0	0	0	0	0	0	0
90A1	3	Ste Therese Analamiranga	2002-11-21	1	1	7	36.2	0	0	0	0	0	0	0	22	0	0	0	0	0	0	0	0	0	0	0	0	0	0	0	0	0
91A1	3	Ste Therese Analamiranga	2002-11-21	1	1	7	35.6	0	0	0	0	0	0	0	16	0	0	0	0	0	0	0	0	0	0	0	0	0	0	0	0	0
92A1	3	Ste Therese Analamiranga	2002-11-21	1	1	7	37.6	1	0	0	0	0	0	0	17	0	0	0	0	0	0	0	0	0	0	0	0	0	0	0	0	0
93A1	3	Ste Therese Analamiranga	2002-11-21	1	1	7	36.9	0	0	0	0	0	0	0	18	0	0	0	0	0	0	0	0	0	0	0	0	0	0	0	0	0
94A1	3	Ste Therese Analamiranga	2002-11-21	1	1	8	36.4	0	0	0	0	0	0	0	17	0	0	0	0	0	0	0	0	0	0	0	0	0	0	0	0	0
95A1	3	Ste Therese Analamiranga	2002-11-21	1	1	7	36.8	0	0	0	0	0	0	0	18	0	0	0	0	0	0	0	0	0	0	0	0	0	0	0	0	0
96A1	3	Ste Therese Analamiranga	2002-11-21	1	1	9	36.2	0	0	0	0	0	0	0	21	0	0	0	0	0	0	0	0	0	0	0	0	0	0	0	0	0
97A1	3	Ste Therese Analamiranga	2002-11-21	1	1	7	37.5	1	0	0	0	0	0	0	21	0	0	0	0	0	0	0	0	0	0	0	0	0	0	0	0	0
98A1	3	Ste Therese Analamiranga	2002-11-21	1	1	10	36.2	0	0	0	0	0	0	2	24	0	0	0	0	1	1520	0	0	0	0	0	0	0	0	0	0	1
99A1	3	Ste Therese Analamiranga	2002-11-21	1	1	8	36.9	0	0	0	0	0	0	0	33	0	0	0	0	0	0	0	0	0	0	0	0	0	0	0	0	0
100A1	3	Ste Therese Analamiranga	2002-11-21	1	1	8	37.2	1	0	0	0	0	0	0	23	0	0	0	0	0	0	0	0	0	0	0	0	0	0	0	0	0
101A1	3	Ste Therese Analamiranga	2002-11-21	1	1	7	36.9	0	0	0	0	0	0	0	17	0	0	0	0	0	0	0	0	0	0	0	0	0	0	0	0	0
102A1	3	Ste Therese Analamiranga	2002-11-21	1	1	7	36.3	0	0	0	0	0	0	0	16	0	0	0	0	0	0	0	0	0	0	0	0	0	0	0	0	0
103A1	3	Ste Therese Analamiranga	2002-11-21	1	1	10	37.2	1	0	0	0	0	0	0	20	0	0	0	0	0	0	0	0	0	0	0	0	0	0	0	0	0
104A1	3	Ste Therese Analamiranga	2002-11-21	1	1	10	37	1	0	0	0	0	0	2	18	0	0	0	0	0	0	0	0	0	0	0	0	0	0	0	0	0
105A1	3	Ste Therese Analamiranga	2002-11-21	1	1	7	37	1	0	0	0	0	0	0	22	0	0	0	0	0	0	0	0	0	0	0	0	0	0	0	0	0
106A1	3	Ste Therese Analamiranga	2002-11-21	1	1	6	37.4	1	0	0	0	0	0	0	19	0	0	0	0	0	0	0	0	0	0	0	0	0	0	0	0	0
107A1	3	Ste Therese Analamiranga	2002-11-21	1	1	7	37	1	0	0	0	0	0	0	23	0	0	0	0	0	0	0	0	0	0	0	0	0	0	0	0	0
108A1	3	Ste Therese Analamiranga	2002-11-21	1	1	6	36.9	0	0	0	0	0	0	0	15	0	0	0	0	0	0	0	0	0	0	0	0	0	0	0	0	0
109A1	3	Ste Therese Analamiranga	2002-11-21	1	1	6	36.7	0	0	0	0	0	0	0	20	0	0	0	0	0	0	0	0	0	0	0	0	0	0	0	0	0
110A1	3	Ste Therese Analamiranga	2002-11-21	1	1	12	36.8	0	0	0	0	0	0	0	24	1	500	0	0	0	0	0	0	0	0	0	0	0	0	0	0	1
111A1	3	Ste Therese Analamiranga	2002-11-21	1	1	7	36.8	0	0	0	0	0	0	0	17	0	0	0	0	0	0	0	0	0	0	0	0	0	0	0	0	0
112A1	3	Ste Therese Analamiranga	2002-11-21	1	0	7	36.7	0	0	0	0	0	0	0	19	0	0	0	0	0	0	0	0	0	0	0	0	0	0	0	0	0
113A1	3	Ste Therese Analamiranga	2002-11-21	1	0	7	36.8	0	0	0	0	0	0	0	17	1	840	0	0	0	0	0	0	0	0	0	0	0	0	0	0	1
114A1	3	Ste Therese Analamiranga	2002-11-21	1	0	8	36.4	0	0	0	0	0	0	2	20	0	0	0	0	0	0	0	0	0	0	0	0	0	0	0	0	0
115A1	3	Ste Therese Analamiranga	2002-11-21	1	0	7	36.6	0	0	0	0	0	0	0	18	1	1120	0	0	0	0	0	0	0	0	0	0	0	0	0	0	1
116A1	3	Ste Therese Analamiranga	2002-11-21	1	0	6	37.2	1	0	0	0	0	0	0	16	0	0	0	0	0	0	0	0	0	0	0	0	0	0	0	0	0
117A1	3	Ste Therese Analamiranga	2002-11-21	1	0	7	36.2	0	0	0	0	0	0	2	18	0	0	0	0	0	0	0	0	0	0	0	0	1	109	0	0	1
118A1	3	Ste Therese Analamiranga	2002-11-21	1	0	9	36.4	0	0	0	0	0	0	2	20	0	0	0	0	0	0	0	0	0	0	0	0	0	0	0	0	0
119A1	3	Ste Therese Analamiranga	2002-11-21	1	0	7	36.8	0	0	0	0	0	0	2	16	0	0	0	0	0	0	0	0	0	0	0	0	0	0	0	0	0
120A1	3	Ste Therese Analamiranga	2002-11-21	1	0	6	36.4	0	0	0	0	0	0	2	15	0	0	0	0	0	0	0	0	0	0	0	0	0	0	0	0	0
121A1	3	Ste Therese Analamiranga	2002-11-21	1	0	7	37.3	1	0	0	0	0	0	0	18	0	0	0	0	0	0	0	0	0	0	0	0	0	0	0	0	0
122A1	3	Ste Therese Analamiranga	2002-11-21	1	0	7	37.4	1	0	0	0	0	0	0	18	0	0	0	0	0	0	0	0	0	0	0	0	0	0	0	0	0
123A1	3	Ste Therese Analamiranga	2002-11-21	1	0	8	37.1	1	1	0	0	0	1	0	17	1	2000	0	0	0	0	0	0	0	0	0	0	0	0	0	0	1
124A1	3	Ste Therese Analamiranga	2002-11-21	1	0	7	37	1	1	0	0	0	1	0	20	1	620	0	0	0	0	0	0	0	0	0	0	0	0	0	0	1
125A1	3	Ste Therese Analamiranga	2002-11-21	1	0	8	37.5	1	0	0	0	0	0	0	25	0	0	0	0	0	0	0	0	0	0	0	0	0	0	0	0	0
126A1	3	Ste Therese Analamiranga	2002-11-21	1	0	8	36.4	0	0	0	0	0	0	0	21	1	2000	0	0	0	0	0	0	0	0	0	0	1	2000	0	0	1
127A1	3	Ste Therese Analamiranga	2002-11-21	1	0	9	37.1	1	1	0	0	0	1	0	22	1	960	0	0	0	0	0	0	0	0	0	0	0	0	0	0	1
128A1	3	Ste Therese Analamiranga	2002-11-21	1	0	7	37.7	1	0	0	0	1	1	0	15	0	0	0	0	0	0	0	0	0	0	0	0	1	5000	1	16	1
129A1	3	Ste Therese Analamiranga	2002-11-21	1	0	6	36.9	0	0	0	0	0	0	0	16	1	1250	0	0	0	0	0	0	0	0	0	0	0	0	0	0	1
130A1	3	Ste Therese Analamiranga	2002-11-21	1	0	6	36.6	0	0	0	0	0	0	0	13	0	0	0	0	0	0	0	0	0	0	0	0	0	0	0	0	0
131A1	3	Ste Therese Analamiranga	2002-11-21	1	0	6	36.4	0	0	0	0	0	0	0	15	0	0	0	0	0	0	0	0	0	0	0	0	0	0	0	0	0
132A1	3	Ste Therese Analamiranga	2002-11-21	1	0	9	37.4	1	0	0	0	0	0	0	21	0	0	0	0	0	0	0	0	0	0	0	0	0	0	0	0	0
133A1	3	Ste Therese Analamiranga	2002-11-21	1	0	6	36.9	0	0	0	0	0	0	0	18	0	0	0	0	0	0	0	0	0	0	0	0	0	0	0	0	0
134A1	3	Ste Therese Analamiranga	2002-11-21	1	0	10	36.2	0	0	0	0	0	0	0	25	1	500	0	0	0	0	0	0	0	0	0	0	0	0	0	0	1
135A1	3	Ste Therese Analamiranga	2002-11-21	1	1	7	36.2	0	0	0	0	0	0	0	19	0	0	0	0	0	0	0	0	0	0	0	0	0	0	0	0	0
136A1	3	Ste Therese Analamiranga	2002-11-21	1	0	8	36.5	0	0	0	0	0	0	0	21	1	1040	1	16	0	0	0	0	0	0	0	0	0	0	0	0	1
137A1	3	Ste Therese Analamiranga	2002-11-21	1	0	8	36.2	0	0	0	0	0	0	0	18	0	0	0	0	0	0	0	0	0	0	0	0	0	0	0	0	0
138A1	3	Ste Therese Analamiranga	2002-11-21	1	0	8	36.5	0	0	0	0	0	0	2	20	1	640	0	0	0	0	0	0	0	0	0	0	0	0	0	0	1
139A1	3	Ste Therese Analamiranga	2002-11-21	1	0	6	37.3	1	0	0	0	0	0	0	16	0	0	0	0	0	0	0	0	0	0	0	0	0	0	0	0	0
140A1	3	Ste Therese Analamiranga	2002-11-21	1	0	7	37.7	1	0	0	0	0	0	0	15	0	0	0	0	0	0	0	0	0	0	0	0	0	0	0	0	0
141A1	3	Ste Therese Analamiranga	2002-11-21	1	1	7	36.9	0	0	0	0	0	0	0	18	0	0	0	0	0	0	0	0	0	0	0	0	0	0	0	0	0
142A1	3	Ste Therese Analamiranga	2002-11-21	1	1	7	36.7	0	0	0	0	0	0	0	16	0	0	0	0	0	0	0	0	0	0	0	0	0	0	0	0	0
143A1	3	Ste Therese Analamiranga	2002-11-21	1	1	7	38.7	1	0	0	0	0	0	2	18	0	0	0	0	0	0	0	0	0	0	0	0	0	0	0	0	0
144A1	3	Ste Therese Analamiranga	2002-11-21	1	1	10	36.7	0	0	0	0	0	0	0	23	0	0	0	0	0	0	0	0	0	0	0	0	0	0	0	0	0
145A1	3	Ste Therese Analamiranga	2002-11-21	1	1	11	37.3	1	0	0	0	0	0	0	21	0	0	0	0	0	0	0	0	0	0	0	0	0	0	0	0	0
146A1	3	Ste Therese Analamiranga	2002-11-21	1	1	11	36.4	0	0	0	0	0	0	0	25	0	0	0	0	0	0	0	0	0	0	0	0	0	0	0	0	0
147A1	3	Ste Therese Analamiranga	2002-11-21	1	1	12	36.2	0	0	0	0	0	0	0	28	0	0	0	0	0	0	0	0	0	0	0	0	0	0	0	0	0
148A1	3	Ste Therese Analamiranga	2002-11-21	1	1	12	36.9	0	0	0	0	0	0	2	24	1	16	0	0	0	0	0	0	0	0	0	0	0	0	0	0	1
149A1	3	Ste Therese Analamiranga	2002-11-21	1	1	11	36.3	0	0	0	0	0	0	0	24	1	750	0	0	0	0	0	0	0	0	0	0	0	0	0	0	1
150A1	3	Ste Therese Analamiranga	2002-11-21	1	1	8	36.8	0	0	0	0	0	0	0	19	0	0	0	0	0	0	0	0	0	0	0	0	0	0	0	0	0
151A1	3	Ste Therese Analamiranga	2002-11-21	1	1	12	36.7	0	0	0	0	0	0	0	26	0	0	0	0	0	0	0	0	0	0	0	0	0	0	0	0	0
152A1	3	Ste Therese Analamiranga	2002-11-21	1	1	9	36.9	0	0	0	0	0	0	0	19	0	0	0	0	0	0	0	0	0	0	0	0	1	61	0	0	1
153A1	3	Ste Therese Analamiranga	2002-11-21	1	0	10	36.4	0	0	0	0	0	0	0	24	0	0	0	0	0	0	0	0	0	0	0	0	0	0	0	0	0
154A1	3	Ste Therese Analamiranga	2002-11-21	1	0	11	37.1	1	1	0	0	0	1	0	19	1	298	0	0	0	0	0	0	0	0	0	0	0	0	0	0	1
155A1	3	Ste Therese Analamiranga	2002-11-21	1	0	10	36.6	0	0	0	0	0	0	0	21	0	0	0	0	0	0	0	0	0	0	0	0	0	0	0	0	0
156A1	3	Ste Therese Analamiranga	2002-11-21	1	0	10	36.8	0	0	0	0	0	0	2	24	1	750	0	0	0	0	0	0	0	0	0	0	0	0	0	0	1
157A1	3	Ste Therese Analamiranga	2002-11-21	1	0	10	36.6	0	0	0	0	0	0	0	29	0	0	0	0	0	0	0	0	0	0	0	0	0	0	0	0	0
158A1	3	Ste Therese Analamiranga	2002-11-21	1	0	12	37	1	0	0	0	0	0	0	25	0	0	0	0	0	0	0	0	0	0	0	0	0	0	0	0	0
159A1	3	Ste Therese Analamiranga	2002-11-21	1	0	9	37.2	1	0	0	0	0	0	0	20	0	0	0	0	0	0	0	0	0	0	0	0	0	0	0	0	0
160A1	3	Ste Therese Analamiranga	2002-11-21	1	0	9	36.5	0	0	0	0	0	0	0	23	1	500	0	0	0	0	0	0	0	0	0	0	0	0	0	0	1
161A1	3	Ste Therese Analamiranga	2002-11-21	1	0	10	37	1	1	0	0	0	1	0	22	1	3000	0	0	0	0	0	0	0	0	0	0	0	0	0	0	1
162A1	3	Ste Therese Analamiranga	2002-11-21	1	0	7	37.6	1	1	0	0	0	1	0	17	1	382	0	0	0	0	0	0	0	0	0	0	0	0	0	0	1
163A1	3	Ste Therese Analamiranga	2002-11-21	1	0	11	37.1	1	0	0	0	0	0	0	24	0	0	0	0	0	0	0	0	0	0	0	0	0	0	0	0	0
164A1	3	Ste Therese Analamiranga	2002-11-21	1	0	10	36.4	0	0	0	0	0	0	0	25	1	438	0	0	0	0	0	0	0	0	0	0	0	0	0	0	1
165A1	3	Ste Therese Analamiranga	2002-11-21	1	0	8	36.2	0	0	0	0	0	0	0	24	0	0	0	0	0	0	0	0	0	0	0	0	0	0	0	0	0
166A1	3	Ste Therese Analamiranga	2002-11-21	1	0	11	36.6	0	0	0	0	0	0	0	27	0	0	0	0	0	0	0	0	0	0	0	0	0	0	0	0	0
167A1	3	Ste Therese Analamiranga	2002-11-21	1	0	9	37.2	1	1	0	0	0	1	2	24	1	1440	0	0	0	0	0	0	0	0	0	0	0	0	0	0	1
168A1	3	Ste Therese Analamiranga	2002-11-21	1	1	12	36.2	0	0	0	0	0	0	0	29	1	670	0	0	0	0	0	0	0	0	0	0	0	0	0	0	1
169A1	3	Ste Therese Analamiranga	2002-11-21	1	1	12	36.9	0	0	0	0	0	0	0	30	0	0	0	0	0	0	0	0	0	0	0	0	0	0	0	0	0
170A1	3	Ste Therese Analamiranga	2002-11-21	1	1	12	36.2	0	0	0	0	0	0	0	27	0	0	0	0	0	0	0	0	0	0	0	0	0	0	0	0	0
171A1	3	Ste Therese Analamiranga	2002-11-21	1	1	10	36.2	0	0	0	0	0	0	0	23	0	0	0	0	0	0	0	0	0	0	0	0	0	0	0	0	0
172A1	3	Ste Therese Analamiranga	2002-11-21	1	0	12	36.6	0	0	0	0	0	0	0	28	0	0	0	0	0	0	0	0	0	0	0	0	0	0	0	0	0
173A1	3	Ste Therese Analamiranga	2002-11-21	1	0	12	36.8	0	0	0	0	0	0	0	20	0	0	0	0	0	0	0	0	0	0	0	0	0	0	0	0	0
174A1	3	Ste Therese Analamiranga	2002-11-21	1	0	12	36.5	0	0	0	0	0	0	2	32	0	0	0	0	0	0	0	0	0	0	0	0	0	0	0	0	0
175A1	3	Ste Therese Analamiranga	2002-11-21	1	0	12	36.8	0	0	0	0	0	0	0	27	0	0	0	0	0	0	0	0	0	0	0	0	0	0	0	0	0
176A1	3	Ste Therese Analamiranga	2002-11-21	1	0	10	36.4	0	0	0	0	0	0	0	23	0	0	0	0	0	0	0	0	0	0	0	0	0	0	0	0	0
177A1	3	Ste Therese Analamiranga	2002-11-21	1	1	12	37.2	1	0	0	0	0	0	0	24	0	0	0	0	0	0	0	0	0	0	0	0	0	0	0	0	0
178A1	3	EPP Ampasipotsy	2002-11-21	1	1	8	37.8	1	1	0	0	0	1	2	19	1	440	0	0	0	0	0	0	0	0	0	0	0	0	0	0	1
179A1	3	EPP Ampasipotsy	2002-11-21	1	1	7	37.2	1	0	0	0	0	0	0	29	0	0	0	0	0	0	0	0	0	0	0	0	0	0	0	0	0
180A1	3	EPP Ampasipotsy	2002-11-21	1	0	7	38.2	1	1	0	0	0	1	0	21	1	1756	0	0	0	0	0	0	0	0	0	0	0	0	0	0	1
181A1	3	EPP Ampasipotsy	2002-11-21	1	1	6	37.1	1	1	0	0	0	1	0	21	1	1000	0	0	0	0	0	0	0	0	0	0	0	0	0	0	1
182A1	3	EPP Ampasipotsy	2002-11-21	1	1	8	38	1	1	0	0	0	1	0	20	1	1160	0	0	0	0	0	0	0	0	0	0	0	0	0	0	1
183A1	3	EPP Ampasipotsy	2002-11-21	1	1	6	37	1	1	0	0	0	1	0	18	1	80	0	0	0	0	0	0	0	0	0	0	0	0	0	0	1
184A1	3	EPP Ampasipotsy	2002-11-21	1	0	7	37.2	1	1	0	0	0	1	0	16	1	520	0	0	0	0	0	0	0	0	0	0	0	0	0	0	1
185A1	3	EPP Ampasipotsy	2002-11-21	1	0	7	37.3	1	0	0	0	0	0	0	20	0	0	0	0	0	0	0	0	0	0	0	0	0	0	0	0	0
186A1	3	EPP Ampasipotsy	2002-11-21	1	1	8	38	1	0	0	0	0	0	2	21	0	0	0	0	0	0	0	0	0	0	0	0	0	0	0	0	0
187A1	3	EPP Ampasipotsy	2002-11-21	1	0	8	37.2	1	1	0	0	0	1	0	20	1	120	0	0	0	0	0	0	0	0	0	0	0	0	0	0	1
188A1	3	EPP Ampasipotsy	2002-11-21	1	0	11	37.5	1	1	0	0	0	1	0	25	1	2250	0	0	0	0	0	0	0	0	0	0	0	0	0	0	1
189A1	3	EPP Ampasipotsy	2002-11-21	1	0	10	37.3	1	1	0	0	0	1	2	24	1	680	0	0	0	0	0	0	0	0	0	0	0	0	0	0	1
190A1	3	EPP Ampasipotsy	2002-11-21	1	0	8	37.5	1	0	0	0	0	0	0	21	0	0	0	0	0	0	0	0	0	0	0	0	0	0	0	0	0
191A1	3	EPP Ampasipotsy	2002-11-21	1	0	11	37.7	1	0	1	0	0	1	2	28	0	0	0	0	1	207	0	0	0	0	0	0	0	0	0	0	1
192A1	3	EPP Ampasipotsy	2002-11-21	1	0	11	37.7	1	0	0	0	0	0	2	24	0	0	0	0	0	0	0	0	0	0	0	0	0	0	0	0	0
193A1	3	EPP Ampasipotsy	2002-11-21	1	1	10	37.2	1	1	0	0	0	1	0	27	1	1320	0	0	0	0	0	0	0	0	0	0	0	0	0	0	1
194A1	3	EPP Ampasipotsy	2002-11-21	1	1	8	37	1	1	0	0	0	1	0	20	1	2962	0	0	0	0	0	0	0	0	0	0	0	0	0	0	1
195A1	3	EPP Ampasipotsy	2002-11-21	1	0	10	37.1	1	0	0	0	0	0	0	22	0	0	0	0	0	0	0	0	0	0	0	0	0	0	0	0	0
196A1	3	EPP Ampasipotsy	2002-11-21	1	1	10	37.2	1	0	0	0	0	0	0	22	0	0	0	0	0	0	0	0	0	0	0	0	0	0	0	0	0
197A1	3	EPP Ampasipotsy	2002-11-21	1	1	11	37.3	1	0	0	0	0	0	0	28	0	0	0	0	0	0	0	0	0	0	0	0	0	0	0	0	0
198A1	3	EPP Ampasipotsy	2002-11-21	1	1	11	37.5	1	0	0	0	0	0	2	22	0	0	0	0	0	0	0	0	0	0	0	0	0	0	0	0	0
199A1	3	EPP Ampasipotsy	2002-11-21	1	1	10	37.3	1	0	0	0	0	0	3	24	0	0	0	0	0	0	0	0	0	0	0	0	0	0	0	0	0
200A1	3	EPP Ampasipotsy	2002-11-21	1	1	10	37.1	1	1	0	0	0	1	0	25	1	1120	0	0	0	0	0	0	0	0	0	0	0	0	0	0	1
201A1	3	EPP Ampasipotsy	2002-11-21	1	1	10	37.5	1	1	0	0	0	1	0	23	1	136	0	0	0	0	0	0	0	0	0	0	0	0	0	0	1
202A1	3	EPP Ampasipotsy	2002-11-21	1	1	12	37.9	1	0	0	0	0	0	3	27	0	0	0	0	0	0	0	0	0	0	0	0	0	0	0	0	0
203A1	3	EPP Ampasipotsy	2002-11-21	1	1	11	37.4	1	1	0	0	0	1	0	23	1	1717	0	0	0	0	0	0	0	0	0	0	0	0	0	0	1
204A1	3	EPP Ampasipotsy	2002-11-21	1	0	10	38	1	0	0	0	0	0	0	20	0	0	0	0	0	0	0	0	0	0	0	0	0	0	0	0	0
205A1	3	EPP Ampasipotsy	2002-11-21	1	0	10	37.4	1	0	0	0	0	0	2	26	0	0	0	0	0	0	0	0	0	0	0	0	0	0	0	0	0
206A1	3	EPP Ampasipotsy	2002-11-21	1	0	10	37.6	1	0	0	0	0	0	0	26	0	0	0	0	0	0	0	0	0	0	0	0	0	0	0	0	0
207A1	3	EPP Ampasipotsy	2002-11-21	1	0	11	37.6	1	0	0	0	0	0	0	29	0	0	0	0	0	0	0	0	0	0	0	0	0	0	0	0	0
208A1	3	EPP Ampasipotsy	2002-11-21	1	1	11	37.3	1	0	0	0	0	0	0	26	0	0	0	0	0	0	0	0	0	0	0	0	0	0	0	0	0
209A1	3	EPP Ampasipotsy	2002-11-21	1	0	11	37.7	1	1	0	0	0	1	0	27	1	360	1	16	0	0	0	0	0	0	0	0	0	0	0	0	1
210A1	3	EPP Ampasipotsy	2002-11-21	1	1	11	37.8	1	0	0	0	0	0	0	28	0	0	0	0	0	0	0	0	0	0	0	0	0	0	0	0	0
211A1	3	EPP Ampasipotsy	2002-11-21	1	1	10	37.6	1	0	0	0	0	0	0	28	0	0	0	0	0	0	0	0	0	0	0	0	0	0	0	0	0
212A1	3	EPP Ampasipotsy	2002-11-21	1	0	10	37.6	1	0	0	0	0	0	0	34	0	0	0	0	0	0	0	0	0	0	0	0	0	0	0	0	0
213A1	3	EPP Ampasipotsy	2002-11-21	1	0	10	37.2	1	1	0	0	0	1	0	25	1	47	0	0	0	0	0	0	0	0	0	0	0	0	0	0	1
214A1	3	EPP Ampasipotsy	2002-11-21	1	0	11	37.4	1	0	0	0	0	0	0	29	0	0	0	0	0	0	0	0	0	0	0	0	0	0	0	0	0
215A1	3	EPP Ampasipotsy	2002-11-21	1	0	11	37.8	1	1	0	0	0	1	2	29	1	400	0	0	0	0	0	0	0	0	0	0	0	0	0	0	1
216A1	3	EPP Ampasipotsy	2002-11-21	1	1	11	37.4	1	0	0	0	0	0	0	25	0	0	0	0	0	0	0	0	0	0	0	0	0	0	0	0	0
217A1	3	EPP Ampasipotsy	2002-11-21	1	1	11	37.8	1	0	0	0	0	0	0	26	0	0	0	0	0	0	0	0	0	0	0	0	0	0	0	0	0
218A1	3	EPP Ampasipotsy	2002-11-21	1	1	8	37.5	1	1	0	0	0	1	0	19	1	476	0	0	0	0	0	0	0	0	0	0	0	0	0	0	1
219A1	3	EPP Ampasipotsy	2002-11-21	1	1	12	37.4	1	0	0	0	0	0	0	29	0	0	0	0	0	0	0	0	0	0	0	0	0	0	0	0	0
220A1	3	EPP Ampasipotsy	2002-11-21	1	1	12	37.9	1	0	0	0	0	0	0	26	0	0	0	0	0	0	0	0	0	0	0	0	0	0	0	0	0
221A1	3	EPP Ampasipotsy	2002-11-21	1	1	10	37.3	1	0	0	0	0	0	0	25	0	0	0	0	0	0	0	0	0	0	0	0	0	0	0	0	0
222A1	3	EPP Ampasipotsy	2002-11-21	1	1	8	37.4	1	0	0	0	0	0	0	23	0	0	0	0	0	0	0	0	0	0	0	0	0	0	0	0	0
223A1	3	EPP Ampasipotsy	2002-11-21	1	1	12	37.7	1	0	0	0	0	0	2	29	0	0	0	0	0	0	0	0	0	0	0	0	0	0	0	0	0
224A1	3	EPP Ampasipotsy	2002-11-21	1	1	10	37.4	1	0	0	0	0	0	0	24	0	0	0	0	0	0	0	0	0	0	0	0	0	0	0	0	0
225A1	3	EPP Ampasipotsy	2002-11-21	1	0	11	37.5	1	0	0	0	0	0	0	26	0	0	0	0	0	0	0	0	0	0	0	0	0	0	0	0	0
1A2	3	EPP Analamiranga	2003-01-29	2	1	11	37.1	1	0	0	0	0	0	0	23	0	0	0	0	0	0	0	0	0	0	0	0	0	0	0	0	0
2A2	3	EPP Analamiranga	2003-01-29	2	1	11	37.2	1	0	0	0	0	0	0	26	0	0	0	0	0	0	0	0	0	0	0	0	0	0	0	0	0
3A2	3	EPP Analamiranga	2003-01-29	2	1	11	37.3	1	0	0	0	0	0	0	26	0	0	0	0	0	0	0	0	0	0	0	0	0	0	0	0	0
4A2	3	EPP Analamiranga	2003-01-29	2	1	12	36.7	0	0	0	0	0	0	0	30	0	0	0	0	0	0	0	0	0	0	0	0	0	0	0	0	0
5A2	3	EPP Analamiranga	2003-01-29	2	1	11	37.3	1	0	0	0	0	0	0	26	0	0	0	0	0	0	0	0	0	0	0	0	0	0	0	0	0
6A2	3	EPP Analamiranga	2003-01-29	2	0	12	36.3	0	0	0	0	0	0	0	31	0	0	0	0	0	0	0	0	0	0	0	0	0	0	0	0	0
7A2	3	EPP Analamiranga	2003-01-29	2	0	6	37.2	1	0	0	0	0	0	0	18	0	0	0	0	0	0	0	0	0	0	0	0	0	0	0	0	0
8A2	3	EPP Analamiranga	2003-01-29	2	0	11	36.8	0	0	0	0	0	0	0	25	0	0	0	0	0	0	0	0	0	0	0	0	0	0	0	0	0
9A2	3	EPP Analamiranga	2003-01-29	2	0	12	37.1	1	0	0	0	0	0	0	34	0	0	0	0	0	0	0	0	0	0	0	0	0	0	0	0	0
10A2	3	EPP Analamiranga	2003-01-29	2	0	10	36.6	0	0	0	0	0	0	0	22	0	0	0	0	0	0	0	0	0	0	0	0	0	0	0	0	0
11A2	3	EPP Analamiranga	2003-01-29	2	0	9	37.6	1	0	0	0	0	0	0	22	0	0	0	0	0	0	0	0	0	0	0	0	0	0	0	0	0
12A2	3	EPP Analamiranga	2003-01-29	2	0	9	37	1	0	0	0	0	0	0	22	0	0	0	0	0	0	0	0	0	0	0	0	0	0	0	0	0
13A2	3	EPP Analamiranga	2003-01-29	2	0	11	36.8	0	0	0	0	0	0	0	25	0	0	0	0	0	0	0	0	0	0	0	0	0	0	0	0	0
14A2	3	EPP Analamiranga	2003-01-29	2	0	9	36.8	0	0	0	0	0	0	0	19	0	0	0	0	0	0	0	0	0	0	0	0	0	0	0	0	0
15A2	3	EPP Analamiranga	2003-01-29	2	0	6	37.3	1	0	0	0	0	0	0	18	0	0	0	0	0	0	0	0	0	0	0	0	0	0	0	0	0
16A2	3	EPP Analamiranga	2003-01-29	2	0	11	36.6	0	0	0	0	0	0	0	19	0	0	0	0	0	0	0	0	0	0	0	0	0	0	0	0	0
17A2	3	EPP Analamiranga	2003-01-29	2	1	7	36.2	0	0	0	0	0	0	0	20	0	0	0	0	0	0	0	0	0	0	0	0	0	0	0	0	0
18A2	3	EPP Analamiranga	2003-01-29	2	1	11	37	1	0	0	0	0	0	0	22	0	0	0	0	0	0	0	0	0	0	0	0	0	0	0	0	0
19A2	3	EPP Analamiranga	2003-01-29	2	1	10	37.1	1	0	0	0	0	0	0	25	0	0	0	0	0	0	0	0	0	0	0	0	0	0	0	0	0
20A2	3	EPP Analamiranga	2003-01-29	2	1	11	37.1	1	0	0	0	0	0	0	25	0	0	0	0	0	0	0	0	0	0	0	0	0	0	0	0	0
21A2	3	EPP Analamiranga	2003-01-29	2	1	10	36.7	0	0	0	0	0	0	0	20	1	1242.71	0	0	0	0	0	0	0	0	0	0	0	0	0	0	1
22A2	3	EPP Analamiranga	2003-01-29	2	1	10	36.7	0	0	0	0	0	0	0	21	0	0	0	0	0	0	0	0	0	0	0	0	0	0	0	0	0
23A2	3	EPP Analamiranga	2003-01-29	2	0	12	36.3	0	0	0	0	0	0	0	34	0	0	0	0	0	0	0	0	0	0	0	0	0	0	0	0	0
24A2	3	EPP Analamiranga	2003-01-29	2	0	11	36.7	0	0	0	0	0	0	0	27	0	0	0	0	0	0	0	0	0	0	0	0	0	0	0	0	0
25A2	3	EPP Analamiranga	2003-01-29	2	0	9	36.9	0	0	0	0	0	0	0	22	1	96	0	0	0	0	0	0	0	0	0	0	0	0	0	0	1
26A2	3	EPP Analamiranga	2003-01-29	2	0	12	36	0	0	0	0	0	0	0	35	0	0	0	0	0	0	0	0	0	0	0	0	0	0	0	0	0
27A2	3	EPP Analamiranga	2003-01-29	2	1	9	36.8	0	0	0	0	0	0	0	20	0	0	0	0	0	0	0	0	0	0	0	0	0	0	0	0	0
28A2	3	EPP Analamiranga	2003-01-29	2	1	8	36.9	0	0	0	0	0	0	0	24	0	0	0	0	0	0	0	0	0	0	0	0	0	0	0	0	0
29A2	3	EPP Analamiranga	2003-01-29	2	0	6	37.7	1	0	0	0	0	0	0	13	0	0	0	0	0	0	0	0	0	0	0	0	0	0	0	0	0
30A2	3	EPP Analamiranga	2003-01-29	2	0	8	37.2	1	0	0	0	0	0	0	24	0	0	0	0	0	0	0	0	0	0	0	0	0	0	0	0	0
31A2	3	EPP Analamiranga	2003-01-29	2	0	7	37.3	1	0	0	0	0	0	0	15	0	0	0	0	0	0	0	0	0	0	0	0	0	0	0	0	0
32A2	3	EPP Analamiranga	2003-01-29	2	0	8	37.5	1	0	0	0	0	0	0	17	0	0	0	0	0	0	0	0	0	0	0	0	0	0	0	0	0
33A2	3	EPP Analamiranga	2003-01-29	2	0	7	36.7	0	0	0	0	0	0	0	18	0	0	0	0	0	0	0	0	0	0	0	0	0	0	0	0	0
34A2	3	EPP Analamiranga	2003-01-29	2	0	7	37.9	1	0	0	0	0	0	0	16	0	0	0	0	0	0	0	0	0	0	0	0	0	0	0	0	0
35A2	3	EPP Analamiranga	2003-01-29	2	0	7	37.1	1	0	0	0	0	0	0	16	0	0	0	0	0	0	0	0	0	0	0	0	0	0	0	0	0
36A2	3	EPP Analamiranga	2003-01-29	2	0	8	37.5	1	0	0	0	0	0	0	19	0	0	0	0	0	0	0	0	0	0	0	0	0	0	0	0	0
37A2	3	EPP Analamiranga	2003-01-29	2	0	8	37.3	1	0	0	0	0	0	0	15	0	0	0	0	0	0	0	0	0	0	0	0	0	0	0	0	0
38A2	3	EPP Analamiranga	2003-01-29	2	0	12	37.3	1	0	0	0	0	0	0	32	0	0	0	0	0	0	0	0	0	0	0	0	0	0	0	0	0
39A2	3	EPP Analamiranga	2003-01-29	2	0	9	36.7	0	0	0	0	0	0	0	20	0	0	0	0	0	0	0	0	0	0	0	0	0	0	0	0	0
40A2	3	EPP Analamiranga	2003-01-29	2	0	7	37.4	1	1	0	0	0	1	0	16	1	680	0	0	0	0	0	0	0	0	0	0	0	0	0	0	1
41A2	3	EPP Analamiranga	2003-01-29	2	0	7	37.6	1	0	0	0	0	0	0	15	0	0	0	0	0	0	0	0	0	0	0	0	0	0	0	0	0
42A2	3	EPP Analamiranga	2003-01-29	2	1	6	37.1	1	0	0	0	0	0	2	15	0	0	0	0	0	0	0	0	0	0	0	0	0	0	0	0	0
43A2	3	EPP Analamiranga	2003-01-29	2	1	6	37.1	1	0	0	0	0	0	0	18	0	0	0	0	0	0	0	0	0	0	0	0	0	0	0	0	0
44A2	3	EPP Analamiranga	2003-01-29	2	1	7	37.6	1	0	0	0	0	0	0	17	0	0	0	0	0	0	0	0	0	0	0	0	0	0	0	0	0
45A2	3	EPP Analamiranga	2003-01-29	2	1	6	36.7	0	0	0	0	0	0	0	18	1	960	0	0	0	0	0	0	0	0	0	0	0	0	0	0	1
46A2	3	EPP Analamiranga	2003-01-29	2	1	8	38.9	1	1	0	0	0	1	0	18	1	3450.98	0	0	0	0	0	0	0	0	0	0	0	0	0	0	1
47A2	3	EPP Analamiranga	2003-01-29	2	1	8	36.9	0	0	0	0	0	0	0	19	0	0	0	0	0	0	0	0	0	0	0	0	0	0	0	0	0
48A2	3	EPP Analamiranga	2003-01-29	2	1	10	38.3	1	1	0	0	0	1	0	23	1	71000	0	0	0	0	0	0	0	0	0	0	0	0	0	0	1
49A2	3	EPP Analamiranga	2003-01-29	2	1	7	37.3	1	0	0	0	0	0	0	18	0	0	0	0	0	0	0	0	0	0	0	0	0	0	0	0	0
50A2	3	EPP Analamiranga	2003-01-29	2	1	7	36.8	0	0	0	0	0	0	0	17	0	0	0	0	0	0	0	0	0	0	0	0	0	0	0	0	0
51A2	3	EPP Analamiranga	2003-01-29	2	1	9	36.9	0	0	0	0	0	0	0	20	0	0	0	0	0	0	0	0	0	0	0	0	0	0	0	0	0
52A2	3	EPP Analamiranga	2003-01-29	2	1	7	36.9	0	0	0	0	0	0	0	20	0	0	0	0	0	0	0	0	0	0	0	0	0	0	0	0	0
53A2	3	EPP Analamiranga	2003-01-29	2	1	6	36.6	0	0	0	0	0	0	0	20	0	0	0	0	0	0	0	0	0	0	0	0	0	0	0	0	0
54A2	3	EPP Analamiranga	2003-01-29	2	1	7	37.3	1	0	0	0	0	0	0	16	0	0	0	0	0	0	0	0	0	0	0	0	0	0	0	0	0
55A2	3	EPP Analamiranga	2003-01-29	2	1	10	36.7	0	0	0	0	0	0	0	24	0	0	0	0	0	0	0	0	0	0	0	0	0	0	0	0	0
56A2	3	EPP Analamiranga	2003-01-29	2	1	11	37.1	1	0	0	0	0	0	0	22	0	0	0	0	0	0	0	0	0	0	0	0	0	0	0	0	0
57A2	3	EPP Analamiranga	2003-01-29	2	0	10	36.3	0	0	0	0	0	0	0	25	0	0	0	0	0	0	0	0	0	0	0	0	0	0	0	0	0
58A2	3	EPP Analamiranga	2003-01-29	2	0	9	36.7	0	0	0	0	0	0	0	20	0	0	0	0	0	0	0	0	0	0	0	0	0	0	0	0	0
59A2	3	EPP Analamiranga	2003-01-29	2	0	7	36.6	0	0	0	0	0	0	0	16	0	0	0	0	0	0	0	0	0	0	0	0	0	0	0	0	0
60A2	3	EPP Analamiranga	2003-01-29	2	1	8	37	1	1	0	0	0	1	0	22	1	127.49	0	0	0	0	0	0	0	0	0	0	0	0	0	0	1
61A2	3	Ste Therese Analamiranga	2003-01-29	2	1	8	36.9	0	0	0	0	0	0	0	17	0	0	0	0	0	0	0	0	0	0	0	0	0	0	0	0	0
62A2	3	Ste Therese Analamiranga	2003-01-29	2	1	8	37	1	0	0	0	0	0	0	18	0	0	0	0	0	0	0	0	0	0	0	0	0	0	0	0	0
63A2	3	Ste Therese Analamiranga	2003-01-29	2	1	8	37.2	1	0	0	0	0	0	0	19	0	0	0	0	0	0	0	0	0	0	0	0	0	0	0	0	0
64A2	3	Ste Therese Analamiranga	2003-01-29	2	0	7	36.5	0	0	0	0	0	0	0	18	0	0	0	0	0	0	0	0	0	0	0	0	0	0	0	0	0
65A2	3	Ste Therese Analamiranga	2003-01-29	2	1	8	37	1	0	0	0	0	0	0	19	0	0	0	0	0	0	0	0	0	0	0	0	0	0	0	0	0
66A2	3	Ste Therese Analamiranga	2003-01-29	2	1	7	36.7	0	0	0	0	0	0	0	18	0	0	0	0	0	0	0	0	0	0	0	0	0	0	0	0	0
67A2	3	Ste Therese Analamiranga	2003-01-29	2	0	7	36.6	0	0	0	0	0	0	0	19	0	0	0	0	0	0	0	0	0	0	0	0	0	0	0	0	0
68A2	3	Ste Therese Analamiranga	2003-01-29	2	1	6	37.2	1	0	0	0	0	0	0	14	0	0	0	0	0	0	0	0	0	0	0	0	0	0	0	0	0
69A2	3	Ste Therese Analamiranga	2003-01-29	2	1	7	37.2	1	0	0	0	0	0	0	19	0	0	0	0	0	0	0	0	0	0	0	0	0	0	0	0	0
70A2	3	Ste Therese Analamiranga	2003-01-29	2	1	8	36.8	0	0	0	0	0	0	0	17	0	0	0	0	0	0	0	0	0	0	0	0	0	0	0	0	0
71A2	3	Ste Therese Analamiranga	2003-01-29	2	1	7	36.7	0	0	0	0	0	0	0	19	0	0	0	0	0	0	0	0	0	0	0	0	0	0	0	0	0
72A2	3	Ste Therese Analamiranga	2003-01-29	2	1	7	37	1	0	0	0	0	0	0	17	0	0	0	0	0	0	0	0	0	0	0	0	0	0	0	0	0
73A2	3	Ste Therese Analamiranga	2003-01-29	2	1	6	36.8	0	0	0	0	0	0	0	17	0	0	0	0	0	0	0	0	0	0	0	0	0	0	0	0	0
74A2	3	Ste Therese Analamiranga	2003-01-29	2	0	7	37.1	1	0	0	0	0	0	0	16	0	0	0	0	0	0	0	0	0	0	0	0	0	0	0	0	0
75A2	3	Ste Therese Analamiranga	2003-01-29	2	1	8	36.9	0	0	0	0	0	0	0	19	1	47.05	0	0	0	0	0	0	0	0	0	0	0	0	0	0	1
76A2	3	Ste Therese Analamiranga	2003-01-29	2	1	8	36.8	0	0	0	0	0	0	0	17	0	0	0	0	0	0	0	0	0	0	0	0	0	0	0	0	0
77A2	3	Ste Therese Analamiranga	2003-01-29	2	0	7	37.6	1	0	0	0	0	0	0	14	0	0	0	0	0	0	0	0	0	0	0	0	0	0	0	0	0
78A2	3	Ste Therese Analamiranga	2003-01-29	2	0	7	37.9	1	0	0	0	0	0	0	16	0	0	0	0	0	0	0	0	0	0	0	0	0	0	0	0	0
79A2	3	Ste Therese Analamiranga	2003-01-29	2	0	8	37.4	1	0	0	0	0	0	0	24	0	0	0	0	0	0	0	0	0	0	0	0	0	0	0	0	0
80A2	3	Ste Therese Analamiranga	2003-01-29	2	0	8	36.9	0	0	0	0	0	0	0	18	0	0	0	0	0	0	0	0	0	0	0	0	0	0	0	0	0
81A2	3	Ste Therese Analamiranga	2003-01-29	2	0	6	37.2	1	0	0	0	0	0	0	15	0	0	0	0	0	0	0	0	0	0	0	0	0	0	0	0	0
82A2	3	Ste Therese Analamiranga	2003-01-29	2	0	8	36.6	0	0	0	0	0	0	0	26	0	0	0	0	0	0	0	0	0	0	0	0	0	0	0	0	0
83A2	3	Ste Therese Analamiranga	2003-01-29	2	0	7	36.4	0	0	0	0	0	0	0	19	0	0	0	0	0	0	0	0	0	0	0	0	0	0	0	0	0
84A2	3	Ste Therese Analamiranga	2003-01-29	2	0	7	36.2	0	0	0	0	0	0	2	20	0	0	0	0	0	0	0	0	0	0	0	0	0	0	0	0	0
85A2	3	Ste Therese Analamiranga	2003-01-29	2	0	9	36.7	0	0	0	0	0	0	2	21	0	0	0	0	0	0	0	0	0	0	0	0	0	0	0	0	0
86A2	3	Ste Therese Analamiranga	2003-01-29	2	0	11	36.6	0	0	0	0	0	0	0	24	1	47.9	0	0	0	0	0	0	0	0	0	0	0	0	0	0	1
87A2	3	Ste Therese Analamiranga	2003-01-29	2	1	12	36.8	0	0	0	0	0	0	0	24	0	0	0	0	0	0	0	0	0	0	0	0	0	0	0	0	0
88A2	3	Ste Therese Analamiranga	2003-01-29	2	1	7	37.7	1	0	0	0	0	0	0	20	0	0	0	0	0	0	0	0	0	0	0	0	0	0	0	0	0
89A2	3	Ste Therese Analamiranga	2003-01-29	2	1	8	37.1	1	1	0	0	0	1	0	22	1	15.38	0	0	0	0	0	0	0	0	0	0	0	0	0	0	1
90A2	3	Ste Therese Analamiranga	2003-01-29	2	1	7	37.2	1	0	0	0	0	0	1	23	0	0	0	0	0	0	0	0	0	0	0	0	0	0	0	0	0
91A2	3	Ste Therese Analamiranga	2003-01-29	2	0	7	36.6	0	0	0	0	0	0	0	16	0	0	0	0	0	0	0	0	0	0	0	0	0	0	0	0	0
92A2	3	Ste Therese Analamiranga	2003-01-29	2	0	9	36.9	0	0	0	0	0	0	0	21	0	0	0	0	0	0	0	0	0	0	0	0	0	0	0	0	0
93A2	3	Ste Therese Analamiranga	2003-01-29	2	0	7	37.8	1	1	0	0	0	1	0	17	1	4097.56	0	0	0	0	0	0	0	0	0	0	0	0	0	0	1
94A2	3	Ste Therese Analamiranga	2003-01-29	2	0	11	37.4	1	0	0	0	0	0	0	24	0	0	0	0	0	0	0	0	0	0	0	0	0	0	0	0	0
95A2	3	Ste Therese Analamiranga	2003-01-29	2	0	9	36.7	0	0	0	0	0	0	2	20	0	0	0	0	0	0	0	0	0	0	0	0	0	0	0	0	0
96A2	3	Ste Therese Analamiranga	2003-01-29	2	0	7	37.1	1	0	0	0	0	0	0	17	0	0	0	0	0	0	0	0	0	0	0	0	0	0	0	0	0
97A2	3	Ste Therese Analamiranga	2003-01-29	2	0	7	36.8	0	0	0	0	0	0	0	19	0	0	0	0	0	0	0	0	0	0	0	0	0	0	0	0	0
98A2	3	Ste Therese Analamiranga	2003-01-29	2	1	7	36.1	0	0	0	0	0	0	0	16	0	0	0	0	0	0	0	0	0	0	0	0	0	0	0	0	0
99A2	3	Ste Therese Analamiranga	2003-01-29	2	1	7	37	1	0	0	0	0	0	0	17	0	0	0	0	0	0	0	0	0	0	0	0	0	0	0	0	0
100A2	3	Ste Therese Analamiranga	2003-01-29	2	1	7	37	1	0	0	0	0	0	0	18	0	0	0	0	0	0	0	0	0	0	0	0	0	0	0	0	0
101A2	3	EPP Ampasipotsy	2003-01-29	2	0	8	36.6	0	0	0	0	0	0	2	21	1	95.42	0	0	0	0	0	0	0	0	0	0	0	0	0	0	1
102A2	3	EPP Ampasipotsy	2003-01-29	2	0	8	36.8	0	0	0	0	0	0	0	21	0	0	0	0	0	0	0	0	0	0	0	0	0	0	0	0	0
103A2	3	EPP Ampasipotsy	2003-01-29	2	0	9	36.4	0	0	0	0	0	0	0	17	1	2000	0	0	0	0	0	0	0	0	0	0	0	0	0	0	1
104A2	3	EPP Ampasipotsy	2003-01-29	2	0	8	36.6	0	0	0	0	0	0	0	22	0	0	0	0	0	0	0	0	0	0	0	0	0	0	0	0	0
105A2	3	EPP Ampasipotsy	2003-01-29	2	1	9	36.7	0	0	0	0	0	0	0	19	1	1074.62	1	80	0	0	0	0	0	0	0	0	0	0	0	0	1
106A2	3	EPP Ampasipotsy	2003-01-29	2	1	8	36.6	0	0	0	0	0	0	0	17	0	0	0	0	0	0	0	0	0	0	0	0	0	0	0	0	0
107A2	3	EPP Ampasipotsy	2003-01-29	2	1	8	36.7	0	0	0	0	0	0	0	14	0	0	0	0	0	0	0	0	0	0	0	0	0	0	0	0	0
108A2	3	EPP Ampasipotsy	2003-01-29	2	1	8	36.8	0	0	0	0	0	0	0	16	1	127.23	0	0	0	0	0	0	0	0	0	0	0	0	0	0	1
109A2	3	EPP Ampasipotsy	2003-01-29	2	1	8	36.7	0	0	0	0	0	0	0	24	0	0	0	0	0	0	0	0	0	0	0	0	0	0	0	0	0
110A2	3	EPP Ampasipotsy	2003-01-29	2	1	7	36.4	0	0	0	0	0	0	0	19	1	110.45	0	0	0	0	0	0	0	0	0	0	0	0	0	0	1
111A2	3	EPP Ampasipotsy	2003-01-29	2	0	10	36.7	0	0	0	0	0	0	0	19	1	4737.86	1	16	0	0	0	0	0	0	0	0	0	0	0	0	1
112A2	3	EPP Ampasipotsy	2003-01-29	2	0	8	36.2	0	0	0	0	0	0	0	19	0	0	0	0	0	0	0	0	0	0	0	0	0	0	0	0	0
113A2	3	EPP Ampasipotsy	2003-01-29	2	0	12	36.9	0	0	0	0	0	0	2	24	0	0	0	0	0	0	0	0	0	0	0	0	0	0	0	0	0
114A2	3	EPP Ampasipotsy	2003-01-29	2	0	10	36.9	0	0	0	0	0	0	2	19	0	0	0	0	0	0	0	0	0	0	0	0	0	0	0	0	0
115A2	3	EPP Ampasipotsy	2003-01-29	2	0	9	36.5	0	0	0	0	0	0	0	20	0	0	0	0	0	0	0	0	0	0	0	0	0	0	0	0	0
116A2	3	EPP Ampasipotsy	2003-01-29	2	1	8	36.7	0	0	0	0	0	0	2	17	1	1087.37	0	0	0	0	0	0	0	0	0	0	0	0	0	0	1
117A2	3	EPP Ampasipotsy	2003-01-29	2	1	10	36.7	0	0	0	0	0	0	0	19	1	560	0	0	0	0	0	0	0	0	0	0	0	0	0	0	1
118A2	3	EPP Ampasipotsy	2003-01-29	2	0	10	36.2	0	0	0	0	0	0	0	19	1	310.67	0	0	0	0	0	0	0	0	0	0	0	0	0	0	1
119A2	3	EPP Ampasipotsy	2003-01-29	2	1	8	36.8	0	0	0	0	0	0	0	22	1	423.07	0	0	0	0	0	0	0	0	0	0	0	0	0	0	1
120A2	3	EPP Ampasipotsy	2003-01-29	2	0	10	36	0	0	0	0	0	0	0	19	0	0	0	0	0	0	0	0	0	0	0	0	0	0	0	0	0
121A2	3	EPP Ampasipotsy	2003-01-29	2	1	10	36.8	0	0	0	0	0	0	0	25	0	0	0	0	0	0	0	0	0	0	0	0	0	0	0	0	0
122A2	3	EPP Ampasipotsy	2003-01-29	2	1	9	36.2	0	0	0	0	0	0	0	20	0	0	0	0	0	0	0	0	0	0	0	0	0	0	0	0	0
123A2	3	EPP Ampasipotsy	2003-01-29	2	0	9	36.3	0	0	0	0	0	0	0	23	0	0	1	63.61	0	0	0	0	0	0	0	0	0	0	0	0	1
124A2	3	EPP Ampasipotsy	2003-01-29	2	0	11	37.6	1	0	0	0	0	0	0	28	0	0	0	0	0	0	0	0	0	0	0	0	0	0	0	0	0
125A2	3	EPP Ampasipotsy	2003-01-29	2	0	12	37.2	1	0	0	0	0	0	0	30	0	0	0	0	0	0	0	0	0	0	0	0	0	0	0	0	0
126A2	3	EPP Ampasipotsy	2003-01-29	2	1	12	36.2	0	0	0	0	0	0	0	30	1	62.74	0	0	0	0	0	0	0	0	0	0	0	0	0	0	1
127A2	3	EPP Ampasipotsy	2003-01-29	2	1	12	36.2	0	0	0	0	0	0	0	25	1	4647.36	1	96	0	0	0	0	0	0	0	0	0	0	0	0	1
128A2	3	EPP Ampasipotsy	2003-01-29	2	1	12	36.1	0	0	0	0	0	0	0	25	0	0	0	0	0	0	0	0	0	0	0	0	0	0	0	0	0
129A2	3	EPP Ampasipotsy	2003-01-29	2	1	12	36.9	0	0	0	0	0	0	2	29	0	0	1	63.36	0	0	0	0	0	0	0	0	0	0	0	0	1
130A2	3	EPP Ampasipotsy	2003-01-29	2	1	12	36.5	0	0	0	0	0	0	0	24	0	0	0	0	0	0	0	0	0	0	0	0	0	0	0	0	0
131A2	3	EPP Ampasipotsy	2003-01-29	2	0	11	37.1	1	1	0	0	0	1	0	29	1	94.11	0	0	0	0	0	0	0	0	0	0	0	0	0	0	1
132A2	3	EPP Ampasipotsy	2003-01-29	2	0	12	36.5	0	0	0	0	0	0	2	22	0	0	0	0	0	0	0	0	0	0	0	0	0	0	0	0	0
133A2	3	EPP Ampasipotsy	2003-01-29	2	1	11	36.9	0	0	0	0	0	0	0	27	1	1153.48	0	0	0	0	0	0	0	0	0	0	0	0	0	0	1
134A2	3	EPP Ampasipotsy	2003-01-29	2	0	10	36.8	0	0	0	0	0	0	0	24	0	0	0	0	0	0	0	0	0	0	0	0	0	0	0	0	0
135A2	3	EPP Ampasipotsy	2003-01-29	2	0	12	36.5	0	0	0	0	0	0	0	24	1	1188.11	0	0	0	0	0	0	0	0	0	0	0	0	0	0	1
136A2	3	EPP Ampasipotsy	2003-01-29	2	0	12	36.8	0	0	0	0	0	0	2	21	0	0	0	0	0	0	0	0	0	0	0	0	0	0	0	0	0
137A2	3	EPP Ampasipotsy	2003-01-29	2	1	9	36.2	0	0	0	0	0	0	0	19	0	0	0	0	0	0	0	0	0	0	0	0	0	0	0	0	0
138A2	3	EPP Ampasipotsy	2003-01-29	2	0	8	36.1	0	0	0	0	0	0	0	21	0	0	0	0	0	0	0	0	0	0	0	0	0	0	0	0	0
139A2	3	EPP Ampasipotsy	2003-01-29	2	0	8	36.8	0	0	0	0	0	0	0	14	0	0	0	0	0	0	0	0	0	0	0	0	0	0	0	0	0
140A2	3	EPP Ampasipotsy	2003-01-29	2	1	8	36.6	0	0	0	0	0	0	0	24	0	0	0	0	0	0	0	0	0	0	0	0	0	0	0	0	0
141A2	3	EPP Ampasipotsy	2003-01-29	2	0	7	36.9	0	0	0	0	0	0	0	16	0	0	0	0	0	0	0	0	0	0	0	0	0	0	0	0	0
142A2	3	EPP Ampasipotsy	2003-01-29	2	1	11	37.1	1	0	0	0	0	0	0	29	0	0	0	0	0	0	0	0	0	0	0	0	0	0	0	0	0
143A2	3	EPP Ampasipotsy	2003-01-29	2	1	10	36.6	0	0	0	0	0	0	0	24	1	647.61	0	0	0	0	0	0	0	0	0	0	0	0	0	0	1
144A2	3	EPP Ampasipotsy	2003-01-29	2	1	8	36.5	0	0	0	0	0	0	2	17	1	47.05	0	0	0	0	0	0	0	0	0	0	0	0	0	0	1
145A2	3	EPP Ampasipotsy	2003-01-29	2	1	7	36.1	0	0	0	0	0	0	0	18	0	0	0	0	0	0	0	0	0	0	0	0	0	0	0	0	0
146A2	3	EPP Ampasipotsy	2003-01-29	2	1	8	36.7	0	0	0	0	0	0	0	22	0	0	0	0	0	0	0	0	0	0	0	0	0	0	0	0	0
147A2	3	EPP Ampasipotsy	2003-01-29	2	1	10	36.4	0	0	0	0	0	0	0	22	0	0	0	0	0	0	0	0	0	0	0	0	0	0	0	0	0
148A2	3	EPP Ampasipotsy	2003-01-29	2	0	7	36.1	0	0	0	0	0	0	0	19	0	0	0	0	0	0	0	0	0	0	0	0	0	0	0	0	0
149A2	3	EPP Ampasipotsy	2003-01-29	2	1	12	37.1	1	0	0	0	0	0	0	29	0	0	0	0	0	0	0	0	0	0	0	0	0	0	0	0	0
150A2	3	EPP Ampasipotsy	2003-01-29	2	1	6	36.2	0	0	0	0	0	0	0	16	0	0	0	0	0	0	0	0	0	0	0	0	0	0	0	0	0
151A2	3	EPP Ampasipotsy	2003-01-29	2	1	11	37.3	1	0	0	0	0	0	2	30	0	0	0	0	0	0	0	0	0	0	0	0	0	0	0	0	0
152A2	3	EPP Ampasipotsy	2003-01-29	2	1	11	36.4	0	0	0	0	0	0	2	20	1	63.61	0	0	0	0	0	0	0	0	0	0	0	0	0	0	1
153A2	3	EPP Ampasipotsy	2003-01-29	2	1	10	36	0	0	0	0	0	0	0	21	0	0	0	0	0	0	0	0	0	0	0	0	0	0	0	0	0
154A2	3	EPP Ampasipotsy	2003-01-29	2	1	10	36.6	0	0	0	0	0	0	0	20	1	423.07	0	0	0	0	0	0	0	0	0	0	0	0	0	0	1
155A2	3	EPP Ampasipotsy	2003-01-29	2	1	8	36.7	0	0	0	0	0	0	2	23	0	0	0	0	0	0	0	0	0	0	0	0	0	0	0	0	0
156A2	3	EPP Ampasipotsy	2003-01-29	2	1	9	36.1	0	0	0	0	0	0	2	20	1	144	0	0	0	0	0	0	0	0	0	0	0	0	0	0	1
157A2	3	EPP Ampasipotsy	2003-01-29	2	1	12	36.6	0	0	0	0	0	0	2	25	0	0	0	0	0	0	0	0	0	0	0	0	0	0	0	0	0
158A2	3	EPP Ampasipotsy	2003-01-29	2	1	11	37.2	1	1	0	0	0	1	0	29	1	7456.31	0	0	0	0	0	0	0	0	0	0	0	0	0	0	1
159A2	3	EPP Ampasipotsy	2003-01-29	2	1	11	36.1	0	0	0	0	0	0	0	21	1	480	0	0	0	0	0	0	0	0	0	0	0	0	0	0	1
160A2	3	EPP Ampasipotsy	2003-01-29	2	0	8	36.6	0	0	0	0	0	0	0	18	0	0	0	0	0	0	0	0	0	0	0	0	0	0	0	0	0
161A2	3	EPP Ampasipotsy	2003-01-29	2	0	8	39.6	1	1	0	0	0	1	0	22	1	4807.88	0	0	0	0	0	0	0	0	0	0	0	0	0	0	1
162A2	3	EPP Ampasipotsy	2003-01-29	2	1	12	36.9	0	0	0	0	0	0	0	29	0	0	0	0	0	0	0	0	0	0	0	0	0	0	0	0	0
163A2	3	EPP Ampasipotsy	2003-01-29	2	1	12	36.5	0	0	0	0	0	0	0	26	1	240	0	0	0	0	0	0	0	0	0	0	0	0	0	0	1
164A2	3	EPP Ampasipotsy	2003-01-29	2	1	11	36.7	0	0	0	0	0	0	2	26	0	0	0	0	0	0	0	0	0	0	0	0	0	0	0	0	0
165A2	3	EPP Ampasipotsy	2003-01-29	2	1	11	36.8	0	0	0	0	0	0	2	30	0	0	0	0	0	0	0	0	0	0	0	0	0	0	0	0	0
166A2	3	EPP Ampasipotsy	2003-01-29	2	1	11	37.1	1	0	0	0	0	0	0	24	0	0	0	0	0	0	0	0	0	0	0	0	0	0	0	0	0
167A2	3	EPP Ampasipotsy	2003-01-29	2	1	11	36.1	0	0	0	0	0	0	0	23	1	425.12	0	0	0	0	0	0	0	0	0	0	0	0	0	0	1
168A2	3	EPP Ampasipotsy	2003-01-29	2	0	11	36.6	0	0	0	0	0	0	0	34	0	0	0	0	0	0	0	0	0	0	0	0	0	0	0	0	0
169A2	3	EPP Ampasipotsy	2003-01-29	2	0	11	36.2	0	0	0	0	0	0	0	28	0	0	0	0	0	0	0	0	0	0	0	0	0	0	0	0	0
170A2	3	EPP Ampasipotsy	2003-01-29	2	0	11	36.1	0	0	0	0	0	0	0	30	0	0	0	0	0	0	0	0	0	0	0	0	0	0	0	0	0
171A2	3	EPP Ampasipotsy	2003-01-29	2	0	11	36.8	0	0	0	0	0	0	0	29	1	427.18	0	0	0	0	0	0	0	0	0	0	0	0	0	0	1
172A2	3	EPP Ampasipotsy	2003-01-29	2	1	9	36.5	0	0	0	0	0	0	0	20	1	62.74	0	0	0	0	0	0	0	0	0	0	0	0	0	0	1
173A2	3	EPP Ampasipotsy	2003-01-29	2	0	7	36.9	0	0	0	0	0	0	0	20	1	427.18	0	0	0	0	0	0	0	0	0	0	0	0	0	0	1
174A2	3	EPP Ampasipotsy	2003-01-29	2	0	9	36.5	0	0	0	0	0	0	0	19	0	0	0	0	0	0	0	0	0	0	0	0	0	0	0	0	0
175A2	3	EPP Ampasipotsy	2003-01-29	2	1	9	36.2	0	0	0	0	0	0	2	20	0	0	0	0	0	0	0	0	0	0	0	0	0	0	0	0	0
176A2	3	EPP Ampasipotsy	2003-01-29	2	1	7	37	1	0	0	0	0	0	0	24	0	0	0	0	0	0	0	0	0	0	0	0	0	0	0	0	0
177A2	3	EPP Ampasipotsy	2003-01-29	2	1	8	36.9	0	0	0	0	0	0	0	22	0	0	0	0	0	0	0	0	0	0	0	0	0	0	0	0	0
178A2	3	EPP Ampasipotsy	2003-01-29	2	1	12	36.3	0	0	0	0	0	0	0	40	1	5846.15	0	0	0	0	0	0	0	0	0	0	0	0	0	0	1
179A2	3	EPP Ampasipotsy	2003-01-29	2	1	6	36.1	0	0	0	0	0	0	0	19	0	0	0	0	0	0	0	0	0	0	0	0	0	0	0	0	0
180A2	3	EPP Ampasipotsy	2003-01-29	2	1	11	36.7	0	0	0	0	0	0	0	26	1	63.24	0	0	0	0	0	0	0	0	0	0	0	0	0	0	1
181A2	3	EPP Ampasipotsy	2003-01-29	2	0	10	36.7	0	0	0	0	0	0	0	30	0	0	0	0	0	0	0	0	0	0	0	0	0	0	0	0	0
182A2	3	EPP Ampasipotsy	2003-01-29	2	1	12	36.1	0	0	0	0	0	0	0	26	0	0	0	0	0	0	0	0	0	0	0	0	0	0	0	0	0
183A2	3	EPP Ampasipotsy	2003-01-29	2	0	8	36	0	0	0	0	0	0	0	20	0	0	0	0	0	0	0	0	0	0	0	0	0	0	0	0	0
184A2	3	EPP Ampasipotsy	2003-01-29	2	1	11	36.9	0	0	0	0	0	0	2	27	0	0	0	0	0	0	0	0	0	0	0	0	0	0	0	0	0
185A2	3	EPP Ampasipotsy	2003-01-29	2	1	7	36.6	0	0	0	0	0	0	0	19	1	1188.11	0	0	0	0	0	0	0	0	0	0	0	0	0	0	1
186A2	3	EPP Ampasipotsy	2003-01-29	2	1	10	36.6	0	0	0	0	0	0	0	24	0	0	0	0	0	0	0	0	0	0	0	0	0	0	0	0	0
187A2	3	EPP Ampasipotsy	2003-01-29	2	0	7	36.2	0	0	0	0	0	0	0	19	0	0	0	0	0	0	0	0	0	0	0	0	0	0	0	0	0
188A2	3	EPP Ampasipotsy	2003-01-29	2	1	12	36.7	0	0	0	0	0	0	2	26	0	0	0	0	0	0	0	0	0	0	0	0	0	0	0	0	0
189A2	3	EPP Ampasipotsy	2003-01-29	2	0	10	36.5	0	0	0	0	0	0	0	22	1	95.61	0	0	0	0	0	0	0	0	0	0	0	0	0	0	1
190A2	3	EPP Ampasipotsy	2003-01-29	2	1	6	36.9	0	0	0	0	0	0	2	15	0	0	0	0	0	0	0	0	0	0	0	0	0	0	0	0	0
191A2	3	EPP Ampasipotsy	2003-01-29	2	1	10	36.9	0	0	0	0	0	0	0	16	0	0	0	0	0	0	0	0	0	0	0	0	0	0	0	0	0
192A2	3	EPP Ampasipotsy	2003-01-29	2	1	8	36.9	0	0	0	0	0	0	0	16	0	0	0	0	0	0	0	0	0	0	0	0	0	0	0	0	0
193A2	3	EPP Ampasipotsy	2003-01-29	2	1	7	36.2	0	0	0	0	0	0	0	17	1	1159.42	0	0	0	0	0	0	0	0	0	0	0	0	0	0	1
194A2	3	EPP Ampasipotsy	2003-01-29	2	1	7	37.1	1	1	0	0	0	1	0	19	1	1873.17	0	0	0	0	0	0	0	0	0	0	0	0	0	0	1
195A2	3	EPP Ampasipotsy	2003-01-29	2	1	10	37.2	1	1	0	0	0	1	2	27	1	1623.18	0	0	0	0	0	0	0	0	0	0	0	0	0	0	1
196A2	3	EPP Ampasipotsy	2003-01-29	2	1	7	36.8	0	0	0	0	0	0	0	12	1	78.89	0	0	0	0	0	0	0	0	0	0	0	0	0	0	1
197A2	3	EPP Ampasipotsy	2003-01-29	2	1	8	36.4	0	0	0	0	0	0	0	17	1	14588.23	0	0	0	0	0	0	0	0	0	0	0	0	0	0	1
198A2	3	EPP Ampasipotsy	2003-01-29	2	1	10	36.8	0	0	0	0	0	0	0	18	0	0	0	0	0	0	0	0	0	0	0	0	0	0	0	0	0
199A2	3	EPP Ampasipotsy	2003-01-29	2	1	10	36.6	0	0	0	0	0	0	0	20	1	94.86	0	0	0	0	0	0	0	0	0	0	0	0	0	0	1
200A2	3	EPP Ampasipotsy	2003-01-29	2	1	10	36.5	0	0	0	0	0	0	0	22	1	504.85	0	0	0	0	0	0	0	0	0	0	0	0	0	0	1
201A2	3	EPP Analamiranga	2003-01-29	2	0	6	37.1	1	0	0	0	0	0	0	15	0	0	0	0	0	0	0	0	0	0	0	0	0	0	0	0	0
202A2	3	EPP Analamiranga	2003-01-29	2	1	7	36.8	0	0	0	0	0	0	0	19	0	0	0	0	0	0	0	0	0	0	0	0	0	0	0	0	0
203A2	3	Ste Therese Analamiranga	2003-01-29	2	1	7	36.6	0	0	0	0	0	0	0	19	0	0	0	0	0	0	0	0	0	0	0	0	0	0	0	0	0
204A2	3	Ste Therese Analamiranga	2003-01-29	2	1	8	38	1	1	0	0	0	1	0	19	1	1781.99	0	0	0	0	0	0	0	0	0	0	0	0	0	0	1
205A2	3	Ste Therese Analamiranga	2003-01-29	2	1	9	37.1	1	0	0	0	0	0	0	21	0	0	0	0	0	0	0	0	0	0	0	0	0	0	0	0	0
206A2	3	Ste Therese Analamiranga	2003-01-29	2	1	7	37.2	1	0	0	0	0	0	0	18	0	0	0	0	0	0	0	0	0	0	0	0	0	0	0	0	0
207A2	3	Ste Therese Analamiranga	2003-01-29	2	1	8	37.1	1	0	0	0	0	0	0	23	0	0	0	0	0	0	0	0	0	0	0	0	0	0	0	0	0
208A2	3	Ste Therese Analamiranga	2003-01-29	2	1	6	37.2	1	0	0	0	0	0	0	16	0	0	0	0	0	0	0	0	0	0	0	0	0	0	0	0	0
209A2	3	Ste Therese Analamiranga	2003-01-29	2	1	7	37.9	1	0	0	0	0	0	2	17	0	0	0	0	0	0	0	0	0	0	0	0	0	0	0	0	0
210A2	3	Ste Therese Analamiranga	2003-01-29	2	1	6	37.1	1	0	0	0	0	0	0	14	0	0	0	0	0	0	0	0	0	0	0	0	0	0	0	0	0
211A2	3	Ste Therese Analamiranga	2003-01-29	2	1	9	37.1	1	0	0	0	0	0	0	22	0	0	0	0	0	0	0	0	0	0	0	0	0	0	0	0	0
212A2	3	Ste Therese Analamiranga	2003-01-29	2	1	12	36.6	0	0	0	0	0	0	0	35	0	0	0	0	0	0	0	0	0	0	0	0	0	0	0	0	0
1A3	3	EPP Ampasipotsy	2003-05-28	3	0	7	36	0	0	0	0	0	0	2	15	1	1208.87	0	0	0	0	0	0	0	0	0	0	0	0	0	0	1
2A3	3	EPP Ampasipotsy	2003-05-28	3	0	8	36.6	0	0	0	0	0	0	0	18	0	0	0	0	1	47.24	1	47.24	0	0	0	0	0	0	0	0	1
3A3	3	EPP Ampasipotsy	2003-05-28	3	0	8	36.6	0	0	0	0	0	0	0	23	1	796.2	0	0	0	0	0	0	0	0	0	0	1	79.84	1	239.52	1
4A3	3	EPP Ampasipotsy	2003-05-28	3	0	8	36.6	0	0	0	0	0	0	0	19	0	0	0	0	0	0	0	0	0	0	0	0	0	0	0	0	0
5A3	3	EPP Ampasipotsy	2003-05-28	3	0	8	37.5	1	0	0	0	0	0	0	20	0	0	0	0	0	0	0	0	0	0	0	0	0	0	0	0	0
6A3	3	EPP Ampasipotsy	2003-05-28	3	0	7	37.3	1	1	0	0	0	1	0	17	1	2523.22	1	382.52	0	0	0	0	0	0	0	0	0	0	0	0	1
7A3	3	EPP Ampasipotsy	2003-05-28	3	0	8	37.8	1	1	0	0	0	1	0	20	1	4427.9	0	0	0	0	0	0	0	0	0	0	0	0	0	0	1
8A3	3	EPP Ampasipotsy	2003-05-28	3	1	7	37.7	1	1	0	0	0	1	3	22	1	1198.06	0	0	0	0	0	0	0	0	0	0	0	0	0	0	1
9A3	3	EPP Ampasipotsy	2003-05-28	3	1	8	37.3	1	1	0	0	0	1	0	19	1	1287.8	0	0	0	0	0	0	0	0	0	0	0	0	1	77.78	1
10A3	3	EPP Ampasipotsy	2003-05-28	3	1	9	37.2	1	1	0	0	0	1	0	19	1	263.05	1	15.47	0	0	0	0	0	0	0	0	0	0	0	0	1
11A3	3	EPP Ampasipotsy	2003-05-28	3	1	9	37.5	1	1	0	0	0	1	0	19	1	106.77	0	0	0	0	0	0	0	0	0	0	0	0	0	0	1
12A3	3	EPP Ampasipotsy	2003-05-28	3	1	9	36.7	0	0	0	0	0	0	2	20	0	0	0	0	0	0	0	0	0	0	0	0	0	0	0	0	0
13A3	3	EPP Ampasipotsy	2003-05-28	3	1	9	37.1	1	0	0	0	0	0	0	20	0	0	0	0	0	0	0	0	0	0	0	0	0	0	0	0	0
14A3	3	EPP Ampasipotsy	2003-05-28	3	1	10	36.3	0	0	0	0	0	0	0	20	0	0	0	0	0	0	0	0	0	0	0	0	0	0	0	0	0
15A3	3	EPP Ampasipotsy	2003-05-28	3	1	12	36.3	0	0	0	0	0	0	0	29	1	653.84	1	15.35	0	0	0	0	0	0	0	0	0	0	0	0	1
16A3	3	EPP Ampasipotsy	2003-05-28	3	1	12	36.9	0	0	0	0	0	0	0	27	1	79.2	0	0	0	0	0	0	0	0	0	0	0	0	0	0	1
17A3	3	EPP Ampasipotsy	2003-05-28	3	1	10	37	1	1	0	0	0	1	0	24	1	92.84	1	92.84	0	0	0	0	0	0	0	0	0	0	0	0	1
18A3	3	EPP Ampasipotsy	2003-05-28	3	0	12	36.1	0	0	0	0	0	0	0	29	1	1790.47	1	15.77	0	0	0	0	0	0	0	0	0	0	0	0	1
19A3	3	EPP Ampasipotsy	2003-05-28	3	0	9	36.5	0	0	0	0	0	0	0	25	1	5600	1	15.77	0	0	0	0	0	0	0	0	0	0	0	0	1
20A3	3	EPP Ampasipotsy	2003-05-28	3	1	9	37.4	1	1	0	0	0	1	0	22	1	5045.04	0	0	0	0	0	0	0	0	0	0	0	0	0	0	1
21A3	3	EPP Ampasipotsy	2003-05-28	3	0	7	36.6	0	0	0	0	0	0	0	22	0	0	0	0	0	0	0	0	0	0	0	0	0	0	0	0	0
22A3	3	EPP Ampasipotsy	2003-05-28	3	0	11	36.6	0	0	0	0	0	0	0	32	0	0	1	32	0	0	0	0	0	0	0	0	0	0	0	0	1
23A3	3	EPP Ampasipotsy	2003-05-28	3	0	10	36	0	0	0	0	0	0	0	21	1	48	0	0	0	0	0	0	0	0	0	0	0	0	0	0	1
24A3	3	EPP Ampasipotsy	2003-05-28	3	0	10	37.5	1	0	0	0	0	0	0	22	0	0	0	0	0	0	0	0	0	0	0	0	0	0	0	0	0
25A3	3	EPP Ampasipotsy	2003-05-28	3	0	12	36	0	0	0	0	0	0	0	21	1	680	0	0	0	0	0	0	0	0	0	0	0	0	0	0	1
26A3	3	EPP Ampasipotsy	2003-05-28	3	0	12	36.6	0	0	0	0	0	0	0	25	1	108.94	0	0	0	0	0	0	0	0	0	0	0	0	0	0	1
27A3	3	EPP Ampasipotsy	2003-05-28	3	0	12	37.1	1	0	0	0	0	0	0	35	0	0	0	0	0	0	0	0	0	0	0	0	0	0	0	0	0
28A3	3	EPP Ampasipotsy	2003-05-28	3	0	11	37	1	1	0	0	0	1	0	29	1	6029.55	0	0	0	0	0	0	0	0	0	0	0	0	0	0	1
29A3	3	EPP Ampasipotsy	2003-05-28	3	0	11	36.2	0	0	0	0	0	0	0	29	0	0	0	0	0	0	0	0	0	0	0	0	0	0	0	0	0
30A3	3	EPP Ampasipotsy	2003-05-28	3	1	9	37.3	1	1	0	0	0	1	0	23	1	705.88	1	31.87	0	0	0	0	0	0	0	0	0	0	0	0	1
31A3	3	EPP Ampasipotsy	2003-05-28	3	1	11	36.2	0	0	0	0	0	0	0	29	1	1000	0	0	0	0	0	0	0	0	0	0	0	0	0	0	1
32A3	3	EPP Ampasipotsy	2003-05-28	3	1	12	37.3	1	0	0	0	0	0	0	27	0	0	0	0	0	0	0	0	0	0	0	0	0	0	0	0	0
33A3	3	EPP Ampasipotsy	2003-05-28	3	1	12	37.1	1	1	0	0	0	1	0	29	1	892.85	0	0	0	0	0	0	0	0	0	0	0	0	0	0	1
34A3	3	EPP Ampasipotsy	2003-05-28	3	1	11	36.7	0	0	0	0	0	0	0	30	0	0	1	15.74	0	0	0	0	0	0	0	0	0	0	0	0	1
35A3	3	EPP Ampasipotsy	2003-05-28	3	1	12	36.2	0	0	0	0	0	0	0	29	0	0	0	0	0	0	0	0	0	0	0	0	0	0	0	0	0
36A3	3	EPP Ampasipotsy	2003-05-28	3	1	12	37.2	1	1	0	0	0	1	0	25	1	760	1	31.55	0	0	0	0	0	0	0	0	0	0	0	0	1
37A3	3	EPP Ampasipotsy	2003-05-28	3	1	12	36.3	0	0	0	0	0	0	0	25	1	4038.83	0	0	0	0	0	0	0	0	0	0	0	0	0	0	1
38A3	3	EPP Ampasipotsy	2003-05-28	3	1	12	37.3	1	0	0	0	0	0	0	26	0	0	0	0	0	0	0	0	0	0	0	0	0	0	0	0	0
39A3	3	EPP Ampasipotsy	2003-05-28	3	1	11	37.5	1	1	0	0	0	1	0	25	1	31.8	0	0	0	0	0	0	0	0	0	0	0	0	0	0	1
40A3	3	EPP Ampasipotsy	2003-05-28	3	0	12	37.6	1	0	0	0	0	0	0	31	0	0	0	0	0	0	0	0	0	0	0	0	0	0	0	0	0
41A3	3	EPP Ampasipotsy	2003-05-28	3	0	11	37.1	1	1	0	0	0	1	0	29	1	560	1	110.45	0	0	0	0	0	0	0	0	0	0	0	0	1
42A3	3	EPP Ampasipotsy	2003-05-28	3	0	12	36.2	0	0	0	0	0	0	0	29	1	692.3	1	127.74	0	0	0	0	0	0	0	0	0	0	0	0	1
43A3	3	EPP Ampasipotsy	2003-05-28	3	1	12	36.5	0	0	0	0	0	0	0	29	0	0	0	0	0	0	0	0	0	0	0	0	0	0	0	0	0
44A3	3	EPP Ampasipotsy	2003-05-28	3	1	12	36.9	0	0	0	0	0	0	0	25	1	1920	0	0	0	0	0	0	0	0	0	0	0	0	0	0	1
45A3	3	EPP Ampasipotsy	2003-05-28	3	1	12	37.2	1	1	0	0	0	1	0	26	1	509.8	0	0	0	0	0	0	0	0	0	0	0	0	0	0	1
46A3	3	EPP Ampasipotsy	2003-05-28	3	1	10	37.1	1	0	0	0	0	0	0	20	0	0	1	15.84	0	0	0	0	0	0	0	0	0	0	0	0	1
47A3	3	EPP Ampasipotsy	2003-05-28	3	1	12	37.2	1	1	0	0	0	1	0	25	1	3766.99	1	15.84	0	0	0	0	0	0	0	0	0	0	0	0	1
48A3	3	EPP Ampasipotsy	2003-05-28	3	0	9	37.1	1	0	0	0	0	0	0	21	0	0	0	0	0	0	0	0	0	0	0	0	0	0	0	0	0
49A3	3	EPP Ampasipotsy	2003-05-28	3	0	10	36.9	0	0	0	0	0	0	0	25	0	0	0	0	0	0	0	0	0	0	0	0	0	0	0	0	0
50A3	3	EPP Ampasipotsy	2003-05-28	3	0	11	37.2	1	0	0	0	0	0	0	22	0	0	0	0	0	0	0	0	0	0	0	0	0	0	0	0	0
51A3	3	EPP Ampasipotsy	2003-05-28	3	0	10	37.5	1	1	0	0	0	1	0	20	1	1353.23	0	0	0	0	0	0	0	0	0	0	0	0	0	0	1
52A3	3	EPP Ampasipotsy	2003-05-28	3	1	12	36.6	0	0	0	0	0	0	0	30	0	0	0	0	0	0	0	0	0	0	0	0	0	0	0	0	0
53A3	3	EPP Ampasipotsy	2003-05-28	3	0	12	37.1	1	0	0	0	0	0	0	28	0	0	0	0	0	0	0	0	0	0	0	0	0	0	0	0	0
54A3	3	EPP Ampasipotsy	2003-05-28	3	0	9	37.1	1	0	0	0	0	0	0	22	0	0	0	0	0	0	0	0	0	0	0	0	0	0	0	0	0
55A3	3	EPP Ampasipotsy	2003-05-28	3	0	9	36.9	0	0	0	0	0	0	2	20	1	91.25	1	15.2	0	0	0	0	0	0	0	0	0	0	0	0	1
56A3	3	EPP Ampasipotsy	2003-05-28	3	0	12	37.5	1	0	0	0	0	0	2	27	0	0	0	0	0	0	0	0	0	0	0	0	0	0	0	0	0
57A3	3	EPP Ampasipotsy	2003-05-28	3	0	10	37.2	1	1	0	0	0	1	0	19	1	663.75	0	0	0	0	0	0	0	0	0	0	0	0	0	0	1
58A3	3	EPP Ampasipotsy	2003-05-28	3	0	11	36.9	0	0	0	0	0	0	0	20	1	123.79	0	0	0	0	0	0	0	0	0	0	0	0	0	0	1
59A3	3	EPP Ampasipotsy	2003-05-28	3	0	11	36.9	0	0	0	0	0	0	3	24	1	250.48	0	0	0	0	0	0	0	0	0	0	0	0	0	0	1
60A3	3	EPP Ampasipotsy	2003-05-28	3	0	12	37.3	1	0	0	0	0	0	0	25	0	0	0	0	0	0	0	0	0	0	0	0	0	0	0	0	0
61A3	3	EPP Ampasipotsy	2003-05-28	3	0	12	36.2	0	0	0	0	0	0	0	34	1	1148.51	0	0	0	0	0	0	0	0	0	0	0	0	0	0	1
62A3	3	EPP Ampasipotsy	2003-05-28	3	1	11	38.9	1	1	0	0	0	1	0	22	1	15160	0	0	0	0	0	0	0	0	0	0	0	0	0	0	1
63A3	3	EPP Ampasipotsy	2003-05-28	3	1	9	37.3	1	1	0	0	0	1	0	20	1	95.8	0	0	0	0	0	0	0	0	0	0	0	0	0	0	1
64A3	3	EPP Ampasipotsy	2003-05-28	3	1	10	37.2	1	1	1	0	0	1	0	21	1	769.23	0	0	1	94.67	1	47.33	0	0	0	0	0	0	0	0	1
65A3	3	EPP Ampasipotsy	2003-05-28	3	0	9	36.7	0	0	0	0	0	0	0	16	0	0	0	0	0	0	0	0	0	0	0	0	0	0	0	0	0
66A3	3	EPP Ampasipotsy	2003-05-28	3	1	12	36.8	0	0	0	0	0	0	0	25	0	0	0	0	0	0	0	0	0	0	0	0	0	0	0	0	0
67A3	3	EPP Ampasipotsy	2003-05-28	3	1	12	37.5	1	1	0	0	0	1	0	30	1	125	0	0	0	0	0	0	0	0	0	0	0	0	0	0	1
68A3	3	EPP Ampasipotsy	2003-05-28	3	1	12	37.2	1	1	0	0	0	1	0	24	1	590.29	0	0	0	0	0	0	0	0	0	0	0	0	0	0	1
69A3	3	EPP Ampasipotsy	2003-05-28	3	1	10	37.6	1	1	0	0	0	1	0	18	1	111.77	0	0	0	0	0	0	0	0	0	0	0	0	0	0	1
70A3	3	EPP Ampasipotsy	2003-05-28	3	1	11	36.7	0	0	0	0	0	0	0	20	1	63.24	0	0	0	0	0	0	0	0	0	0	0	0	0	0	1
71A3	3	EPP Ampasipotsy	2003-05-28	3	0	10	37.2	1	1	0	0	0	1	0	24	1	110.01	0	0	0	0	0	0	0	0	0	0	0	0	0	0	1
72A3	3	EPP Ampasipotsy	2003-05-28	3	0	9	36.9	0	0	0	0	0	0	4	19	1	571.42	0	0	0	0	0	0	0	0	0	0	0	0	0	0	1
73A3	3	EPP Ampasipotsy	2003-05-28	3	0	12	37.2	1	1	0	0	0	1	0	22	1	311.28	0	0	0	0	0	0	0	0	0	0	0	0	0	0	1
74A3	3	EPP Ampasipotsy	2003-05-28	3	0	12	37.1	1	1	0	0	0	1	0	23	1	31.18	1	15.59	0	0	0	0	0	0	0	0	0	0	0	0	1
75A3	3	EPP Ampasipotsy	2003-05-28	3	0	10	37.4	1	1	0	0	0	1	0	21	1	143.14	0	0	0	0	0	0	0	0	0	0	0	0	0	0	1
76A3	3	EPP Ampasipotsy	2003-05-28	3	0	12	37.5	1	0	0	0	0	0	0	29	0	0	0	0	0	0	0	0	0	0	0	0	0	0	0	0	0
77A3	3	EPP Ampasipotsy	2003-05-28	3	1	8	36.9	0	0	0	0	0	0	0	24	0	0	0	0	0	0	0	0	0	0	0	0	0	0	0	0	0
78A3	3	EPP Ampasipotsy	2003-05-28	3	1	10	37.1	1	1	0	0	0	1	0	23	1	259.54	1	30.53	0	0	0	0	0	0	0	0	0	0	0	0	1
79A3	3	EPP Ampasipotsy	2003-05-28	3	1	9	37.2	1	1	0	0	0	1	0	22	1	618.35	1	111.77	0	0	0	0	0	0	0	0	0	0	0	0	1
80A3	3	EPP Ampasipotsy	2003-05-28	3	1	9	36.1	0	0	0	0	0	0	0	21	0	0	0	0	0	0	0	0	0	0	0	0	0	0	0	0	0
81A3	3	EPP Ampasipotsy	2003-05-28	3	1	8	37.2	1	0	0	0	0	0	0	20	0	0	0	0	0	0	0	0	0	0	0	0	0	0	0	0	0
82A3	3	EPP Ampasipotsy	2003-05-28	3	0	10	37.1	1	1	0	0	0	1	0	19	1	318.35	0	0	0	0	0	0	0	0	0	0	0	0	0	0	1
83A3	3	EPP Ampasipotsy	2003-05-28	3	0	10	37.7	1	1	0	0	0	1	3	23	1	110.45	0	0	0	0	0	0	0	0	0	0	0	0	0	0	1
84A3	3	EPP Ampasipotsy	2003-05-28	3	1	9	36.9	0	0	0	0	0	0	0	22	1	854.36	0	0	0	0	0	0	0	0	0	0	0	0	0	0	1
85A3	3	EPP Ampasipotsy	2003-05-28	3	1	10	36.8	0	0	0	0	0	0	0	26	1	31.26	0	0	0	0	0	0	0	0	0	0	0	0	0	0	1
86A3	3	EPP Ampasipotsy	2003-05-28	3	1	12	37.7	1	1	0	0	0	1	0	25	1	31.8	0	0	0	0	0	0	0	0	0	0	0	0	0	0	1
87A3	3	EPP Ampasipotsy	2003-05-28	3	1	10	36.9	0	0	0	0	0	0	2	21	0	0	0	0	1	95.42	1	47.71	0	0	0	0	0	0	0	0	1
88A3	3	EPP Ampasipotsy	2003-05-28	3	1	11	37.2	1	1	0	0	0	1	0	22	1	3942.58	0	0	0	0	0	0	0	0	0	0	0	0	0	0	1
89A3	3	EPP Ampasipotsy	2003-05-28	3	1	12	37.2	1	1	0	0	0	1	3	26	1	159.04	1	15.9	0	0	0	0	0	0	0	0	0	0	0	0	1
90A3	3	EPP Ampasipotsy	2003-05-28	3	1	10	36.8	0	0	0	0	0	0	0	24	0	0	0	0	0	0	0	0	0	0	0	0	0	0	0	0	0
91A3	3	EPP Ampasipotsy	2003-05-28	3	1	9	37.5	1	1	0	0	0	1	0	20	1	517.41	0	0	0	0	0	0	0	0	0	0	0	0	0	0	1
92A3	3	EPP Ampasipotsy	2003-05-28	3	0	7	37.1	1	1	0	0	0	1	0	17	1	47.33	0	0	0	0	0	0	0	0	0	0	0	0	0	0	1
93A3	3	EPP Ampasipotsy	2003-05-28	3	0	7	37.7	1	1	0	0	0	1	0	18	1	1201.87	0	0	0	0	0	0	0	0	0	0	0	0	0	0	1
94A3	3	EPP Ampasipotsy	2003-05-28	3	1	7	38.6	1	1	0	0	0	1	0	19	1	12869.56	0	0	0	0	0	0	0	0	0	0	0	0	0	0	1
95A3	3	EPP Ampasipotsy	2003-05-28	3	1	8	37.2	1	0	0	0	0	0	4	19	0	0	0	0	0	0	0	0	0	0	0	0	0	0	0	0	0
96A3	3	EPP Ampasipotsy	2003-05-28	3	1	8	37.2	1	1	0	0	0	1	3	15	1	1019.6	0	0	0	0	0	0	0	0	0	0	0	0	0	0	1
97A3	3	EPP Ampasipotsy	2003-05-28	3	1	8	37.3	1	1	0	0	0	1	0	25	1	667.6	0	0	0	0	0	0	0	0	0	0	0	0	0	0	1
98A3	3	EPP Ampasipotsy	2003-05-28	3	1	8	37.1	1	1	0	0	0	1	0	15	1	7881.77	0	0	0	0	0	0	0	0	0	0	0	0	0	0	1
99A3	3	EPP Ampasipotsy	2003-05-28	3	1	12	37.3	1	1	0	0	0	1	2	24	1	32	0	0	0	0	0	0	0	0	0	0	0	0	0	0	1
100A3	3	EPP Ampasipotsy	2003-05-28	3	1	9	36.9	0	0	0	0	0	0	3	18	0	0	0	0	0	0	0	0	0	0	0	0	0	0	0	0	0
101A3	3	EPP Ampasipotsy	2003-05-28	3	0	9	37.5	1	1	0	0	0	1	0	20	1	255.15	0	0	0	0	0	0	0	0	0	0	0	0	0	0	1
102A3	3	EPP Ampasipotsy	2003-05-28	3	0	8	37.9	1	1	0	0	0	1	0	18	1	219.17	0	0	0	0	0	0	0	0	0	0	0	0	0	0	1
103A3	3	EPP Ampasipotsy	2003-05-28	3	0	8	37.4	1	1	0	0	0	1	0	17	1	1963.63	1	16	0	0	1	545.45	0	0	0	0	0	0	0	0	1
104A3	3	EPP Ampasipotsy	2003-05-28	3	1	6	37.3	1	1	0	0	0	1	0	17	1	446.51	0	0	0	0	0	0	0	0	0	0	0	0	0	0	1
105A3	3	EPP Analamiranga	2003-05-30	3	0	8	37.2	1	0	0	0	1	1	0	20	0	0	0	0	0	0	0	0	0	0	0	0	1	126.98	1	31.74	1
106A3	3	EPP Analamiranga	2003-05-30	3	0	10	36.4	0	0	0	0	0	0	0	22	0	0	0	0	0	0	0	0	0	0	0	0	0	0	0	0	0
107A3	3	EPP Analamiranga	2003-05-30	3	0	8	36.7	0	0	0	0	0	0	0	20	0	0	0	0	0	0	0	0	0	0	0	0	0	0	0	0	0
108A3	3	EPP Analamiranga	2003-05-30	3	0	8	37.2	1	1	0	0	0	1	3	24	1	624.39	0	0	0	0	0	0	0	0	0	0	0	0	0	0	1
109A3	3	EPP Analamiranga	2003-05-30	3	0	9	36.8	0	0	0	0	0	0	0	21	0	0	0	0	0	0	0	0	0	0	0	0	0	0	0	0	0
110A3	3	EPP Analamiranga	2003-05-30	3	0	7	36.8	0	0	0	0	0	0	0	19	0	0	0	0	0	0	0	0	0	0	0	0	0	0	0	0	0
111A3	3	EPP Analamiranga	2003-05-30	3	0	6	37.6	1	0	0	0	0	0	0	17	0	0	0	0	0	0	0	0	0	0	0	0	0	0	0	0	0
112A3	3	EPP Analamiranga	2003-05-30	3	1	9	37.2	1	0	0	0	0	0	0	22	0	0	0	0	0	0	0	0	0	0	0	0	0	0	0	0	0
113A3	3	EPP Analamiranga	2003-05-30	3	1	11	36.2	0	0	0	0	0	0	0	28	0	0	0	0	0	0	0	0	0	0	0	0	1	236.98	0	0	1
114A3	3	EPP Analamiranga	2003-05-30	3	0	10	37.7	1	0	0	0	0	0	0	26	0	0	0	0	0	0	0	0	0	0	0	0	0	0	0	0	0
115A3	3	EPP Analamiranga	2003-05-30	3	1	8	37.2	1	0	0	0	0	0	0	19	0	0	0	0	0	0	0	0	0	0	0	0	0	0	0	0	0
116A3	3	EPP Analamiranga	2003-05-30	3	1	10	36.4	0	0	0	0	0	0	0	23	1	9000	0	0	0	0	0	0	0	0	0	0	0	0	0	0	1
117A3	3	EPP Analamiranga	2003-05-30	3	0	11	36.8	0	0	0	0	0	0	0	24	0	0	0	0	0	0	0	0	0	0	0	0	0	0	0	0	0
118A3	3	EPP Analamiranga	2003-05-30	3	0	6	37.5	1	0	0	0	0	0	0	16	0	0	0	0	0	0	0	0	0	0	0	0	0	0	0	0	0
119A3	3	EPP Analamiranga	2003-05-30	3	1	8	37.3	1	0	0	0	0	0	0	21	0	0	0	0	0	0	0	0	0	0	0	0	0	0	0	0	0
120A3	3	EPP Analamiranga	2003-05-30	3	1	7	36.8	0	0	0	0	0	0	0	27	0	0	0	0	0	0	0	0	0	0	0	0	0	0	0	0	0
121A3	3	EPP Analamiranga	2003-05-30	3	0	8	36.9	0	0	0	0	0	0	0	16	0	0	0	0	0	0	0	0	0	0	0	0	1	2018.69	1	93.93	1
122A3	3	EPP Analamiranga	2003-05-30	3	0	8	36.9	0	0	0	0	0	0	0	20	0	0	0	0	0	0	0	0	0	0	0	0	0	0	0	0	0
123A3	3	EPP Analamiranga	2003-05-30	3	0	12	36.6	0	0	0	0	0	0	0	34	0	0	0	0	0	0	0	0	0	0	0	0	0	0	0	0	0
124A3	3	EPP Analamiranga	2003-05-30	3	0	9	37	1	1	0	0	0	1	0	22	1	92.3	0	0	0	0	0	0	0	0	0	0	0	0	0	0	1
125A3	3	EPP Analamiranga	2003-05-30	3	1	10	36.6	0	0	0	0	0	0	0	24	0	0	0	0	0	0	0	0	0	0	0	0	0	0	0	0	0
126A3	3	EPP Analamiranga	2003-05-30	3	0	6	36.4	0	0	0	0	0	0	0	16	1	1913	1	142.55	0	0	0	0	0	0	0	0	0	0	0	0	1
127A3	3	EPP Analamiranga	2003-05-30	3	0	7	36.8	0	0	0	0	0	0	0	15	0	0	0	0	0	0	0	0	0	0	0	0	0	0	0	0	0
128A3	3	EPP Analamiranga	2003-05-30	3	1	8	37.2	1	0	0	0	0	0	0	19	0	0	0	0	0	0	0	0	0	0	0	0	0	0	0	0	0
129A3	3	EPP Analamiranga	2003-05-30	3	1	7	36.8	0	0	0	0	0	0	0	18	0	0	0	0	0	0	0	0	0	0	0	0	0	0	0	0	0
130A3	3	EPP Analamiranga	2003-05-30	3	1	9	36.9	0	0	0	0	0	0	0	20	0	0	0	0	0	0	0	0	0	0	0	0	0	0	0	0	0
131A3	3	EPP Analamiranga	2003-05-30	3	1	7	37.2	1	0	0	0	0	0	0	20	0	0	0	0	0	0	0	0	0	0	0	0	0	0	0	0	0
132A3	3	EPP Analamiranga	2003-05-30	3	0	7	36.7	0	0	0	0	0	0	0	16	1	62.74	0	0	0	0	0	0	0	0	0	0	0	0	0	0	1
133A3	3	EPP Analamiranga	2003-05-30	3	1	8	37	1	0	0	0	0	0	0	19	0	0	0	0	0	0	0	0	0	0	0	0	0	0	0	0	0
134A3	3	EPP Analamiranga	2003-05-30	3	1	8	37.1	1	0	0	0	0	0	0	18	0	0	0	0	0	0	0	0	0	0	0	0	0	0	0	0	0
135A3	3	EPP Analamiranga	2003-05-30	3	1	7	37.2	1	0	0	0	0	0	0	17	0	0	0	0	0	0	0	0	0	0	0	0	0	0	0	0	0
136A3	3	EPP Analamiranga	2003-05-30	3	0	8	37.1	1	0	0	0	0	0	0	18	0	0	0	0	0	0	0	0	0	0	0	0	0	0	0	0	0
137A3	3	EPP Analamiranga	2003-05-30	3	0	7	36.8	0	0	0	0	0	0	0	18	0	0	0	0	0	0	0	0	0	0	0	0	1	551.72	0	0	1
138A3	3	EPP Analamiranga	2003-05-30	3	0	6	36.9	0	0	0	0	0	0	2	17	0	0	0	0	0	0	0	0	0	0	0	0	1	15.68	0	0	1
139A3	3	EPP Analamiranga	2003-05-30	3	1	7	37	1	1	0	0	0	1	0	20	1	15038.46	0	0	0	0	0	0	0	0	0	0	0	0	0	0	1
140A3	3	EPP Analamiranga	2003-05-30	3	0	6	37.9	1	0	0	0	0	0	0	14	0	0	0	0	0	0	0	0	0	0	0	0	0	0	0	0	0
141A3	3	EPP Analamiranga	2003-05-30	3	0	6	37.5	1	0	0	0	0	0	0	16	0	0	0	0	0	0	0	0	0	0	0	0	0	0	0	0	0
142A3	3	EPP Analamiranga	2003-05-30	3	1	8	36.9	0	0	0	0	0	0	0	20	1	2091.74	0	0	0	0	0	0	0	0	0	0	0	0	0	0	1
143A3	3	EPP Analamiranga	2003-05-30	3	1	6	37.3	1	1	0	0	0	1	0	17	1	12505.85	0	0	0	0	0	0	0	0	0	0	0	0	0	0	1
144A3	3	EPP Analamiranga	2003-05-30	3	1	8	37.9	1	1	0	0	0	1	0	21	1	588.23	0	0	0	0	0	0	0	0	0	0	0	0	0	0	1
145A3	3	EPP Analamiranga	2003-05-30	3	0	6	37.3	1	0	0	0	0	0	0	18	0	0	0	0	0	0	0	0	0	0	0	0	0	0	0	0	0
146A3	3	EPP Analamiranga	2003-05-30	3	0	9	37.5	1	1	0	0	0	1	0	24	1	1557.56	1	36.19	0	0	0	0	0	0	0	0	0	0	0	0	1
147A3	3	EPP Analamiranga	2003-05-30	3	0	6	37.1	1	0	0	0	0	0	0	17	0	0	0	0	0	0	0	0	0	0	0	0	0	0	0	0	0
148A3	3	EPP Analamiranga	2003-05-30	3	0	11	36.6	0	0	0	0	0	0	0	26	0	0	0	0	0	0	0	0	0	0	0	0	0	0	0	0	0
149A3	3	EPP Analamiranga	2003-05-30	3	0	10	36.7	0	0	0	0	0	0	0	24	0	0	0	0	0	0	0	0	0	0	0	0	0	0	0	0	0
150A3	3	EPP Analamiranga	2003-05-30	3	0	10	38.7	1	0	0	0	0	0	0	21	0	0	0	0	0	0	0	0	0	0	0	0	0	0	0	0	0
151A3	3	EPP Analamiranga	2003-05-30	3	1	9	37.1	1	0	0	0	1	1	0	22	0	0	0	0	0	0	0	0	0	0	0	0	1	94.86	1	15.81	1
152A3	3	EPP Analamiranga	2003-05-30	3	1	7	36.3	0	0	0	0	0	0	0	20	0	0	0	0	0	0	0	0	0	0	0	0	0	0	0	0	0
153A3	3	EPP Analamiranga	2003-05-30	3	1	9	37.3	1	0	0	0	0	0	0	23	0	0	0	0	0	0	0	0	0	0	0	0	0	0	0	0	0
154A3	3	EPP Analamiranga	2003-05-30	3	1	9	36.3	0	0	0	0	0	0	0	20	0	0	0	0	0	0	0	0	0	0	0	0	1	186.04	0	0	1
155A3	3	EPP Analamiranga	2003-05-30	3	0	10	38.7	1	1	0	0	0	1	0	21	1	1398.05	0	0	0	0	0	0	0	0	0	0	0	0	0	0	1
156A3	3	EPP Analamiranga	2003-05-30	3	0	10	37.6	1	1	0	0	0	1	0	20	1	14786	0	0	0	0	0	0	0	0	0	0	0	0	0	0	1
157A3	3	EPP Analamiranga	2003-05-30	3	0	10	36.1	0	0	0	0	0	0	0	24	0	0	0	0	0	0	0	0	0	0	0	0	0	0	0	0	0
158A3	3	EPP Analamiranga	2003-05-30	3	0	10	36.7	0	0	0	0	0	0	0	26	0	0	0	0	0	0	0	0	0	0	0	0	0	0	0	0	0
159A3	3	EPP Analamiranga	2003-05-30	3	1	10	36.6	0	0	0	0	0	0	0	27	0	0	0	0	0	0	0	0	0	0	0	0	0	0	0	0	0
160A3	3	EPP Analamiranga	2003-05-30	3	1	10	37.5	1	1	0	0	0	1	0	22	1	3412.32	0	0	0	0	0	0	0	0	0	0	0	0	0	0	1
161A3	3	Ste Therese Analamiranga	2003-05-30	3	0	9	41.4	1	0	0	0	1	1	0	20	0	0	0	0	0	0	0	0	0	0	0	0	1	78.27	1	78.27	1
162A3	3	Ste Therese Analamiranga	2003-05-30	3	0	10	36	0	0	0	0	0	0	0	25	0	0	0	0	0	0	0	0	0	0	0	0	0	0	0	0	0
163A3	3	Ste Therese Analamiranga	2003-05-30	3	0	12	36.9	0	0	0	0	0	0	0	29	0	0	0	0	0	0	0	0	0	0	0	0	0	0	0	0	0
164A3	3	Ste Therese Analamiranga	2003-05-30	3	0	11	36.2	0	0	0	0	0	0	0	25	0	0	0	0	0	0	0	0	0	0	0	0	0	0	0	0	0
165A3	3	Ste Therese Analamiranga	2003-05-30	3	0	11	36	0	0	0	0	0	0	0	31	0	0	0	0	0	0	0	0	0	0	0	0	0	0	0	0	0
166A3	3	Ste Therese Analamiranga	2003-05-30	3	0	11	36.9	0	0	0	0	0	0	0	24	0	0	0	0	0	0	0	0	0	0	0	0	0	0	0	0	0
167A3	3	Ste Therese Analamiranga	2003-05-30	3	0	10	37.7	1	0	0	0	0	0	0	21	0	0	0	0	0	0	0	0	0	0	0	0	0	0	0	0	0
168A3	3	Ste Therese Analamiranga	2003-05-30	3	0	11	36.6	0	0	0	0	0	0	0	28	1	823.52	0	0	0	0	0	0	0	0	0	0	0	0	0	0	1
169A3	3	Ste Therese Analamiranga	2003-05-30	3	0	12	36.8	0	0	0	0	0	0	0	30	0	0	0	0	0	0	0	0	0	0	0	0	0	0	0	0	0
170A3	3	Ste Therese Analamiranga	2003-05-30	3	0	11	37.1	1	0	0	0	0	0	0	31	0	0	0	0	0	0	0	0	0	0	0	0	0	0	0	0	0
171A3	3	Ste Therese Analamiranga	2003-05-30	3	0	10	37.2	1	0	0	0	0	0	0	19	0	0	0	0	0	0	0	0	0	0	0	0	0	0	0	0	0
172A3	3	Ste Therese Analamiranga	2003-05-30	3	0	11	37.1	1	0	0	0	0	0	0	25	0	0	0	0	0	0	0	0	0	0	0	0	0	0	0	0	0
173A3	3	Ste Therese Analamiranga	2003-05-30	3	0	9	36	0	0	0	0	0	0	0	22	1	171.53	0	0	0	0	0	0	0	0	0	0	1	93.56	0	0	1
174A3	3	Ste Therese Analamiranga	2003-05-30	3	0	12	36.6	0	0	0	0	0	0	0	27	0	0	0	0	0	0	0	0	0	0	0	0	0	0	0	0	0
175A3	3	Ste Therese Analamiranga	2003-05-30	3	0	11	36.7	0	0	0	0	0	0	0	25	0	0	0	0	0	0	0	0	0	0	0	0	1	730.59	1	16	1
176A3	3	Ste Therese Analamiranga	2003-05-30	3	0	9	36.5	0	0	0	0	0	0	2	20	1	415.09	0	0	0	0	0	0	0	0	0	0	0	0	0	0	1
177A3	3	Ste Therese Analamiranga	2003-05-30	3	0	7	37.2	1	0	0	0	0	0	0	16	0	0	0	0	0	0	0	0	0	0	0	0	0	0	0	0	0
178A3	3	Ste Therese Analamiranga	2003-05-30	3	0	6	37.7	1	0	0	0	0	0	0	15	0	0	0	0	0	0	0	0	0	0	0	0	0	0	0	0	0
179A3	3	Ste Therese Analamiranga	2003-05-30	3	0	6	37.6	1	0	0	0	0	0	0	17	0	0	0	0	0	0	0	0	0	0	0	0	0	0	0	0	0
180A3	3	Ste Therese Analamiranga	2003-05-30	3	0	12	36.6	0	0	0	0	0	0	0	30	1	723.8	0	0	0	0	0	0	0	0	0	0	0	0	0	0	1
181A3	3	Ste Therese Analamiranga	2003-05-30	3	0	7	36.6	0	0	0	0	0	0	0	20	0	0	0	0	0	0	0	0	0	0	0	0	0	0	0	0	0
182A3	3	Ste Therese Analamiranga	2003-05-30	3	0	6	36.6	0	0	0	0	0	0	0	18	0	0	0	0	0	0	0	0	0	0	0	0	0	0	0	0	0
183A3	3	Ste Therese Analamiranga	2003-05-30	3	0	7	37.6	1	1	0	0	0	1	0	18	1	652	0	0	0	0	0	0	0	0	0	0	0	0	0	0	1
184A3	3	Ste Therese Analamiranga	2003-05-30	3	1	6	37.7	1	1	0	0	1	1	0	16	1	249.02	0	0	0	0	0	0	0	0	0	0	1	513.61	0	0	1
185A3	3	Ste Therese Analamiranga	2003-05-30	3	0	7	37	1	0	0	0	0	0	0	22	0	0	0	0	0	0	0	0	0	0	0	0	0	0	0	0	0
186A3	3	Ste Therese Analamiranga	2003-05-30	3	1	6	37.1	1	1	0	0	1	1	0	19	1	249	0	0	0	0	0	0	0	0	0	0	1	514	0	0	1
187A3	3	Ste Therese Analamiranga	2003-05-30	3	1	8	36.9	0	0	0	0	0	0	0	18	0	0	0	0	0	0	0	0	0	0	0	0	1	207.37	0	0	1
188A3	3	Ste Therese Analamiranga	2003-05-30	3	1	8	37.9	1	1	0	0	0	1	0	17	1	14217.82	0	0	0	0	0	0	0	0	0	0	0	0	0	0	1
189A3	3	Ste Therese Analamiranga	2003-05-30	3	1	6	36.7	0	0	0	0	0	0	0	20	0	0	0	0	0	0	0	0	0	0	0	0	1	528.62	1	32	1
190A3	3	Ste Therese Analamiranga	2003-05-30	3	1	7	37.2	1	0	0	0	0	0	0	20	0	0	0	0	0	0	0	0	0	0	0	0	0	0	0	0	0
191A3	3	Ste Therese Analamiranga	2003-05-30	3	1	7	38.2	1	1	0	0	0	1	0	20	1	1185.18	0	0	0	0	0	0	0	0	0	0	0	0	0	0	1
192A3	3	Ste Therese Analamiranga	2003-05-30	3	1	8	36.9	0	0	0	0	0	0	0	17	1	15.9	0	0	0	0	0	0	0	0	0	0	0	0	0	0	1
193A3	3	Ste Therese Analamiranga	2003-05-30	3	1	10	36.7	0	0	0	0	0	0	0	25	1	31.55	0	0	0	0	0	0	0	0	0	0	0	0	0	0	1
194A3	3	Ste Therese Analamiranga	2003-05-30	3	1	10	37.7	1	1	0	0	1	1	0	29	1	155.94	0	0	0	0	0	0	0	0	0	0	1	985.22	0	0	1
195A3	3	Ste Therese Analamiranga	2003-05-30	3	1	12	36.5	0	0	0	0	0	0	0	33	0	0	1	47.8	0	0	0	0	0	0	0	0	0	0	0	0	1
196A3	3	Ste Therese Analamiranga	2003-05-30	3	1	6	37.5	1	1	0	0	0	1	0	17	1	29.68	1	14.84	0	0	0	0	0	0	0	0	0	0	0	0	1
197A3	3	Ste Therese Analamiranga	2003-05-30	3	1	7	37.9	1	1	0	0	0	1	0	15	1	706.97	1	31.12	0	0	0	0	0	0	0	0	0	0	0	0	1
198A3	3	Ste Therese Analamiranga	2003-05-30	3	1	12	37.1	1	0	0	0	0	0	2	25	0	0	0	0	0	0	0	0	0	0	0	0	0	0	0	0	0
199A3	3	Ste Therese Analamiranga	2003-05-30	3	1	6	36.3	0	0	0	0	0	0	0	32	1	2019.6	1	15.87	0	0	0	0	0	0	0	0	0	0	0	0	1
200A3	3	Ste Therese Analamiranga	2003-05-30	3	1	8	36.9	0	0	0	0	0	0	0	21	0	0	0	0	0	0	0	0	0	0	0	0	0	0	0	0	0
201A3	3	Ste Therese Analamiranga	2003-05-30	3	1	8	36.9	0	0	0	0	0	0	0	19	0	0	0	0	0	0	0	0	0	0	0	0	0	0	0	0	0
202S3	3	Ste Therese Analamiranga	2003-05-30	3	1	12	37.1	1	0	0	0	0	0	2	27	0	0	0	0	0	0	0	0	0	0	0	0	0	0	0	0	0
203S3	3	Ste Therese Analamiranga	2003-05-30	3	1	7	36.7	0	0	0	0	0	0	0	16	1	47.52	1	95.4	0	0	0	0	0	0	0	0	0	0	0	0	1
204A3	3	Ste Therese Analamiranga	2003-05-30	3	1	8	38.5	1	0	0	0	0	0	0	21	0	0	0	0	0	0	0	0	0	0	0	0	0	0	0	0	0
205A3	3	Ste Therese Analamiranga	2003-05-30	3	1	8	37.6	1	1	0	0	0	1	0	21	1	429.26	0	0	0	0	0	0	0	0	0	0	0	0	0	0	1
206S3	3	Ste Therese Analamiranga	2003-05-30	3	1	10	36.5	0	0	0	0	0	0	0	25	1	255.48	0	0	0	0	0	0	0	0	0	0	0	0	0	0	1
207S3	3	Ste Therese Analamiranga	2003-05-30	3	1	10	36.5	0	0	0	0	0	0	0	25	1	156.86	1	15.58	0	0	0	0	0	0	0	0	0	0	0	0	1
208S3	3	Ste Therese Analamiranga	2003-05-30	3	1	8	36.9	0	0	0	0	0	0	0	25	0	0	0	0	0	0	0	0	0	0	0	0	1	110.67	0	0	1
209S3	3	Ste Therese Analamiranga	2003-05-30	3	1	7	36.3	0	0	0	0	0	0	0	17	0	0	0	0	0	0	0	0	0	0	0	0	1	30.76	0	0	1
210S3	3	Ste Therese Analamiranga	2003-05-30	3	1	8	36.8	0	0	0	0	0	0	0	23	0	0	0	0	0	0	0	0	0	0	0	0	1	31.37	0	0	1
211S3	3	Ste Therese Analamiranga	2003-05-30	3	1	8	36.3	0	0	0	0	0	0	0	20	0	0	0	0	0	0	0	0	0	0	0	0	0	0	0	0	0
212S3	3	Ste Therese Analamiranga	2003-05-30	3	1	9	36.8	0	0	0	0	0	0	0	20	1	64	0	0	0	0	0	0	0	0	0	0	0	0	0	0	1
213S3	3	Ste Therese Analamiranga	2003-05-30	3	1	11	37.1	1	1	0	0	0	1	0	27	1	792.45	1	16	0	0	0	0	0	0	0	0	0	0	0	0	1
214S3	3	Ste Therese Analamiranga	2003-05-30	3	0	9	37.1	1	1	0	0	0	1	0	22	1	31.18	0	0	0	0	0	0	0	0	0	0	0	0	0	0	1
215S3	3	Ste Therese Analamiranga	2003-05-30	3	0	9	36.9	0	0	0	0	0	0	0	22	1	900.9	0	0	0	0	0	0	0	0	0	0	0	0	0	0	1
1S4	2	EPP Andranonahoatra	2003-09-23	4	1	12	36.7	0	0	0	0	0	0	0	25	0	0	0	0	0	0	0	0	0	0	0	0	0	0	0	0	0
2S4	2	EPP Andranonahoatra	2003-09-23	4	1	11	36.7	0	0	0	0	0	0	0	25	0	0	0	0	0	0	0	0	0	0	0	0	0	0	0	0	0
3S4	2	EPP Andranonahoatra	2003-09-23	4	1	11	36.5	0	0	0	0	0	0	0	34	0	0	0	0	0	0	0	0	0	0	0	0	0	0	0	0	0
4S4	2	EPP Andranonahoatra	2003-09-23	4	0	12	36.6	0	0	0	0	0	0	0	34	0	0	0	0	0	0	0	0	0	0	0	0	0	0	0	0	0
5S4	2	EPP Andranonahoatra	2003-09-23	4	0	11	36.2	0	0	0	0	0	0	0	20	0	0	0	0	0	0	0	0	0	0	0	0	0	0	0	0	0
6S4	2	EPP Andranonahoatra	2003-09-23	4	0	12	36.7	0	0	0	0	0	0	0	25	0	0	0	0	0	0	0	0	0	0	0	0	0	0	0	0	0
7S4	2	EPP Andranonahoatra	2003-09-23	4	0	11	36.3	0	0	0	0	0	0	0	30	0	0	0	0	0	0	0	0	0	0	0	0	0	0	0	0	0
8S4	2	EPP Andranonahoatra	2003-09-23	4	1	11	36.4	0	0	0	0	0	0	0	25	0	0	0	0	0	0	0	0	0	0	0	0	0	0	0	0	0
9S4	2	EPP Andranonahoatra	2003-09-23	4	0	8	36.9	0	0	0	0	0	0	0	25	0	0	0	0	0	0	0	0	0	0	0	0	0	0	0	0	0
10S4	2	EPP Andranonahoatra	2003-09-23	4	0	7	37.3	1	0	0	0	0	0	0	20	0	0	0	0	0	0	0	0	0	0	0	0	0	0	0	0	0
11S4	2	EPP Andranonahoatra	2003-09-23	4	0	9	36.5	0	0	0	0	0	0	0	16	0	0	0	0	0	0	0	0	0	0	0	0	0	0	0	0	0
12S4	2	EPP Andranonahoatra	2003-09-23	4	1	8	36.3	0	0	0	0	0	0	0	20	1	3354.83	0	0	0	0	0	0	0	0	0	0	1	15.87	0	0	1
13S4	2	EPP Andranonahoatra	2003-09-23	4	1	9	36.6	0	0	0	0	0	0	0	22	0	0	0	0	0	0	0	0	0	0	0	0	0	0	0	0	0
14S4	2	EPP Andranonahoatra	2003-09-23	4	0	6	36.8	0	0	0	0	0	0	0	19	0	0	0	0	0	0	0	0	0	0	0	0	0	0	0	0	0
15S4	2	EPP Andranonahoatra	2003-09-23	4	1	8	36.7	0	0	0	0	0	0	0	19	0	0	0	0	0	0	0	0	0	0	0	0	0	0	0	0	0
16S4	2	EPP Andranonahoatra	2003-09-23	4	1	8	36.7	0	0	0	0	0	0	1	22	1	170.54	0	0	0	0	0	0	0	0	0	0	0	0	0	0	1
17S4	2	EPP Andranonahoatra	2003-09-23	4	0	7	37.3	1	0	0	0	0	0	0	19	0	0	0	0	0	0	0	0	0	0	0	0	0	0	0	0	0
18S4	2	EPP Andranonahoatra	2003-09-23	4	0	6	37.3	1	0	0	0	0	0	0	20	0	0	0	0	0	0	0	0	0	0	0	0	0	0	0	0	0
19S4	2	EPP Andranonahoatra	2003-09-23	4	0	8	36.7	0	0	0	0	0	0	0	21	0	0	0	0	0	0	0	0	0	0	0	0	0	0	0	0	0
20S4	2	EPP Andranonahoatra	2003-09-23	4	0	9	36.4	0	0	0	0	0	0	0	20	0	0	0	0	0	0	0	0	0	0	0	0	0	0	0	0	0
21S4	2	EPP Andranonahoatra	2003-09-23	4	1	9	37.6	1	0	0	0	0	0	0	20	0	0	0	0	0	0	0	0	0	0	0	0	0	0	0	0	0
22S4	2	EPP Andranonahoatra	2003-09-23	4	0	8	37.2	1	0	0	0	0	0	0	22	0	0	0	0	0	0	0	0	0	0	0	0	0	0	0	0	0
23S4	2	EPP Andranonahoatra	2003-09-23	4	1	7	37.1	1	0	0	0	0	0	3	19	0	0	0	0	0	0	0	0	0	0	0	0	0	0	0	0	0
24S4	2	EPP Andranonahoatra	2003-09-23	4	0	9	36.9	0	0	0	0	0	0	0	22	0	0	0	0	0	0	0	0	0	0	0	0	0	0	0	0	0
25S4	2	EPP Andranonahoatra	2003-09-23	4	0	8	37.5	1	0	0	0	0	0	0	23	0	0	0	0	0	0	0	0	0	0	0	0	0	0	0	0	0
26S4	2	EPP Andranonahoatra	2003-09-23	4	0	8	36	0	0	0	0	0	0	0	20	0	0	0	0	0	0	0	0	0	0	0	0	0	0	0	0	0
27S4	2	EPP Andranonahoatra	2003-09-23	4	0	7	36.9	0	0	0	0	0	0	0	22	0	0	0	0	0	0	0	0	0	0	0	0	0	0	0	0	0
28S4	2	EPP Andranonahoatra	2003-09-23	4	0	9	37.1	1	0	0	0	0	0	0	21	0	0	0	0	0	0	0	0	0	0	0	0	0	0	0	0	0
29S4	2	EPP Andranonahoatra	2003-09-23	4	0	7	37.3	1	0	0	0	0	0	0	22	0	0	0	0	0	0	0	0	0	0	0	0	0	0	0	0	0
30S4	2	EPP Andranonahoatra	2003-09-23	4	0	6	37.1	1	0	0	0	0	0	0	21	0	0	0	0	0	0	0	0	0	0	0	0	0	0	0	0	0
31S4	2	EPP Andranonahoatra	2003-09-23	4	1	8	36.9	0	0	0	0	0	0	0	19	0	0	0	0	0	0	0	0	0	0	0	0	0	0	0	0	0
32S4	2	EPP Andranonahoatra	2003-09-23	4	0	7	36.6	0	0	0	0	0	0	0	18	0	0	0	0	0	0	0	0	0	0	0	0	0	0	0	0	0
33S4	2	EPP Andranonahoatra	2003-09-23	4	1	11	37.4	1	0	0	0	0	0	0	26	0	0	0	0	0	0	0	0	0	0	0	0	0	0	0	0	0
34S4	2	EPP Andranonahoatra	2003-09-23	4	1	11	36.6	0	0	0	0	0	0	3	29	0	0	0	0	0	0	0	0	0	0	0	0	0	0	0	0	0
35S4	2	EPP Andranonahoatra	2003-09-23	4	1	8	37	1	0	0	0	0	0	0	22	0	0	0	0	0	0	0	0	0	0	0	0	0	0	0	0	0
36S4	2	EPP Andranonahoatra	2003-09-23	4	1	9	36.5	0	0	0	0	0	0	0	20	0	0	1	16	0	0	0	0	0	0	0	0	0	0	0	0	1
37S4	2	EPP Andranonahoatra	2003-09-23	4	0	10	37.5	1	0	0	0	0	0	0	20	0	0	0	0	0	0	0	0	0	0	0	0	0	0	0	0	0
38S4	2	EPP Andranonahoatra	2003-09-23	4	0	10	36.7	0	0	0	0	0	0	0	28	0	0	0	0	0	0	0	0	0	0	0	0	0	0	0	0	0
39S4	2	EPP Andranonahoatra	2003-09-23	4	0	9	36.9	0	0	0	0	0	0	0	23	0	0	0	0	0	0	0	0	0	0	0	0	0	0	0	0	0
40S4	2	EPP Andranonahoatra	2003-09-23	4	1	11	36.7	0	0	0	0	0	0	0	28	0	0	0	0	0	0	0	0	0	0	0	0	0	0	0	0	0
41S4	2	EPP Andranonahoatra	2003-09-23	4	0	8	36.1	0	0	0	0	0	0	0	25	0	0	0	0	0	0	0	0	0	0	0	0	0	0	0	0	0
42S4	2	EPP Andranonahoatra	2003-09-23	4	1	11	36.7	0	0	0	0	0	0	0	25	0	0	0	0	0	0	0	0	0	0	0	0	0	0	0	0	0
43S4	2	EPP Andranonahoatra	2003-09-23	4	0	8	37.1	1	0	0	0	0	0	0	24	0	0	0	0	0	0	0	0	0	0	0	0	0	0	0	0	0
44S4	2	EPP Andranonahoatra	2003-09-23	4	0	9	36.9	0	0	0	0	0	0	0	22	0	0	0	0	0	0	0	0	0	0	0	0	0	0	0	0	0
45S4	2	EPP Andranonahoatra	2003-09-23	4	0	7	37	1	0	0	0	0	0	0	19	0	0	0	0	0	0	0	0	0	0	0	0	0	0	0	0	0
46S4	2	EPP Andranonahoatra	2003-09-23	4	0	9	36.7	0	0	0	0	0	0	0	24	0	0	0	0	0	0	0	0	0	0	0	0	0	0	0	0	0
47S4	2	EPP Andranonahoatra	2003-09-23	4	1	10	36.8	0	0	0	0	0	0	0	19	0	0	0	0	0	0	0	0	0	0	0	0	0	0	0	0	0
48S4	2	EPP Andranonahoatra	2003-09-23	4	0	12	36.7	0	0	0	0	0	0	0	30	0	0	0	0	0	0	0	0	0	0	0	0	0	0	0	0	0
49S4	2	EPP Andranonahoatra	2003-09-23	4	0	11	37	1	0	0	0	0	0	0	29	0	0	0	0	0	0	0	0	0	0	0	0	0	0	0	0	0
50S4	2	EPP Andranonahoatra	2003-09-23	4	0	11	36.4	0	0	0	0	0	0	0	31	0	0	0	0	0	0	0	0	0	0	0	0	0	0	0	0	0
51S4	2	EPP Andranonahoatra	2003-09-23	4	0	11	36.7	0	0	0	0	0	0	0	29	0	0	0	0	0	0	0	0	0	0	0	0	0	0	0	0	0
52S4	2	EPP Andranonahoatra	2003-09-23	4	0	12	36.9	0	0	0	0	0	0	0	30	1	46.78	0	0	0	0	0	0	0	0	0	0	0	0	0	0	1
53S4	2	EPP Andranonahoatra	2003-09-23	4	0	10	36.4	0	0	0	0	0	0	0	25	0	0	0	0	0	0	0	0	0	0	0	0	0	0	0	0	0
54S4	2	EPP Andranonahoatra	2003-09-23	4	0	10	37.2	1	0	0	0	0	0	0	25	0	0	0	0	0	0	0	0	0	0	0	0	0	0	0	0	0
55S4	2	EPP Andranonahoatra	2003-09-23	4	0	12	36.9	0	0	0	0	0	0	0	39	0	0	0	0	0	0	0	0	0	0	0	0	0	0	0	0	0
56S4	2	EPP Andranonahoatra	2003-09-23	4	0	9	37.3	1	0	0	0	0	0	0	22	0	0	0	0	0	0	0	0	0	0	0	0	0	0	0	0	0
57S4	2	EPP Andranonahoatra	2003-09-23	4	1	11	36.9	0	0	0	0	0	0	0	26	0	0	0	0	0	0	0	0	0	0	0	0	0	0	0	0	0
58S4	2	EPP Andranonahoatra	2003-09-23	4	1	11	36	0	0	0	0	0	0	0	25	0	0	0	0	0	0	0	0	0	0	0	0	0	0	0	0	0
59S4	2	EPP Andranonahoatra	2003-09-23	4	0	10	37.2	1	0	0	0	0	0	0	28	0	0	0	0	0	0	0	0	0	0	0	0	0	0	0	0	0
60S4	2	EPP Andranonahoatra	2003-09-23	4	0	10	37	1	0	0	0	0	0	0	24	0	0	0	0	0	0	0	0	0	0	0	0	0	0	0	0	0
61S4	2	EPP Andranonahoatra	2003-09-23	4	1	12	37.2	1	0	0	0	0	0	0	32	0	0	0	0	0	0	0	0	0	0	0	0	0	0	0	0	0
62S4	2	EPP Andranonahoatra	2003-09-23	4	0	9	37.2	1	0	0	0	0	0	0	25	0	0	0	0	0	0	0	0	0	0	0	0	0	0	0	0	0
63S4	2	EPP Andranonahoatra	2003-09-23	4	0	9	36.8	0	0	0	0	0	0	0	21	1	80	0	0	0	0	0	0	0	0	0	0	0	0	0	0	1
64S4	2	EPP Andranonahoatra	2003-09-23	4	0	11	36.7	0	0	0	0	0	0	0	23	0	0	0	0	0	0	0	0	0	0	0	0	0	0	0	0	0
65S4	2	EPP Andranonahoatra	2003-09-23	4	1	10	36.9	0	0	0	0	0	0	0	25	0	0	0	0	0	0	0	0	0	0	0	0	0	0	0	0	0
66S4	2	EPP Andranonahoatra	2003-09-23	4	0	11	36.6	0	0	0	0	0	0	0	32	0	0	0	0	0	0	0	0	0	0	0	0	0	0	0	0	0
67S4	2	EPP Andranonahoatra	2003-09-23	4	0	10	36.9	0	0	0	0	0	0	0	19	0	0	0	0	0	0	0	0	0	0	0	0	0	0	0	0	0
68S4	2	EPP Andranonahoatra	2003-09-23	4	0	8	36.9	0	0	0	0	0	0	0	17	0	0	0	0	0	0	0	0	0	0	0	0	0	0	0	0	0
69S4	2	EPP Andranonahoatra	2003-09-23	4	1	11	36.7	0	0	0	0	0	0	0	25	1	96	0	0	0	0	0	0	0	0	0	0	0	0	0	0	1
70S4	2	EPP Andranonahoatra	2003-09-23	4	1	10	36.8	0	0	0	0	0	0	0	24	0	0	0	0	0	0	0	0	0	0	0	0	0	0	0	0	0
71S4	2	EPP Andranonahoatra	2003-09-23	4	1	12	37.5	1	0	0	0	0	0	0	30	0	0	0	0	0	0	0	0	0	0	0	0	0	0	0	0	0
72S4	2	EPP Andranonahoatra	2003-09-23	4	1	12	37.2	1	1	0	0	0	1	0	31	1	78.43	0	0	0	0	0	0	0	0	0	0	0	0	0	0	1
73S4	2	EPP Andranonahoatra	2003-09-23	4	1	8	36.3	0	0	0	0	0	0	0	20	0	0	0	0	0	0	0	0	0	0	0	0	0	0	0	0	0
74S4	2	EPP Andranonahoatra	2003-09-23	4	0	9	36.9	0	0	0	0	0	0	0	23	0	0	0	0	0	0	0	0	0	0	0	0	0	0	0	0	0
75S4	2	EPP Andranonahoatra	2003-09-23	4	1	12	37.1	1	0	0	0	0	0	0	29	0	0	0	0	0	0	0	0	0	0	0	0	0	0	0	0	0
76S4	2	EPP Andranonahoatra	2003-09-23	4	1	12	36.6	0	0	0	0	0	0	0	28	0	0	0	0	0	0	0	0	0	0	0	0	0	0	0	0	0
77S4	2	EPP Andranonahoatra	2003-09-23	4	1	10	36.8	0	0	0	0	0	0	0	28	0	0	0	0	0	0	0	0	0	0	0	0	0	0	0	0	0
78S4	2	EPP Andranonahoatra	2003-09-23	4	1	11	36.6	0	0	0	0	0	0	0	29	0	0	1	31.80	0	0	0	0	0	0	0	0	0	0	0	0	1
79S4	2	EPP Andranonahoatra	2003-09-23	4	1	12	37.3	1	0	0	0	0	0	0	29	0	0	0	0	0	0	0	0	0	0	0	0	0	0	0	0	0
80S4	2	EPP Andranonahoatra	2003-09-23	4	1	9	36.7	0	0	0	0	0	0	0	24	1	15.74	1	47.24	0	0	0	0	0	0	0	0	0	0	0	0	1
81S4	2	EPP Andranonahoatra	2003-09-23	4	1	10	36.9	0	0	0	0	0	0	0	30	1	96	0	0	0	0	0	0	0	0	0	0	0	0	0	0	1
82S4	2	EPP Andranonahoatra	2003-09-23	4	0	10	36.7	0	0	0	0	0	0	0	30	0	0	0	0	0	0	0	0	0	0	0	0	0	0	0	0	0
83S4	2	EPP Andranonahoatra	2003-09-23	4	1	10	37.5	1	0	0	0	0	0	0	31	0	0	0	0	0	0	0	0	0	0	0	0	0	0	0	0	0
84S4	2	EPP Andranonahoatra	2003-09-23	4	1	10	37.3	1	0	0	0	0	0	0	18	0	0	0	0	0	0	0	0	0	0	0	0	0	0	0	0	0
85S4	2	EPP Andranonahoatra	2003-09-23	4	1	10	36.7	0	0	0	0	0	0	0	25	0	0	0	0	0	0	0	0	0	0	0	0	0	0	0	0	0
86S4	2	EPP Andranonahoatra	2003-09-23	4	1	6	37.1	1	0	0	0	0	0	0	17	0	0	0	0	0	0	0	0	0	0	0	0	0	0	0	0	0
87S4	2	EPP Andranonahoatra	2003-09-23	4	1	6	36.8	0	0	0	0	0	0	0	18	0	0	0	0	0	0	0	0	0	0	0	0	0	0	0	0	0
88S4	2	EPP Andranonahoatra	2003-09-23	4	1	7	37.5	1	0	0	0	0	0	0	25	0	0	0	0	0	0	0	0	0	0	0	0	0	0	0	0	0
89S4	2	EPP Andranonahoatra	2003-09-23	4	1	7	36.8	0	0	0	0	0	0	0	25	0	0	0	0	0	0	0	0	0	0	0	0	0	0	0	0	0
90S4	2	EPP Andranonahoatra	2003-09-23	4	1	6	37.2	1	0	0	0	0	0	0	22	0	0	0	0	0	0	0	0	0	0	0	0	0	0	0	0	0
91S4	2	EPP Andranonahoatra	2003-09-23	4	1	6	37	1	0	0	0	0	0	0	20	0	0	0	0	0	0	0	0	0	0	0	0	0	0	0	0	0
92S4	2	EPP Andranonahoatra	2003-09-23	4	0	7	37.2	1	0	0	0	0	0	0	17	0	0	0	0	0	0	0	0	0	0	0	0	0	0	0	0	0
93S4	2	EPP Andranonahoatra	2003-09-23	4	0	8	37.1	1	0	0	0	0	0	0	18	0	0	0	0	0	0	0	0	0	0	0	0	0	0	0	0	0
94S4	2	EPP Andranonahoatra	2003-09-23	4	0	7	37.1	1	0	0	0	0	0	0	24	0	0	0	0	0	0	0	0	0	0	0	0	0	0	0	0	0
95S4	2	EPP Andranonahoatra	2003-09-23	4	0	7	36.7	0	0	0	0	0	0	0	18	0	0	0	0	0	0	0	0	0	0	0	0	0	0	0	0	0
96S4	2	EPP Andranonahoatra	2003-09-23	4	0	6	36.8	0	0	0	0	0	0	0	14	0	0	0	0	0	0	0	0	0	0	0	0	0	0	0	0	0
97S4	2	EPP Andranonahoatra	2003-09-23	4	0	6	37	1	0	0	0	0	0	0	15	0	0	0	0	0	0	0	0	0	0	0	0	0	0	0	0	0
98S4	2	EPP Andranonahoatra	2003-09-23	4	0	7	36.6	0	0	0	0	0	0	0	20	0	0	0	0	0	0	0	0	0	0	0	0	0	0	0	0	0
99S4	2	EPP Andranonahoatra	2003-09-23	4	0	7	36.7	0	0	0	0	0	0	0	23	1	47.43	0	0	0	0	0	0	0	0	0	0	0	0	0	0	1
100S4	2	EPP Andranonahoatra	2003-09-23	4	1	7	37.3	1	0	0	0	0	0	0	18	0	0	0	0	0	0	0	0	0	0	0	0	0	0	0	0	0
101S4	2	EPP Andranonahoatra	2003-09-23	4	0	7	36.8	0	0	0	0	0	0	0	19	0	0	0	0	0	0	0	0	0	0	0	0	0	0	0	0	0
102S4	2	EPP Andranonahoatra	2003-09-23	4	0	6	36.6	0	0	0	0	0	0	0	15	0	0	0	0	0	0	0	0	0	0	0	0	0	0	0	0	0
103S4	2	EPP Andranonahoatra	2003-09-23	4	1	10	36.6	0	0	0	0	0	0	0	22	0	0	0	0	0	0	0	0	0	0	0	0	0	0	0	0	0
104S4	2	EPP Andranonahoatra	2003-09-23	4	1	8	36.8	0	0	0	0	0	0	0	19	0	0	0	0	0	0	0	0	0	0	0	0	0	0	0	0	0
105S4	2	EPP Andranonahoatra	2003-09-23	4	0	12	37	1	0	0	0	0	0	0	22	0	0	0	0	0	0	0	0	0	0	0	0	0	0	0	0	0
106S4	2	EPP Soamihary	2003-09-24	4	0	6	36.9	0	0	0	0	0	0	0	16	0	0	0	0	0	0	0	0	0	0	0	0	0	0	0	0	0
107S4	2	EPP Soamihary	2003-09-24	4	0	6	36.7	0	0	0	0	0	0	0	15	0	0	0	0	0	0	0	0	0	0	0	0	0	0	0	0	0
108S4	2	EPP Soamihary	2003-09-24	4	0	7	37.3	1	0	0	0	0	0	0	15	0	0	0	0	0	0	0	0	0	0	0	0	0	0	0	0	0
109S4	2	EPP Soamihary	2003-09-24	4	0	8	37	1	1	0	0	0	1	0	18	1	1022.83	0	0	0	0	0	0	0	0	0	0	0	0	0	0	1
110S4	2	EPP Soamihary	2003-09-24	4	0	10	36.9	0	0	0	0	0	0	0	21	0	0	0	0	0	0	0	0	0	0	0	0	0	0	0	0	0
111S4	2	EPP Soamihary	2003-09-24	4	0	8	37.4	1	0	0	0	0	0	0	17	0	0	0	0	0	0	0	0	0	0	0	0	0	0	0	0	0
112S4	2	EPP Soamihary	2003-09-24	4	0	6	37.2	1	0	0	0	0	0	0	19	0	0	0	0	0	0	0	0	0	0	0	0	0	0	0	0	0
113S4	2	EPP Soamihary	2003-09-24	4	0	8	37	1	0	0	0	0	0	0	20	0	0	0	0	0	0	0	0	0	0	0	0	0	0	0	0	0
114S4	2	EPP Soamihary	2003-09-24	4	0	8	37.5	1	0	0	0	0	0	0	19	0	0	0	0	0	0	0	0	0	0	0	0	0	0	0	0	0
115S4	2	EPP Soamihary	2003-09-24	4	0	7	37.5	1	0	0	0	1	1	0	18	0	0	0	0	0	0	0	0	0	0	0	0	1	91.77	0	0	1
116S4	2	EPP Soamihary	2003-09-24	4	0	6	37.5	1	0	0	0	0	0	0	20	0	0	0	0	0	0	0	0	0	0	0	0	0	0	0	0	0
117S4	2	EPP Soamihary	2003-09-24	4	0	7	37.7	1	0	0	0	0	0	0	15	0	0	0	0	0	0	0	0	0	0	0	0	0	0	0	0	0
118S4	2	EPP Soamihary	2003-09-24	4	1	6	37.3	1	0	0	0	0	0	0	19	0	0	0	0	0	0	0	0	0	0	0	0	0	0	0	0	0
119S4	2	EPP Soamihary	2003-09-24	4	1	6	36.8	0	0	0	0	0	0	0	17	1	238.09	0	0	0	0	0	0	0	0	0	0	0	0	0	0	1
120S4	2	EPP Soamihary	2003-09-24	4	1	7	37.2	1	0	0	0	0	0	0	20	0	0	0	0	0	0	0	0	0	0	0	0	0	0	0	0	0
121S4	2	EPP Soamihary	2003-09-24	4	1	7	37.3	1	0	0	0	0	0	0	20	0	0	0	0	0	0	0	0	0	0	0	0	0	0	0	0	0
122S4	2	EPP Soamihary	2003-09-24	4	1	7	36.9	0	0	0	0	0	0	0	17	1	189.72	0	0	0	0	0	0	0	0	0	0	0	0	0	0	1
123S4	2	EPP Soamihary	2003-09-24	4	1	7	37.3	1	0	0	0	0	0	0	18	0	0	0	0	0	0	0	0	0	0	0	0	0	0	0	0	0
124S4	2	EPP Soamihary	2003-09-24	4	1	8	37.1	1	0	0	0	0	0	0	18	0	0	0	0	0	0	0	0	0	0	0	0	0	0	0	0	0
125S4	2	EPP Soamihary	2003-09-24	4	1	8	37.3	1	0	0	0	0	0	0	20	0	0	0	0	0	0	0	0	0	0	0	0	0	0	0	0	0
126S4	2	EPP Soamihary	2003-09-24	4	1	7	37.1	1	0	0	0	0	0	0	16	0	0	0	0	0	0	0	0	0	0	0	0	0	0	0	0	0
127S4	2	EPP Soamihary	2003-09-24	4	1	7	37.6	1	0	0	0	0	0	0	19	0	0	0	0	0	0	0	0	0	0	0	0	0	0	0	0	0
128S4	2	EPP Soamihary	2003-09-24	4	1	6	37.1	1	0	0	0	0	0	0	16	0	0	0	0	0	0	0	0	0	0	0	0	0	0	0	0	0
129S4	2	EPP Soamihary	2003-09-24	4	1	6	36.9	0	0	0	0	0	0	0	20	0	0	0	0	0	0	0	0	0	0	0	0	0	0	0	0	0
130S4	2	EPP Soamihary	2003-09-24	4	1	7	36.6	0	0	0	0	0	0	0	21	0	0	0	0	0	0	0	0	0	0	0	0	1	141.73	0	0	1
131S4	2	EPP Soamihary	2003-09-24	4	1	8	37.5	1	0	0	0	0	0	2	24	0	0	0	0	0	0	0	0	0	0	0	0	0	0	0	0	0
132S4	2	EPP Soamihary	2003-09-24	4	1	7	36	0	0	0	0	0	0	0	22	0	0	0	0	0	0	0	0	0	0	0	0	0	0	0	0	0
133S4	2	EPP Soamihary	2003-09-24	4	1	8	37.6	1	1	0	0	0	1	3	18	1	217.89	1	15.56	0	0	0	0	0	0	0	0	0	0	0	0	1
134S4	2	EPP Soamihary	2003-09-24	4	1	8	37.3	1	0	0	0	0	0	0	20	0	0	0	0	0	0	0	0	0	0	0	0	0	0	0	0	0
135S4	2	EPP Soamihary	2003-09-24	4	1	10	36.5	0	0	0	0	0	0	0	21	0	0	0	0	0	0	0	0	0	0	0	0	0	0	0	0	0
136S4	2	EPP Soamihary	2003-09-24	4	1	8	37.3	1	0	0	0	0	0	0	18	0	0	0	0	0	0	0	0	0	0	0	0	0	0	0	0	0
137S4	2	EPP Soamihary	2003-09-24	4	1	10	37.2	1	0	0	0	0	0	0	22	0	0	0	0	0	0	0	0	0	0	0	0	0	0	0	0	0
138S4	2	EPP Soamihary	2003-09-24	4	1	7	36.9	0	0	0	0	0	0	0	18	1	680	1	46.60	0	0	0	0	0	0	0	0	0	0	0	0	1
139S4	2	EPP Soamihary	2003-09-24	4	1	7	36.6	0	0	0	0	0	0	3	18	0	0	0	0	0	0	0	0	0	0	0	0	0	0	0	0	0
140S4	2	EPP Soamihary	2003-09-24	4	1	10	37.1	1	0	0	0	0	0	0	25	0	0	0	0	0	0	0	0	0	0	0	0	0	0	0	0	0
141S4	2	EPP Soamihary	2003-09-24	4	1	10	36.8	0	0	0	0	0	0	0	22	1	120.98	0	0	0	0	0	0	0	0	0	0	0	0	0	0	1
142S4	2	EPP Soamihary	2003-09-24	4	0	8	37.5	1	0	0	0	0	0	0	15	0	0	0	0	0	0	0	0	0	0	0	0	0	0	0	0	0
143S4	2	EPP Soamihary	2003-09-24	4	0	8	36	0	0	0	0	0	0	0	18	0	0	0	0	0	0	0	0	0	0	0	0	0	0	0	0	0
144S4	2	EPP Soamihary	2003-09-24	4	0	7	37.6	1	0	0	0	1	1	0	16	0	0	0	0	0	0	0	0	0	0	0	0	1	452.83	0	0	1
145S4	2	EPP Soamihary	2003-09-24	4	0	8	36.7	0	0	0	0	0	0	0	15	1	15.96	0	0	0	0	0	0	0	0	0	0	0	0	0	0	1
146S4	2	EPP Soamihary	2003-09-24	4	0	8	36.9	0	0	0	0	0	0	0	19	0	0	0	0	0	0	0	0	0	0	0	0	0	0	0	0	0
147S4	2	EPP Soamihary	2003-09-24	4	0	7	36.6	0	0	0	0	0	0	0	17	0	0	0	0	0	0	0	0	0	0	0	0	0	0	0	0	0
148S4	2	EPP Soamihary	2003-09-24	4	0	8	37.2	1	0	0	0	0	0	0	20	0	0	0	0	0	0	0	0	0	0	0	0	0	0	0	0	0
149S4	2	EPP Soamihary	2003-09-24	4	0	7	36.1	0	0	0	0	0	0	0	18	0	0	0	0	0	0	0	0	0	0	0	0	0	0	0	0	0
150S4	2	EPP Soamihary	2003-09-24	4	0	9	37.5	1	0	0	0	0	0	0	18	0	0	0	0	0	0	0	0	0	0	0	0	0	0	0	0	0
151S4	2	EPP Soamihary	2003-09-24	4	0	8	37.7	1	1	0	0	0	1	0	20	1	348.51	0	0	0	0	0	0	0	0	0	0	0	0	0	0	1
152S4	2	EPP Soamihary	2003-09-24	4	0	8	37.5	1	0	0	0	0	0	0	18	0	0	0	0	0	0	0	0	0	0	0	0	0	0	0	0	0
153S4	2	EPP Soamihary	2003-09-24	4	0	10	37.6	1	1	0	0	0	1	0	20	1	611.57	0	0	0	0	0	0	0	0	0	0	0	0	0	0	1
154S4	2	EPP Soamihary	2003-09-24	4	0	10	37.6	1	0	0	0	0	0	0	25	0	0	0	0	0	0	0	0	0	0	0	0	0	0	0	0	0
155S4	2	EPP Soamihary	2003-09-24	4	1	8	36.7	0	0	0	0	0	0	0	18	0	0	0	0	0	0	0	0	0	0	0	0	1	47.52	0	0	1
156S4	2	EPP Soamihary	2003-09-24	4	1	9	36.4	0	0	0	0	0	0	0	21	0	0	0	0	0	0	0	0	0	0	0	0	0	0	0	0	0
157S4	2	EPP Soamihary	2003-09-24	4	0	10	36.8	0	0	0	0	0	0	0	26	0	0	0	0	0	0	0	0	0	0	0	0	0	0	0	0	0
158S4	2	EPP Soamihary	2003-09-24	4	1	10	36.7	0	0	0	0	0	0	0	25	0	0	0	0	0	0	0	0	0	0	0	0	0	0	0	0	0
159S4	2	EPP Soamihary	2003-09-24	4	1	10	37.1	1	1	0	0	0	1	0	25	1	62.86	0	0	0	0	0	0	0	0	0	0	0	0	0	0	1
160S4	2	EPP Soamihary	2003-09-24	4	1	9	36.5	0	0	0	0	0	0	0	25	1	47.90	0	0	0	0	0	0	0	0	0	0	0	0	0	0	1
161S4	2	EPP Soamihary	2003-09-24	4	1	9	37.2	1	0	0	0	0	0	0	20	0	0	1	31.18	0	0	0	0	0	0	0	0	0	0	0	0	1
162S4	2	EPP Soamihary	2003-09-24	4	1	10	37.2	1	0	0	0	0	0	0	24	0	0	0	0	0	0	0	0	0	0	0	0	0	0	0	0	0
163S4	2	EPP Soamihary	2003-09-24	4	0	10	37.1	1	0	0	0	0	0	0	22	0	0	0	0	0	0	0	0	0	0	0	0	0	0	0	0	0
164S4	2	EPP Soamihary	2003-09-24	4	0	9	36.5	0	0	0	0	0	0	0	24	0	0	0	0	0	0	0	0	0	0	0	0	0	0	0	0	0
165S4	2	EPP Soamihary	2003-09-24	4	1	8	37.5	1	0	0	0	0	0	0	20	0	0	0	0	0	0	0	0	0	0	0	0	0	0	0	0	0
166S4	2	EPP Soamihary	2003-09-24	4	1	10	37.4	1	0	0	0	0	0	0	21	0	0	0	0	0	0	0	0	0	0	0	0	0	0	0	0	0
167S4	2	EPP Soamihary	2003-09-24	4	0	10	36.3	0	0	0	0	0	0	0	24	1	792.07	0	0	0	0	0	0	0	0	0	0	0	0	0	0	1
168S4	2	EPP Soamihary	2003-09-24	4	1	10	36.9	0	0	0	0	0	0	0	19	0	0	0	0	0	0	0	0	0	0	0	0	0	0	0	0	0
169S4	2	EPP Soamihary	2003-09-24	4	0	8	36.9	0	0	0	0	0	0	0	19	1	1843.31	1	15.87	0	0	0	0	0	0	0	0	0	0	0	0	1
170S4	2	EPP Soamihary	2003-09-24	4	0	9	36.9	0	0	0	0	0	0	0	20	0	0	0	0	0	0	0	0	0	0	0	0	0	0	0	0	0
171S4	2	EPP Soamihary	2003-09-24	4	0	9	37.2	1	0	0	0	0	0	0	20	0	0	0	0	0	0	0	0	0	0	0	0	0	0	0	0	0
172S4	2	EPP Soamihary	2003-09-24	4	0	9	37.2	1	0	0	0	0	0	0	18	0	0	0	0	0	0	0	0	0	0	0	0	0	0	0	0	0
173S4	2	EPP Soamihary	2003-09-24	4	1	10	37	1	0	0	0	0	0	0	24	0	0	0	0	0	0	0	0	0	0	0	0	0	0	0	0	0
174S4	2	EPP Soamihary	2003-09-24	4	1	8	37.3	1	1	0	0	0	1	0	19	1	95.23	0	0	0	0	0	0	0	0	0	0	0	0	0	0	1
175S4	2	EPP Soamihary	2003-09-24	4	1	10	36.9	0	0	0	0	0	0	0	26	0	0	0	0	0	0	0	0	0	0	0	0	1	15.87	0	0	1
176S4	2	EPP Soamihary	2003-09-24	4	1	10	36.8	0	0	0	0	0	0	0	19	0	0	0	0	0	0	0	0	0	0	0	0	0	0	0	0	0
177S4	2	EPP Soamihary	2003-09-24	4	1	10	37.2	1	0	0	0	0	0	2	24	0	0	0	0	0	0	0	0	0	0	0	0	0	0	0	0	0
178S4	2	EPP Soamihary	2003-09-24	4	0	10	36.7	0	0	0	0	0	0	0	24	1	62.99	0	0	0	0	0	0	0	0	0	0	0	0	0	0	1
179S4	2	EPP Soamihary	2003-09-24	4	0	9	37.5	1	0	0	0	0	0	0	18	0	0	0	0	0	0	0	0	0	0	0	0	0	0	0	0	0
180S4	2	EPP Soamihary	2003-09-24	4	0	9	37	1	0	0	0	0	0	0	28	0	0	0	0	0	0	0	0	0	0	0	0	0	0	0	0	0
181S4	2	EPP Soamihary	2003-09-24	4	0	12	37.3	1	1	0	0	0	1	0	30	1	63.11	0	0	0	0	0	0	0	0	0	0	0	0	0	0	1
182S4	2	EPP Soamihary	2003-09-24	4	0	12	37.1	1	0	0	0	0	0	0	24	0	0	0	0	0	0	0	0	0	0	0	0	0	0	0	0	0
183S4	2	EPP Soamihary	2003-09-24	4	0	8	37.1	1	0	0	0	0	0	0	18	0	0	0	0	0	0	0	0	0	0	0	0	0	0	0	0	0
184S4	2	EPP Soamihary	2003-09-24	4	0	10	37.4	1	0	0	0	0	0	0	22	0	0	0	0	0	0	0	0	0	0	0	0	0	0	0	0	0
185S4	2	EPP Soamihary	2003-09-24	4	0	10	37.1	1	1	0	0	0	1	0	25	1	15.71	0	0	0	0	0	0	0	0	0	0	0	0	0	0	1
186S4	2	EPP Soamihary	2003-09-24	4	0	11	36.7	0	0	0	0	0	0	0	26	0	0	0	0	0	0	0	0	0	0	0	0	0	0	0	0	0
187S4	2	EPP Soamihary	2003-09-24	4	0	10	36.8	0	0	0	0	0	0	0	25	0	0	0	0	0	0	0	0	0	0	0	0	0	0	0	0	0
188S4	2	EPP Soamihary	2003-09-24	4	0	11	36.8	0	0	0	0	0	0	0	26	0	0	0	0	0	0	0	0	0	0	0	0	0	0	0	0	0
189S4	2	EPP Soamihary	2003-09-24	4	0	9	36.7	0	0	0	0	0	0	0	25	0	0	0	0	0	0	0	0	0	0	0	0	0	0	0	0	0
190S4	2	EPP Soamihary	2003-09-24	4	0	10	37.8	1	0	0	0	0	0	0	25	0	0	0	0	0	0	0	0	0	0	0	0	0	0	0	0	0
191S4	2	EPP Soamihary	2003-09-24	4	0	11	36.4	0	0	0	0	0	0	0	30	0	0	0	0	0	0	0	0	0	0	0	0	0	0	0	0	0
192S4	2	EPP Soamihary	2003-09-24	4	0	8	37.8	1	0	0	0	1	1	0	22	0	0	0	0	0	0	0	0	0	0	0	0	1	126.48	1	15.81	1
193S4	2	EPP Soamihary	2003-09-24	4	1	10	37.5	1	0	0	0	1	1	0	24	0	0	0	0	0	0	0	0	0	0	0	0	1	32	0	0	1
194S4	2	EPP Soamihary	2003-09-24	4	1	10	37.1	1	0	0	0	0	0	0	25	0	0	0	0	0	0	0	0	0	0	0	0	0	0	0	0	0
195S4	2	EPP Soamihary	2003-09-24	4	1	10	37.3	1	0	0	0	0	0	0	22	0	0	0	0	0	0	0	0	0	0	0	0	0	0	0	0	0
196S4	2	EPP Soamihary	2003-09-24	4	1	12	36.6	0	0	0	0	0	0	0	26	0	0	0	0	0	0	0	0	0	0	0	0	0	0	0	0	0
197S4	2	EPP Soamihary	2003-09-24	4	1	11	36.8	0	0	0	0	0	0	0	25	0	0	0	0	0	0	0	0	0	0	0	0	0	0	0	0	0
198S4	2	EPP Soamihary	2003-09-24	4	1	11	36.6	0	0	0	0	0	0	0	25	0	0	0	0	0	0	0	0	0	0	0	0	0	0	0	0	0
199S4	2	EPP Soamihary	2003-09-24	4	1	12	36.8	0	0	0	0	0	0	2	25	1	157.48	0	0	0	0	0	0	0	0	0	0	0	0	0	0	1
200S4	2	EPP Soamihary	2003-09-24	4	1	12	37.1	1	0	0	0	0	0	0	25	0	0	0	0	0	0	0	0	0	0	0	0	0	0	0	0	0
201S4	2	EPP Soamihary	2003-09-24	4	1	12	37.5	1	0	0	0	0	0	0	29	0	0	0	0	0	0	0	0	0	0	0	0	0	0	0	0	0
202S4	2	EPP Soamihary	2003-09-24	4	1	11	36.8	0	0	0	0	0	0	0	27	0	0	0	0	0	0	0	0	0	0	0	0	0	0	0	0	0
203S4	2	EPP Soamihary	2003-09-24	4	1	9	37.1	1	0	0	0	0	0	0	23	0	0	0	0	0	0	0	0	0	0	0	0	0	0	0	0	0
204S4	2	EPP Soamihary	2003-09-24	4	1	10	36.6	0	0	0	0	0	0	0	27	0	0	1	15.81	0	0	0	0	0	0	0	0	0	0	0	0	1
205S4	2	EPP Soamihary	2003-09-24	4	0	9	37.1	1	0	0	0	0	0	0	20	0	0	0	0	0	0	0	0	0	0	0	0	0	0	0	0	0
206S4	2	EPP Soamihary	2003-09-24	4	0	8	37.2	1	0	0	0	0	0	0	20	0	0	0	0	0	0	0	0	0	0	0	0	0	0	0	0	0
1A4	3	Ste Therese Analamiranga	2003-09-25	4	0	9	37.3	1	0	0	0	0	0	0	20	0	0	0	0	0	0	0	0	0	0	0	0	0	0	0	0	0
2A4	3	Ste Therese Analamiranga	2003-09-25	4	0	6	37.1	1	0	0	0	0	0	0	16	0	0	0	0	0	0	0	0	0	0	0	0	0	0	0	0	0
3A4	3	Ste Therese Analamiranga	2003-09-25	4	0	9	36.8	0	0	0	0	0	0	0	20	1	31.80	0	0	0	0	0	0	0	0	0	0	0	0	0	0	1
4A4	3	Ste Therese Analamiranga	2003-09-25	4	1	8	36.8	0	0	0	0	0	0	0	20	1	884.79	1	62.13	0	0	0	0	0	0	0	0	0	0	0	0	1
5A4	3	Ste Therese Analamiranga	2003-09-25	4	1	8	37.1	1	0	0	0	0	0	0	20	0	0	1	31.06	0	0	0	0	0	0	0	0	0	0	0	0	1
6A4	3	Ste Therese Analamiranga	2003-09-25	4	1	9	36.8	0	0	0	0	0	0	0	29	0	0	0	0	0	0	0	0	0	0	0	0	0	0	0	0	0
7A4	3	Ste Therese Analamiranga	2003-09-25	4	1	11	37.3	1	0	0	0	0	0	0	30	0	0	0	0	0	0	0	0	0	0	0	0	0	0	0	0	0
8A4	3	Ste Therese Analamiranga	2003-09-25	4	1	8	36.9	0	0	0	0	0	0	0	20	1	15.59	0	0	0	0	0	0	0	0	0	0	0	0	0	0	1
9A4	3	Ste Therese Analamiranga	2003-09-25	4	1	12	36.9	0	0	0	0	0	0	0	28	0	0	0	0	0	0	0	0	0	0	0	0	1	63.24	0	0	1
10A4	3	Ste Therese Analamiranga	2003-09-25	4	1	8	36.9	0	0	0	0	0	0	0	22	0	0	0	0	0	0	0	0	0	0	0	0	0	0	0	0	0
11A4	3	Ste Therese Analamiranga	2003-09-25	4	1	7	36.6	0	0	0	0	0	0	0	15	1	851.85	0	0	0	0	0	0	0	0	0	0	1	79.84	0	0	1
12A4	3	Ste Therese Analamiranga	2003-09-25	4	1	8	37.3	1	0	0	0	0	0	0	20	0	0	0	0	0	0	0	0	0	0	0	0	0	0	0	0	0
13A4	3	Ste Therese Analamiranga	2003-09-25	4	0	8	36.8	0	0	0	0	0	0	0	20	0	0	0	0	0	0	0	0	0	0	0	0	0	0	0	0	0
14A4	3	Ste Therese Analamiranga	2003-09-25	4	0	12	37.2	1	1	0	0	0	1	0	26	1	520	0	0	0	0	0	0	0	0	0	0	0	0	0	0	1
15A4	3	Ste Therese Analamiranga	2003-09-25	4	0	9	36.7	0	0	0	0	0	0	0	25	1	318.09	0	0	0	0	0	0	0	0	0	0	0	0	0	0	1
16A4	3	Ste Therese Analamiranga	2003-09-25	4	0	9	36.6	0	0	0	0	0	0	0	23	1	2909.09	0	0	0	0	0	0	0	0	0	0	0	0	0	0	1
17A4	3	Ste Therese Analamiranga	2003-09-25	4	0	10	36.6	0	0	0	0	0	0	0	27	1	64	0	0	0	0	0	0	0	0	0	0	0	0	0	0	1
18A4	3	Ste Therese Analamiranga	2003-09-25	4	0	7	37.2	1	0	0	0	0	0	0	18	0	0	0	0	0	0	0	0	0	0	0	0	0	0	0	0	0
19A4	3	Ste Therese Analamiranga	2003-09-25	4	1	7	37.5	1	1	0	0	0	1	0	18	1	840	1	15.53	0	0	0	0	0	0	0	0	0	0	0	0	1
20A4	3	Ste Therese Analamiranga	2003-09-25	4	1	9	37.2	1	0	0	0	0	0	0	20	0	0	0	0	0	0	0	0	0	0	0	0	0	0	0	0	0
21A4	3	Ste Therese Analamiranga	2003-09-25	4	1	8	37.1	1	0	0	0	0	0	0	20	0	0	0	0	0	0	0	0	0	0	0	0	0	0	0	0	0
22A4	3	Ste Therese Analamiranga	2003-09-25	4	1	8	36.9	0	0	0	0	0	0	0	17	0	0	0	0	0	0	0	0	0	0	0	0	1	838.09	0	0	1
23A4	3	Ste Therese Analamiranga	2003-09-25	4	0	7	37	1	0	0	0	0	0	0	19	0	0	0	0	0	0	0	0	0	0	0	0	0	0	0	0	0
24A4	3	Ste Therese Analamiranga	2003-09-25	4	0	9	36.8	0	0	0	0	0	0	0	26	0	0	0	0	0	0	0	0	0	0	0	0	1	827.58	1	95.04	1
25A4	3	Ste Therese Analamiranga	2003-09-25	4	0	8	37.1	1	1	0	0	0	1	0	19	1	31.74	0	0	0	0	0	0	0	0	0	0	0	0	0	0	1
26A4	3	Ste Therese Analamiranga	2003-09-25	4	0	7	37.3	1	0	0	0	0	0	0	16	0	0	0	0	0	0	0	0	0	0	0	0	0	0	0	0	0
27A4	3	Ste Therese Analamiranga	2003-09-25	4	0	6	37.5	1	0	0	0	0	0	0	18	0	0	0	0	0	0	0	0	0	0	0	0	0	0	0	0	0
28A4	3	Ste Therese Analamiranga	2003-09-25	4	0	9	36.8	0	0	0	0	0	0	0	17	1	73.80	0	0	0	0	0	0	0	0	0	0	0	0	0	0	1
29A4	3	Ste Therese Analamiranga	2003-09-25	4	0	8	37.2	1	0	0	0	0	0	0	20	0	0	0	0	0	0	0	0	0	0	0	0	0	0	0	0	0
30A4	3	Ste Therese Analamiranga	2003-09-25	4	0	8	37.1	1	0	0	0	0	0	0	15	0	0	0	0	0	0	0	0	0	0	0	0	0	0	0	0	0
31A4	3	Ste Therese Analamiranga	2003-09-25	4	0	7	36.8	0	0	0	0	0	0	0	17	1	172.54	0	0	0	0	0	0	0	0	0	0	0	0	0	0	1
32A4	3	Ste Therese Analamiranga	2003-09-25	4	0	7	36.1	0	0	0	0	0	0	0	21	0	0	0	0	0	0	0	0	0	0	0	0	0	0	0	0	0
33A4	3	Ste Therese Analamiranga	2003-09-25	4	0	9	37.1	1	0	0	0	0	0	0	21	0	0	0	0	0	0	0	0	0	0	0	0	0	0	0	0	0
34A4	3	Ste Therese Analamiranga	2003-09-25	4	0	6	37.1	1	1	0	0	0	1	0	18	1	472.90	1	16	0	0	0	0	0	0	0	0	0	0	0	0	1
35A4	3	Ste Therese Analamiranga	2003-09-25	4	0	9	36.6	0	0	0	0	0	0	2	21	1	111.33	0	0	0	0	0	0	0	0	0	0	0	0	0	0	1
36A4	3	Ste Therese Analamiranga	2003-09-25	4	0	9	36.3	0	0	0	0	0	0	2	21	0	0	0	0	0	0	0	0	0	0	0	0	1	48	0	0	1
37A4	3	Ste Therese Analamiranga	2003-09-25	4	0	9	36.7	0	0	0	0	0	0	0	20	0	0	0	0	0	0	0	0	0	0	0	0	0	0	0	0	0
38A4	3	Ste Therese Analamiranga	2003-09-25	4	0	10	37.3	1	1	0	0	0	1	0	23	1	62.74	0	0	0	0	0	0	0	0	0	0	0	0	0	0	1
39A4	3	Ste Therese Analamiranga	2003-09-25	4	1	6	37.6	1	0	0	0	0	0	0	15	0	0	0	0	0	0	0	0	0	0	0	0	0	0	0	0	0
40A4	3	Ste Therese Analamiranga	2003-09-25	4	1	6	37.2	1	0	0	0	0	0	4	18	0	0	0	0	0	0	0	0	0	0	0	0	0	0	0	0	0
41A4	3	Ste Therese Analamiranga	2003-09-25	4	1	9	36.8	0	0	0	0	0	0	3	20	0	0	0	0	0	0	0	0	0	0	0	0	1	223.55	0	0	1
42A4	3	Ste Therese Analamiranga	2003-09-25	4	1	8	36.8	0	0	0	0	0	0	0	23	0	0	0	0	0	0	0	0	0	0	0	0	0	0	0	0	0
43A4	3	Ste Therese Analamiranga	2003-09-25	4	1	8	36.8	0	0	0	0	0	0	0	18	0	0	0	0	0	0	0	0	0	0	0	0	1	47.90	1	31.93	1
44A4	3	Ste Therese Analamiranga	2003-09-25	4	1	8	37	1	1	0	0	0	1	0	15	1	90.56	0	0	0	0	0	0	0	0	0	0	0	0	0	0	1
45A4	3	Ste Therese Analamiranga	2003-09-25	4	1	7	37.3	1	1	0	0	0	1	0	19	1	920	0	0	0	0	0	0	0	0	0	0	0	0	0	0	1
46A4	3	Ste Therese Analamiranga	2003-09-25	4	1	9	37.1	1	1	0	0	0	1	4	18	1	429.26	0	0	0	0	0	0	0	0	0	0	0	0	0	0	1
47A4	3	Ste Therese Analamiranga	2003-09-25	4	1	7	37.5	1	1	0	0	0	1	0	18	1	270.91	0	0	0	0	0	0	0	0	0	0	0	0	0	0	1
48A4	3	Ste Therese Analamiranga	2003-09-25	4	1	9	37.5	1	1	0	0	1	1	0	20	1	472.44	1	15.74	0	0	0	0	0	0	0	0	1	78.74	0	0	1
49A4	3	Ste Therese Analamiranga	2003-09-25	4	1	9	37	1	0	0	0	0	0	0	21	0	0	0	0	0	0	0	0	0	0	0	0	0	0	0	0	0
50A4	3	Ste Therese Analamiranga	2003-09-25	4	0	9	37.2	1	0	0	0	0	0	0	23	0	0	0	0	0	0	0	0	0	0	0	0	0	0	0	0	0
51A4	3	Ste Therese Analamiranga	2003-09-25	4	1	11	36.6	0	0	0	0	0	0	0	22	0	0	0	0	0	0	0	0	0	0	0	0	0	0	0	0	0
52A4	3	Ste Therese Analamiranga	2003-09-25	4	1	7	37.2	1	1	0	0	0	1	0	18	1	109.80	0	0	0	0	0	0	0	0	0	0	0	0	0	0	1
53A4	3	EPP Analamiranga	2003-09-25	4	0	11	36.9	0	0	0	0	0	0	0	27	0	0	0	0	0	0	0	0	0	0	0	0	0	0	0	0	0
54A4	3	EPP Analamiranga	2003-09-25	4	1	12	36.9	0	0	0	0	0	0	0	23	0	0	0	0	0	0	0	0	0	0	0	0	0	0	0	0	0
55A4	3	EPP Analamiranga	2003-09-25	4	1	11	37.2	1	0	0	0	0	0	0	23	0	0	0	0	0	0	0	0	0	0	0	0	0	0	0	0	0
56A4	3	EPP Analamiranga	2003-09-25	4	0	10	36.5	0	0	0	0	0	0	0	26	0	0	0	0	0	0	0	0	0	0	0	0	0	0	0	0	0
57A4	3	EPP Analamiranga	2003-09-25	4	0	10	37.1	1	0	0	0	1	1	0	22	0	0	0	0	0	0	0	0	0	0	0	0	1	2898.55	1	79.68	1
58A4	3	EPP Analamiranga	2003-09-25	4	1	12	36.8	0	0	0	0	0	0	0	26	0	0	0	0	0	0	0	0	0	0	0	0	0	0	0	0	0
59A4	3	EPP Analamiranga	2003-09-25	4	1	11	36.9	0	0	0	0	0	0	0	22	0	0	1	15.84	0	0	0	0	0	0	0	0	0	0	0	0	1
60A4	3	EPP Analamiranga	2003-09-25	4	0	12	37.2	1	0	0	0	0	0	0	38	0	0	0	0	0	0	0	0	0	0	0	0	0	0	0	0	0
61A4	3	EPP Analamiranga	2003-09-25	4	0	9	37.1	1	1	0	0	0	1	0	24	1	30.53	1	91.60	0	0	0	0	0	0	0	0	0	0	0	0	1
62A4	3	EPP Analamiranga	2003-09-25	4	0	12	36.9	0	0	0	0	0	0	0	39	0	0	0	0	0	0	0	0	0	0	0	0	0	0	0	0	0
63A4	3	EPP Analamiranga	2003-09-25	4	0	12	36.9	0	0	0	0	0	0	0	28	0	0	0	0	0	0	0	0	0	0	0	0	0	0	0	0	0
64A4	3	EPP Analamiranga	2003-09-25	4	1	10	37.3	1	0	0	0	0	0	0	23	0	0	0	0	0	0	0	0	0	0	0	0	0	0	0	0	0
65A4	3	EPP Analamiranga	2003-09-25	4	0	10	36.2	0	0	0	0	0	0	0	19	0	0	0	0	0	0	0	0	0	0	0	0	0	0	0	0	0
66A4	3	EPP Analamiranga	2003-09-25	4	1	7	36.6	0	0	0	0	0	0	0	19	0	0	0	0	0	0	0	0	0	0	0	0	1	121.44	0	0	1
67A4	3	EPP Analamiranga	2003-09-25	4	0	7	37.6	1	1	0	0	0	1	0	18	1	31.12	0	0	0	0	0	0	0	0	0	0	0	0	0	0	1
68A4	3	EPP Analamiranga	2003-09-25	4	1	10	36.4	0	0	0	0	0	0	0	21	0	0	0	0	0	0	0	0	0	0	0	0	0	0	0	0	0
[truncated: 3,175 more rows]

## Sheet: Caption
TITRE	Meaning
Code	Code
Commune	1=Mahasolo, 2=Ankadinondry Sakay, 3=Maroharona
School	Name of the school
Date	day/month/yaer
Passage	1 to 9 (1=Nov2002…. 9=Fev2005)
Sex	0 female, 1 male
Age	in year, at the date of the survey
Temperature	axillary (not corrected) in degre Celsius
Fever	Fever (if axillary temperature ≥37.0°C) =1
AttackPf	Malaria attack due to P.falciparum (if fever + presence of Pf asexual stade)=1
AttackPm	Malaria attack due to P.malariae (if fever + presence of Pm asexual stade)=1
AttackPo	Malaria attack due to P.ovale (if fever + presence of Po asexual stade)=1
AttackPv	Malaria attack due to P.vivax (if fever + presence of Pv asexual stade)=1
AttackPsp	Malaria attack due to any Plasmodium species (if fever + presence of Pf, Pm, Po or Pv asexual stade)=1
Spleen	0 to 4; palpation performed standing
Weight	in kg
PF	P.falciparum (asexual only); 0=no, 1=yes
falc	P.falciparum (asexual only), in No. of parasites/microlitre of blood
PFGam	P.falciparum (gametocyte only); 0=no, 1=yes
GamFal	P.falciparum (gametocyte only); in No. of parasites/microlitre of blood
PM	P.malariae (asexual only); 0=no, 1=yes
mala	P.malariae (asexual only), in No. of parasites/microlitre of blood
PMGam	P.malariae (gametocyte only); 0=no, 1=yes
GamMala	P.malariae (gametocyte only); in No. of parasites/microlitre of blood
PO	P.ovale (asexual only); 0=no, 1=yes
oval	P.ovale (asexual only), in No. of parasites/microlitre of blood
POGam	P.ovale (gametocyte only); 0=no, 1=yes
GamOval	P.ovale (gametocyte only); in No. of parasites/microlitre of blood
PV	P.vivax (asexual only); 0=no, 1=yes
viva	P.vivax (asexual only), in No. of parasites/microlitre of blood
PVGam	P.vivax (gametocyte only); 0=no, 1=yes
GamViva	P.vivax (gametocyte only); in No. of parasites/microlitre of blood
PlasmoIndex	presence of at least one Plasmodium; 0=no, 1=yes
